# Supplementary material
Source: publisher figshare collection journal article supplement (https://acs.figshare.com/ndownloader/files/13534853)
Supplement: Supplementary file 1 [file 13534853]

Supporting Information for:

**Consecutive C-H and O<sub>2</sub> activation at a Pt(II) Center to Produce Pt(IV) Aryls**

David Watts, Peter Y. Zavalij, Andrei N. Vedernikov\*

*Department of Chemistry and Biochemistry, University of Maryland,  
College Park, MD 20742*

E-mail: [avederni@umd.edu](mailto:avederni@umd.edu)

|       |                                                                                                                                                    |     |
|-------|----------------------------------------------------------------------------------------------------------------------------------------------------|-----|
| I.    | Materials and Methods .....                                                                                                                        | S2  |
| II.   | Ligand Synthesis .....                                                                                                                             | S3  |
| III.  | Synthesis of Pt Complexes.....                                                                                                                     | S5  |
| IV.   | Reaction of (C <sub>6</sub> H <sub>4</sub> -dpms)Pt <sup>II</sup> (H <sub>2</sub> O), <b>4</b> , with O <sub>2</sub> in TFE .....                  | S20 |
|       | a. Monitoring in wet TFE.....                                                                                                                      | S20 |
|       | b. Reversibility of initial reactivity .....                                                                                                       | S22 |
|       | c. Equilibrium formation of <b>11</b> from <b>4</b> and <b>8</b> .....                                                                             | S24 |
| V.    | Reaction of (C <sub>6</sub> H <sub>4</sub> -dpms)Pt <sup>II</sup> (H <sub>2</sub> O), <b>4</b> , with O <sub>2</sub> in TFE/benzene mixtures ..... | S26 |
|       | a. Attempted reductive elimination of <b>7b</b> .....                                                                                              | S27 |
|       | b. Procedure of analysis of kinetics data .....                                                                                                    | S27 |
|       | c. Kinetics experiments.....                                                                                                                       | S29 |
|       | d. Effect of doping with products and other additives.....                                                                                         | S37 |
| VI.   | Kinetics of Li[(C <sub>6</sub> H <sub>4</sub> -dpms)PtPh], Li( <b>12a</b> ), oxidation by O <sub>2</sub> .....                                     | S43 |
| VII.  | X-Ray Crystallographic Data .....                                                                                                                  | S44 |
| VIII. | NMR Spectra.....                                                                                                                                   | S51 |
| IX.   | References .....                                                                                                                                   | S73 |

## I. Materials and Methods

All manipulations were carried out under argon atmosphere unless otherwise noted. SEPIX 560 40 – 63  $\mu\text{m}$  silica gel was purchased from ZEOCHEM and used for all column chromatography purifications. Potassium tetrachloroplatinate(II) was purchased from Pressure Chemical and used without purification. 2,2,2-Trifluoroethanol was purchased from Sigma-Aldrich or Oakwood Chemical, dried over calcium hydride, purified by vacuum transfer and was stored in an argon-filled glovebox. The storage of 2,2,2-trifluoroethanol over molecular sieves leads to slow alkalization of the solvent and so was not employed. THF solvent was dried over and distilled from sodium / benzophenone adduct under argon and stored over molecular sieves. Deuterium-labeled solvents  $\text{C}_6\text{D}_6$ ,  $\text{CDCl}_3$ ,  $\text{DMSO-d}_6$  were purchased from Cambridge Isotope Laboratories and TFE- $\text{d}_1$  was purchased from Sigma Aldrich.  $^1\text{H}$  (400 Mhz, 500 MHz, and 600 Mhz) and  $^{13}\text{C}$  NMR (125 MHz) spectra were recorded on a Bruker DRX-500 or Bruker AVIII-600MHz spectrometer. Chemical shifts are reported in parts per million (ppm) ( $\delta$ ) and referenced to residual solvent resonance peaks. Multiplicities are reported as follows: br (broad signal), s (singlet), d (doublet), t (triplet), q (quartet), quin (quintet), sex (sextet), m (multiplet), dd (doublet of doublets), ddd (doublet of doublet of doublets), qd (quartet of doublets). Coupling constants (J) are reported in Hz. High Resolution Mass Spectrometry (HRMS) experiments were performed using a JEOL AccuTOF-CS instrument.

## II. Ligand Synthesis

### Synthesis of H(Ph-dpms):

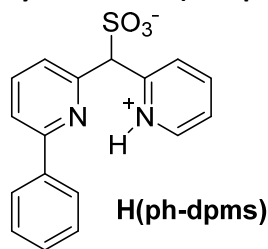

The synthesis of H(Ph-dpms) was carried out according to the published procedure.<sup>1</sup>

$^1\text{H}$  NMR (400 MHz, 22 °C, DMSO- $d_6$ ),  $\delta$ : 5.94 (s, 1H), 7.45 (overlapping multiplets, 3H), 7.81 (d,  $^3J_{\text{HH}} = 7.4$  Hz, 1H), 7.92 (d,  $^3J_{\text{HH}} = 7.8$  Hz, 1H), 7.94 - 8.01 (overlapping multiplets, 4H), 8.35 (d,  $^3J_{\text{HH}} = 7.8$  Hz, 1H), 8.59 (ddd,  $^3J_{\text{HH}} = 8.6$ , 8.2 Hz,  $^4J_{\text{HH}} = 1.6$  Hz, 1H), 8.97 (dd,  $^3J_{\text{HH}} = 5.8$  Hz,  $^4J_{\text{HH}} = 0.9$  Hz, 1H). The expected signal of the NH – proton in H(Ph-dpms) could not be observed in either  $\text{CDCl}_3$  or  $\text{CDCl}_2$  solution. A very broad signal at about 3 ppm is seen in DMSO solutions which might result from a fast proton exchange between the  $\text{NH}^+$  group and the solvent residual water.

$^{13}\text{C}$  NMR (125 MHz, 22 °C, DMSO- $d_6$ ),  $\delta$ : 68.8, 119.3, 124.0, 125.4, 126.7, 128.8, 128.9, 129.2, 138.0, 138.1, 141.5, 145.4, 151.8, 153.6, 154.7.

ESI-MS(-) of solution of H(Ph-dpms) in methanol doped with KOH, H(Ph-dpms) = 325.08. Calculated for H(Ph-dpms) =  $\text{C}_{17}\text{H}_{13}\text{N}_2\text{O}_3\text{S}$ , 325.07.

### Synthesis of Li(Ph-dpms):

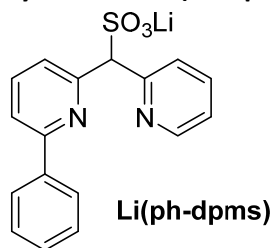

The synthesis of Li(Ph-dpms) was carried out according to the published procedure.<sup>2</sup> Alternatively, Li(Ph-dpms) could be produced from H(Ph-dpms) by the following method: Under air, H(Ph-dpms) (0.25 g, 0.75 mmol) was dispersed in 10 mL deionized  $\text{H}_2\text{O}$  along with  $\text{LiOH}\cdot\text{H}_2\text{O}$  (0.035 g, 0.83 mmol, 1.1 eq.) in a 50 mL round bottom flask. The slurry was stirred at 60 °C until all H(Ph-dpms) had dissolved (approx. 15 min) resulting in an orangish solution with a pH of ~10. The solvent was removed *in vacuo*. To remove excess LiOH, the resulting residue was flushed through a short silica column (2:2:1 EtOAc:DCM:MeOH) to give a white powder which was dried overnight at 60 °C in a vacuum oven, yielding dry Li(Ph-dpms) (0.23 g, 68mmol, 91 % yield). Aqueous solutions of the resulting Li(Ph-dpms) had a pH of ~7.

$^1\text{H}$  NMR (400 MHz, 22 °C, MeOD),  $\delta$ : 5.80 (s, 1H), 7.34 (ddd,  $^3J_{\text{HH}} = 7.2$ , 4.8 Hz,  $^4J_{\text{HH}} = 0.8$  Hz, 1H), 7.38-7.45 (m, 3H), 7.75 (dd,  $^3J_{\text{HH}} = 7.6$  Hz,  $^4J_{\text{HH}} = 0.8$  Hz, 1H), 7.82-7.92 (m, 3H), 8.00-8.02 (m, 2H), 8.26 (d,  $^3J_{\text{HH}} = 8.0$  Hz, 1H), 8.47 (dd,  $^3J_{\text{HH}} = 4.0$  Hz,  $^4J_{\text{HH}} = 0.4$  Hz, 1H).

$^{13}\text{C}$  NMR (125 MHz, 22 °C, MeOD),  $\delta$ : 73.6, 117.3, 121.1, 121.6, 124.0, 125.1, 126.7, 127.0, 135.0, 135.5, 137.8, 146.3, 154.0, 154.7, 154.9.

ESI-MS(-) of a solution of Li(Ph-dpms) in water,  $[\text{Ph-dpms}]^- = 325.09$ . Calculated for  $[\text{Ph-dpms}]^-$ :  $\text{C}_{17}\text{H}_{13}\text{N}_2\text{O}_3\text{S}$ , 325.07.

### III. Synthesis of Pt Complexes

#### Synthesis of $(\text{C}_6\text{H}_4\text{-dpms})\text{Pt}(\text{H}_2\text{O})$ , **4**:<sup>1</sup>

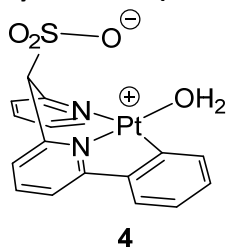

The synthesis of  $(\text{C}_6\text{H}_4\text{-dpms})\text{Pt}(\text{H}_2\text{O})$ , **4**, was carried out according to the published procedure.<sup>1</sup>

#### Synthesis of $(\text{C}_6\text{H}_4\text{-dpms})\text{Pt}(\text{OCH}_2\text{CF}_3)(\text{OH})$ , **8**:<sup>2</sup>

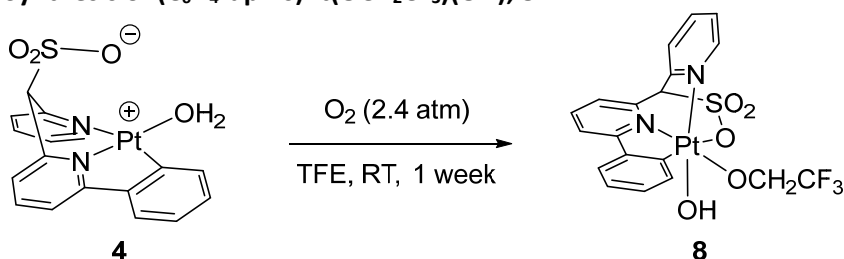

To a 25 mL Schlenk tube was added **4** (40.0 mg, 74.4  $\mu\text{mol}$ ) along with 5 mL TFE. A stir bar was added, the head space was purged with  $\text{O}_2$ , and then the tube was pressurized to 20 psi  $\text{O}_2$  (total  $\text{pO}_2$  of  $\sim 35$  psi) before being sealed. The solution was stirred vigorously at room temperature over the course of one week. The color initially changed to deep purple and then slowly to yellow. A 0.05 mL aliquot was removed, dried, dissolved in  $\text{DMSO-d}_6$ , and submitted to a  $^1\text{H-NMR}$  analysis which showed one new species, identified as complex **8** in a 0.7:1 ratio with  $(\text{C}_6\text{H}_4\text{-dpms})\text{Pt}(\text{DMSO-d}_6)$  (41% NMR yield of **8**). The TFE solution was dried *in vacuo* leaving a light yellow residue which was purified by column chromatography on silica (1:10 MeOH:DCM) to give pure **8** as a white powder (13.2 mg, 21  $\mu\text{mol}$ , 28 %). XRD quality crystals could be grown from a TFE solution of **8** layered with  $\text{Et}_2\text{O}$  and the crystal structure has been published.<sup>2</sup> Samples of complex **8** are stable when stored in the freezer but slowly decompose at room temperature. In TFE solution the decomposition takes weeks at RT whereas in  $\text{DMSO-d}_6$  it is on the order of a few days.

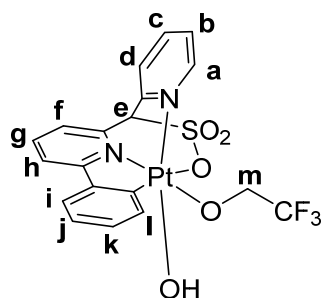

$^1\text{H}$  NMR (600 MHz, 22  $^\circ\text{C}$ ,  $\text{TFE-d}_1$ ),  $\delta$ : 6.18 (s, 1H<sub>e</sub>), 7.40 (m, 2H<sub>j,k</sub>), 7.61 (ddd,  $^3J_{\text{HH}} = 8.2, 6.6$  Hz,  $^4J_{\text{HH}} = 1.3$  Hz, 1H<sub>b</sub>), 7.67 (dd,  $^3J_{\text{HH}} = 7.1$  Hz,  $^4J_{\text{HH}} = 2.2$  Hz, 1H<sub>i</sub>), 7.73 (d,  $^3J_{\text{HH}} = 7.8$  Hz, 1H<sub>f</sub>), 7.78 (dd,  $^3J_{\text{HH}} = 7.3$  Hz,  $^4J_{\text{HH}} = 1.8$  Hz, 1H<sub>l</sub>), 7.90 (overlapping d,  $^3J_{\text{HH}} = 8.2$  Hz, 2H<sub>d,h</sub>), 8.13 (m, 2H<sub>g,c</sub>), 8.81 (dd,  $^3J_{\text{HH}} = 5.8$  Hz,  $^4J_{\text{HH}} = 1.0$  Hz). The

Pt-OCH<sub>2</sub>CF<sub>3</sub> protons (H<sub>m</sub>) could not be found in TFE-d<sub>1</sub>, presumably due to overlap with the large solvent -CH<sub>2</sub>- resonance.

<sup>1</sup>H NMR (400 MHz, 22 °C, DMSO-d<sub>6</sub>), δ: 1.53 (brs, 1H), 3.77 (dq, <sup>2</sup>J<sub>HH</sub> = 12.7 Hz, <sup>3</sup>J<sub>HF</sub> = 10.1 Hz, 1H), 4.01 (dq, <sup>2</sup>J<sub>HH</sub> = 12.7 Hz, <sup>3</sup>J<sub>HF</sub> = 10.1 Hz, 1H), 6.88 (s, 1H), 7.35 (m, 2H), 7.62 (m, 1H), 7.78 (ddd, <sup>3</sup>J<sub>HH</sub> = 8.1, 5.8 Hz, <sup>4</sup>J<sub>HH</sub> = 1.3 Hz, 1H), 7.86 (dd, <sup>3</sup>J<sub>HH</sub> = 7.2 Hz, <sup>4</sup>J<sub>HH</sub> = 1.4 Hz, 1H), 7.90 (m, 1H), 8.01 (dd, <sup>3</sup>J<sub>HH</sub> = 8.0 Hz, <sup>4</sup>J<sub>HH</sub> = 0.7 Hz, 1H), 8.23 – 8.32 (m, 3H), 8.67 (dd, <sup>3</sup>J<sub>HH</sub> = 5.9 Hz, <sup>4</sup>J<sub>HH</sub> = 1.5 Hz, 1H).

<sup>19</sup>F NMR (376 MHz, 21 °C, DMSO-d<sub>6</sub>), δ: -73.49 (brt, <sup>3</sup>J<sub>HF</sub> = 10.1 Hz)

ESI-MS(+) of solution of **8** in TFE with a drop of HBF<sub>4</sub>, [**8**+H]<sup>+</sup> = 636.05. Calculated for [**15**+H]<sup>+</sup> C<sub>19</sub>H<sub>16</sub>F<sub>3</sub>N<sub>2</sub>O<sub>5</sub>PtS<sup>+</sup>, 636.04.

### Synthesis of Li[(C<sub>6</sub>H<sub>4</sub>-dpms)PtPh], Li(**12a**):

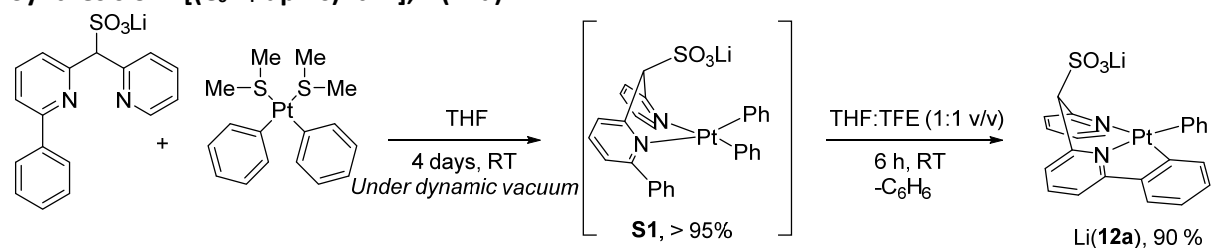

The precursor Ph<sub>2</sub>Pt(SMe<sub>2</sub>)<sub>2</sub> was prepared according to the literature method.<sup>3</sup> In an argon filled glovebox, Li(Ph-dpms) (166 mg, 0.500 mmol) was dissolved in 4 mL anhydrous de-gassed THF and a stir bar was added. In a separate vial, Ph<sub>2</sub>Pt(SMe<sub>2</sub>)<sub>2</sub> (238 mg, 0.500 mmol) was dissolved in 4 mL anhydrous de-gassed THF. The two solutions were then combined and left to stir for 24 h after which a yellow precipitate had formed. The solvent was then removed under vacuum. The residue was then dispersed in 8 mL anhydrous THF and stirred for another 24 h. This process was repeated 4 times (96 h total) or until the precipitate disappeared and the solution became clear. The solvent was removed, resulting in a yellow powder weighing 320 mg. A sample was dissolved in a 1:1 mixture of THF-d<sub>8</sub>:MeOD. Subsequent <sup>1</sup>H-NMR analysis showed primarily one species with 22 H in the aromatic region (one of which is likely the bridging methine C-H) which was tentatively assigned as **S1**. No SMe<sub>2</sub> was observed in the spectrum.

The yellow powder (**S1**) was then dispersed in 5 mL of a de-gassed 1:1 THF:TFE solvent mixture. The slurry was stirred for 6 h before the solvent was removed resulting in a yellowish orange residue. Recrystallization from MeOH with Et<sub>2</sub>O yielded Li(**12a**) as a pale yellow semi-crystalline powder (262 mg, 90%).

<sup>1</sup>H-NMR (400 MHz, 22 °C, DMSO-d<sub>6</sub>), δ: 5.85 (s, 1H), 6.80-6.95 (m, 4H), 6.98, (vt, <sup>3</sup>J<sub>HH</sub> = 7.3 Hz, 2H), 7.17 (m, 2H), 7.25 (m, 1H), 7.55 (dd, <sup>3</sup>J<sub>HH</sub> = 7.5 Hz, <sup>4</sup>J<sub>HH</sub> = 1.3 Hz, 2H), 7.64 (vd, <sup>3</sup>J<sub>HH</sub> = 7.9 Hz, 1H), 7.77 (vd, <sup>3</sup>J<sub>HH</sub> = 7.9 Hz, 1H), 7.90-8.01 (m, 3H), 8.22 (dd, <sup>3</sup>J<sub>HH</sub> = 5.9 Hz, <sup>4</sup>J<sub>HH</sub> = 1.5 Hz, 1H)

<sup>13</sup>C-NMR (125 MHz, 22 °C, MeOD), δ: 109.1, 113.2, 113.9, 115.1 (<sup>3</sup>J<sub>PtC</sub> = 45.7 Hz, Pt-C<sub>6</sub>H<sub>4</sub> C-o), 115.9, 117.0, 118.6 (2C, <sup>3</sup>J<sub>PtC</sub> = 69.8 Hz, Pt-Ph C-o), 120.5, 121.3, 129.0, 129.6, 129.7, 130.4, 137.7, 137.8, 142.6, 144.4, 144.7, 145.9, 157.3.

El. Analysis, calculated for C<sub>23</sub>H<sub>17</sub>LiN<sub>2</sub>O<sub>3</sub>PtS·(CH<sub>3</sub>OH): C, 45.36; H, 3.33; N, 4.41. Found C, 45.07; H, 3.46; N, 4.39.

ESI-MS(-) of a solution of Li(**12a**) in MeOH, [**12a**]<sup>-</sup>: 596.37. Calculated for [**12a**]<sup>-</sup>: C<sub>23</sub>H<sub>17</sub>N<sub>2</sub>O<sub>3</sub>PtS, 596.06.

A combination of  $^1\text{H}$ -NMR NOE and COSY provided assignments for all protons belonging to Li(**12a**) in TFE solvent. 1D NOE experiments also provide evidence for the  $\kappa^3\text{-CNN}$  (as opposed to  $\kappa^3\text{-CNO}$ ) structure assignment via the observed 0.9 % spin-spin coupling between the ortho pyridyl  $\text{H}_a$  and ortho phenyl  $\text{H}_b$  in Li(**12a**) (Figure S1).

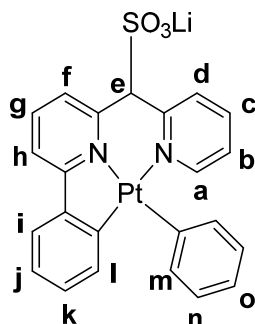

$^1\text{H}$ -NMR (500 MHz, 22 °C, TFE),  $\delta$ : 5.78 (s, 1 $\text{H}_e$ ), 7.06 – 7.13 (m, 2 $\text{H}_{k,o}$ ), 7.13 – 7.22 (m, 4 $\text{H}_{b,j,n}$ ), 7.35 (d,  $^3J_{\text{HH}} = 7.4$  Hz, 1 $\text{H}_i$ ), 7.60 (d,  $^3J_{\text{HH}} = 8.1$  Hz, 1 $\text{H}_f$ ), 7.67 (d,  $^3J_{\text{HH}} = 7.4$  Hz, 2 $\text{H}_m$ ), 7.71 (d,  $^3J_{\text{HH}} = 8.1$  Hz, 1 $\text{H}_i$ ), 7.76 (vd,  $^3J_{\text{HH}} = 8.1$  Hz, 1 $\text{H}_d$ ), 7.93 (m, 2 $\text{H}_{c,h}$ ), 7.98 (vt,  $^3J_{\text{HH}} = 7.8$  Hz, 1 $\text{H}_g$ ), 8.36 (d,  $^3J_{\text{HH}} = 5.9$  Hz).

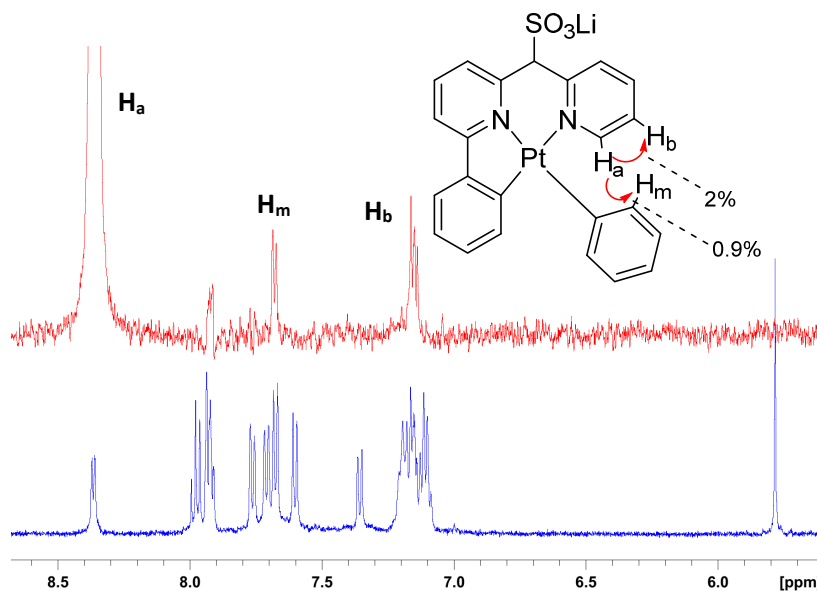

**Figure S1.** Red Trace - Selective irradiation of  $\text{H}_a$  in Li(**12a**) shows NOE coupling to neighboring protons  $\text{H}_m$  and  $\text{H}_b$ . Blue Trace – Normal  $^1\text{H}$ -NMR spectrum of Li(**12a**) in TFE.

#### Synthesis of Li(**13a**) from Li(**12a**) via oxidation with $\text{O}_2$ :

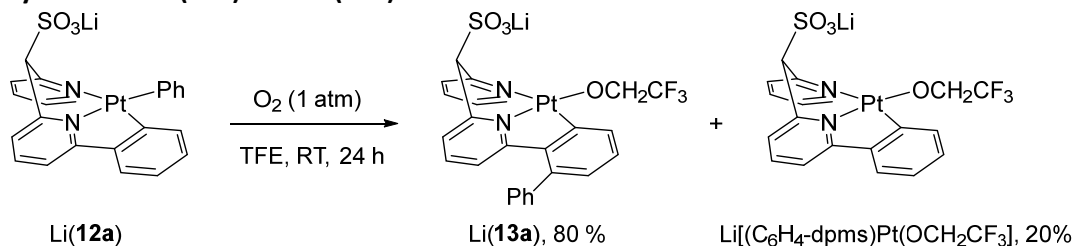

In an argon filled glovebox, Li(**12a**) (4.0 mg, 6.6  $\mu\text{mol}$ ) was placed in vial along with 0.6 mL de-gassed TFE. Due to the low solubility of Li(**12a**) in TFE, not all solids dissolved and the mixture was passed through a Teflon syringe filter to give a yellow saturated TFE solution of Li(**12a**) (2.8 mM as measured by  $^1\text{H}$ -NMR). The solution was transferred to a 25 mL Schlenk tube and the headspace flushed with  $\text{O}_2$ . After vigorously stirring for 1 day, an aliquot was taken, the solvent removed under vacuum, and the residue dissolved in  $\text{DMSO-d}_6$ . The  $^1\text{H}$ -NMR spectrum showed two products, Li(**13a**) and  $[(\text{C}_6\text{H}_4\text{-dpms})\text{Pt}(\text{OCH}_2\text{CF}_3)]^-$ , in an 8:2 ratio, respectively (Figure S2). The  $^1\text{H}$ -NMR spectrum in TFE showed the same two products. An additional NOE experiment in TFE supports the assigned  $\kappa^3\text{-CNN}$  ligand arrangement (Figure S2).

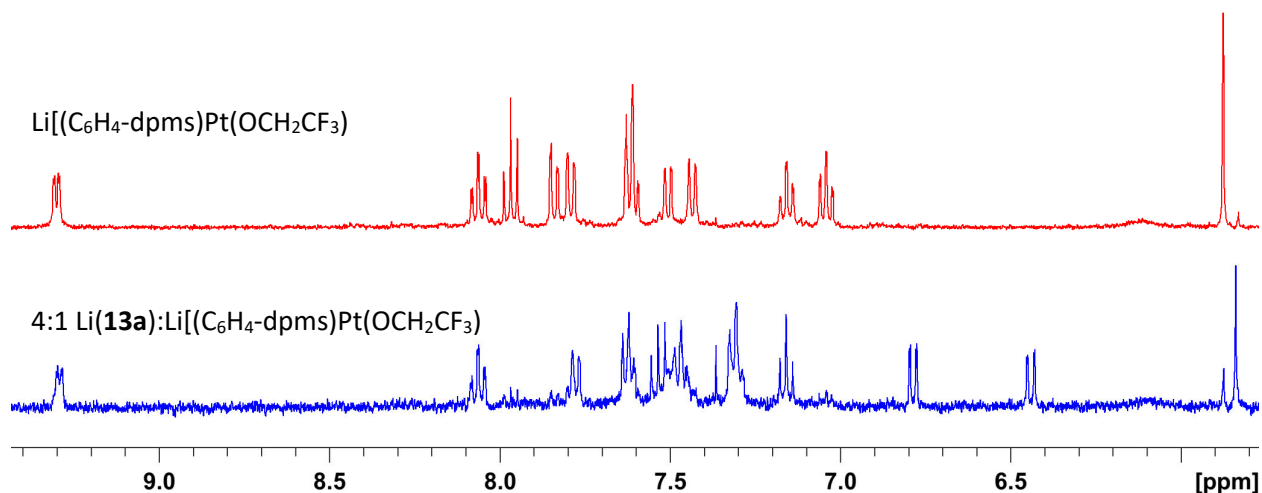

**Figure S2.** Red Trace – Independently synthesized  $\text{Li}[(\text{C}_6\text{H}_4\text{-dpms})\text{Pt}(\text{OCH}_2\text{CF}_3)]$  in  $\text{DMSO-d}_6$ . Blue trace – 8:1 mixture of Li(**13a**) and  $\text{Li}[(\text{C}_6\text{H}_4\text{-dpms})\text{Pt}(\text{OCH}_2\text{CF}_3)]$  resulting from the oxidation of Li(**12a**) by  $\text{O}_2$  in TFE.

#### Characterization data for Li(**13a**):

$^1\text{H}$  NMR (400 MHz, 22  $^\circ\text{C}$ ,  $\text{DMSO-d}_6$ ),  $\delta$ : 4.21 (two overlapping dq, 2H), 5.84 (s, 1H), 6.44 (dd,  $^3J_{\text{HH}} = 8.4$  Hz,  $^4J_{\text{HH}} = 1.0$  Hz, 1H), 6.79 (dd,  $^3J_{\text{HH}} = 7.5$  Hz,  $^4J_{\text{HH}} = 1.3$  Hz, 1H), 7.16 (t,  $^3J_{\text{HH}} = 7.5$  Hz, 1H), 7.31 (m, 3H), 7.44 – 7.56 (m, 4H), 7.62 (vt,  $^3J_{\text{HH}} = 7.5$  Hz, 1H), 7.78 (d,  $^3J_{\text{HH}} = 7.8$  Hz, 1H), 8.06 (ddd,  $^3J_{\text{HH}} = 8.2$ , 7.5 Hz,  $^4J_{\text{HH}} = 1.3$  Hz, 1H), 9.29 (d,  $^3J_{\text{HH}} = 5.9$  Hz, 1H).

$^1\text{H}$  NMR (400 MHz, 22  $^\circ\text{C}$ , MeOD),  $\delta$ : 4.32 (dq,  $^2J_{\text{HH}} = 10.8$  Hz,  $^3J_{\text{HF}} = 9.6$  Hz, 1H), 4.41 (dq,  $^2J_{\text{HH}} = 10.8$  Hz,  $^3J_{\text{HH}} = 9.6$  Hz, 1H), 5.89 (s, 1H), 6.61 (d,  $^3J_{\text{HH}} = 8.4$  Hz, 1H), 6.84 (d,  $^3J_{\text{HH}} = 7.5$  Hz, 1H), 7.17 (vt,  $^3J_{\text{HH}} = 8.0$  Hz, 1H), 7.30 (vt,  $^3J_{\text{HH}} = 7.5$  Hz, 2H), 7.36 (d,  $^3J_{\text{HH}} = 7.5$ , 1H), 7.39 – 7.50 (m, 5 H), 7.62 (vt,  $^3J_{\text{HH}} = 7.5$  Hz, 1H), 7.67 (d,  $^3J_{\text{HH}} = 7.5$ , 1H), 7.87 (d,  $^3J_{\text{HH}} = 8.0$  Hz, 1H), 8.07 (vt,  $^3J_{\text{HH}} = 7.5$  Hz, 1H), 9.41 (d,  $^3J_{\text{HH}} = 5.6$  Hz, 1H).

ESI-MS(-) of the crude reaction mixture containing both Li(**13a**) and  $\text{Li}[(\text{C}_6\text{H}_4\text{-dpms})\text{Pt}(\text{OCH}_2\text{CF}_3)]$  in TFE, [**13a**] $^-$ : 693.97. Calculated for [**12a**] $^-$ :  $\text{C}_{19}\text{H}_{14}\text{F}_3\text{N}_2\text{O}_4\text{PtS}$ , 694.06.



4:1 mixture of Li(**13a**):Li[(C<sub>6</sub>H<sub>4</sub>-dpms)Pt(OCH<sub>2</sub>CF<sub>3</sub>)]

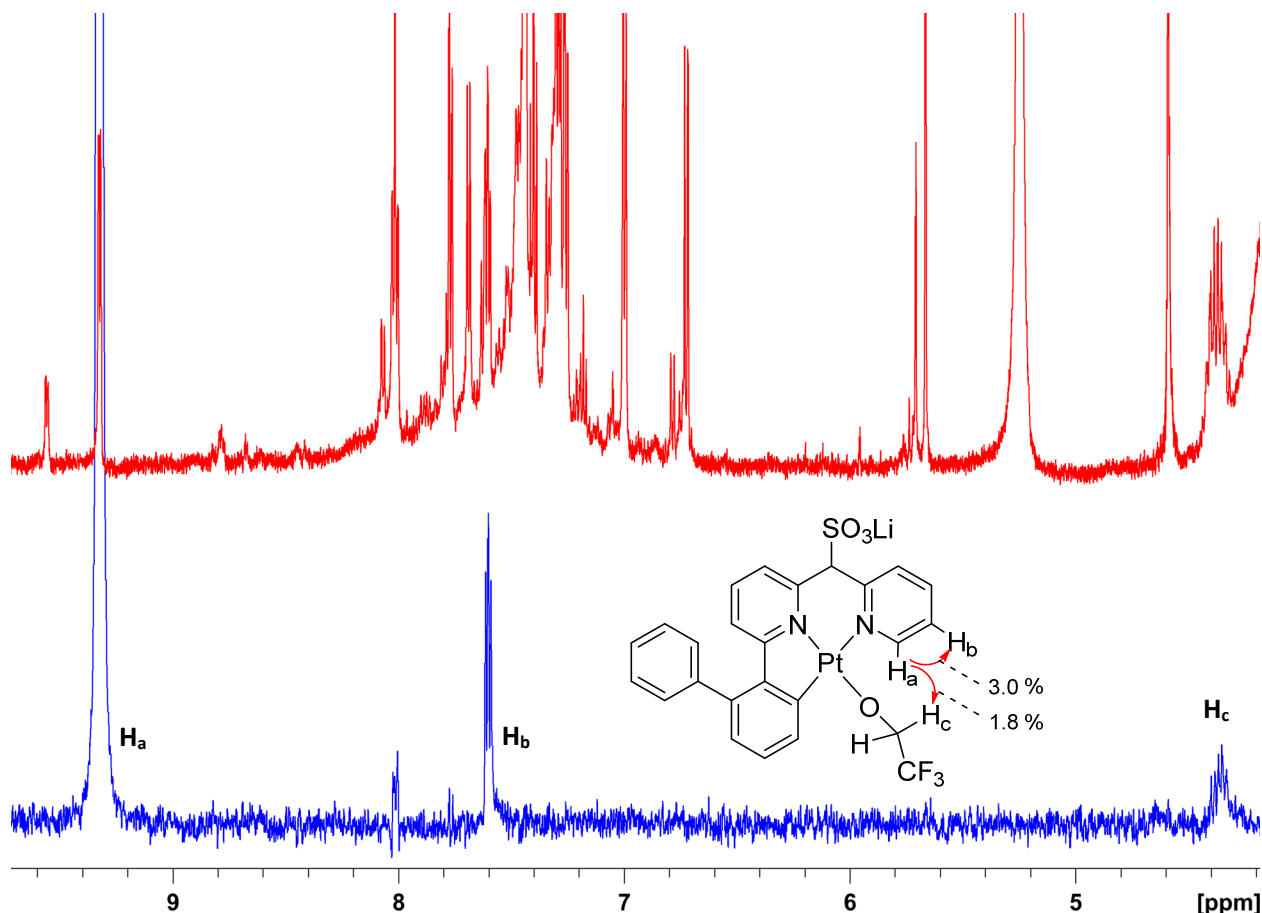

**Figure S3.** Red trace – Spectrum of aerobic oxidation product of Li(**12a**) in TFE showing 8:2 ratio of Li(**13a**) and Li[(C<sub>6</sub>H<sub>4</sub>-dpms)Pt(OCH<sub>2</sub>CF<sub>3</sub>)]. Blue trace – Selective irradiation of H<sub>a</sub> in Li(**12a**) show NOE coupling to neighboring protons H<sub>b</sub> and H<sub>c</sub>.

#### Synthesis of Li(**13a**) from Li(**12a**) via oxidation with H<sub>2</sub>O<sub>2</sub>:

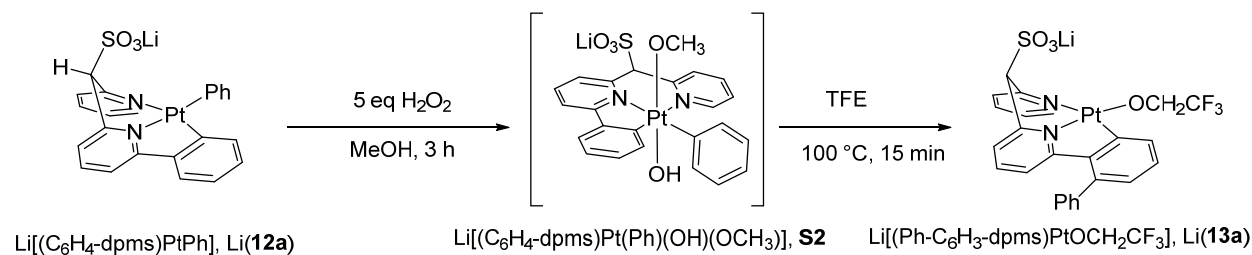

Li(**12a**) (183mg, 0.303 mmol) was dissolved in 5 mL MeOH. While stirring, 0.155 mL of a 30% H<sub>2</sub>O<sub>2</sub> (1.51 mmol, 5 eq.) solution was added. The color changed from yellow to murky white. After stirring for 3 h the methanol was removed in vacuo. The residue was stirred in 5 mL anhydrous DCM for 30 min and passed through a 20  $\mu$ m Teflon syringe filter to produce a clear solution. The DCM was reduced in volume to  $\sim$  1 mL and diluted with 3 mL hexanes to produce a white precipitate. The supernatant was decanted off and the residue washed with hexanes and then dried under high vacuum

to produce **S2** as an off-white powder (190 mg, 96%) which decomposes slowly at room temperature but is stable if stored in the freezer. The NMR and ESI-MS data are consistent with the proposed structure for **S2**, however the exact ligand arrangement might be different.

Characterization data for **S2**:

$^1\text{H}$  NMR (400 MHz, 22 °C, MeOD),  $\delta$ : 2.16 (s,  $^3J_{\text{PtH}} = 40.5$  Hz, 3H), 6.44 (s, 1H), 6.83 (dd,  $^3J_{\text{HH}} = 8.0$ ,  $^4J_{\text{HH}} = 1.1$  Hz, JPt-H = 41.9 Hz, 1H), 6.97 (ddd,  $^3J_{\text{HH}} = 8.3$ , 7.1 Hz,  $^4J_{\text{HH}} = 1.4$  Hz, 1H), 7.17 (ddd,  $^3J_{\text{HH}} = 8.3$ , 7.1 Hz,  $^4J_{\text{HH}} = 1.1$  Hz, 1H), 7.24 – 7.36 (m, 4H), 7.67 – 7.79 (m,  $^3J_{\text{PtH}} = 30.7$  Hz, 1H), 7.85 (dd, J = 7.9, 1.3 Hz, 1H), 7.95 (dd, J = 7.7, 0.7 Hz, 1H), 7.99 – 8.10 (m, 3H), 8.16 (t,  $^3J_{\text{HH}} = 7.8$  Hz, 1H), 8.32 (dd,  $^3J_{\text{HH}} = 8.5$  Hz,  $^4J_{\text{HH}} = 0.8$  Hz, 1H), 8.55 (dd,  $^3J_{\text{HH}} = 5.8$  Hz,  $^4J_{\text{HH}} = 1.3$  Hz,  $^3J_{\text{PtH}} = 20.2$  Hz, 1H).

$^{13}\text{C}$  NMR (125 MHz, 22 °C, MeOD),  $\delta$ : 56.6, 78.8, 120.7, 125.8, 126.1, 126.2, 126.5, 128.4, 128.6, 128.8, 128.9, 131.0, 131.6, 132.2, 132.7, 135.7, 137.6, 138.0, 140.1, 141.2, 143.6, 152.7, 154.0, 164.1.

ESI-MS(-) of a solution of in TFE,  $[(\text{C}_6\text{H}_4\text{-dpms})\text{Pt}(\text{Ph})(\text{OH})(\text{OCH}_3)]^-$ : 644.11. Calculated for  $[(\text{C}_6\text{H}_4\text{-dpms})\text{Pt}(\text{Ph})(\text{OH})(\text{OCH}_3)]^-$ :  $\text{C}_{24}\text{H}_{21}\text{N}_2\text{O}_5\text{PtS}^-$ , 644.08

$\text{Li}[(\text{C}_6\text{H}_4\text{-dpms})\text{Pt}(\text{Ph})(\text{OH})(\text{OCH}_3)]$ , **S2**, (14.4 mg, 22.1  $\mu\text{mol}$ ) was dissolved in 0.6 mL TFE and heated at 100 °C for 15 min. Analysis of the  $^1\text{H}$ -NMR in TFE showed  $\text{Li}[(\text{C}_6\text{H}_4\text{-dpms})\text{Pt}(\text{Ph})(\text{OH})(\text{OCH}_3)]$  had been entirely consumed and a new complex, formed in 85 % NMR yield (as judged by the bridging methine C-H singlet), had appeared along with 1 eq. methanol (measured by integration of its 3.42 ppm singlet). The solution was passed through a 0.20  $\mu\text{m}$  Teflon syringe filter and the solvent was removed to yield 15.4 mg **Li(13a)** as a yellow residue. Recrystallization from TFE with  $\text{Et}_2\text{O}$  yielded 10.1 mg **Li(13a)** as a yellow powder (65 % yield). The  $^1\text{H}$ -NMR spectrum in MeOD and  $\text{DMSO-d}_6$  matches that of the **Li(13a)** produced from the oxidation of **Li(12a)** by  $\text{O}_2$  in TFE.

#### Synthesis of $(\text{Ph-C}_6\text{H}_3\text{-dpms})\text{Pt}(\text{H}_2\text{O})$ , **9a**, and $(\text{Ph-C}_6\text{H}_3\text{-dpms})\text{Pt}(\text{PPh}_3)$ , **10a**:

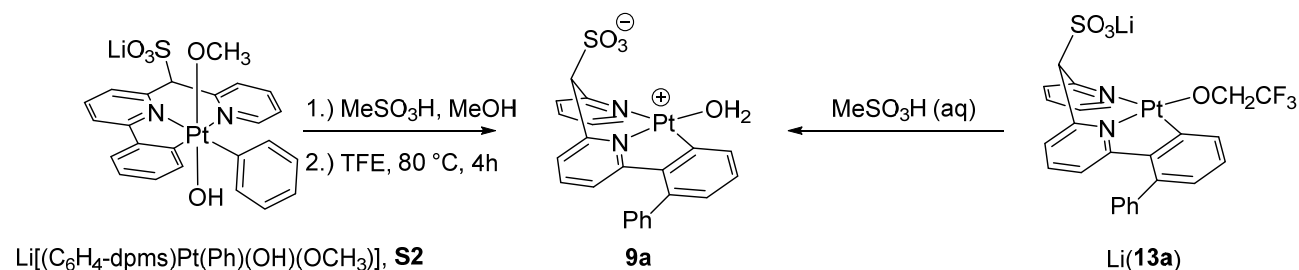

$\text{Li}[(\text{C}_6\text{H}_4\text{-dpms})\text{Pt}(\text{Ph})(\text{OH})(\text{OCH}_3)]$ , **S2**, (224 mg, 0.344 mmol) was dissolved in 3 mL MeOH. To this solution was added 2.3 mL of a 0.150 M methanol solution of  $\text{MeSO}_3\text{H}$  (1 eq.). A large amount of white precipitate formed almost immediately and, after swirling for ~20 seconds, was collected by filtration and washed with 2 mL cold MeOH. The collected solids were then dispersed in 3 mL TFE and transferred to a 25 mL Schlenk tube before being heated at 80 °C for 4 h. The resulting orange-yellow solution was passed through a 0.20  $\mu\text{m}$  Teflon syringe filter and then dried to yield a yellow powder. In an argon filled glovebox, the powder was dissolved in a minimal amount of de-gassed TFE and recrystallized with  $\text{H}_2\text{O}$  to give **9a** as a yellow powder (181 mg, 86%). The  $^1\text{H}$ -NMR analysis presented is of the **9a**-DMSO complex, formed upon dissolution of **9a** in  $\text{DMSO-d}_6$ .

$^1\text{H-NMR}$  (400 MHz, 22 °C, DMSO- $d_6$ ),  $\delta$ : 6.25 (s, 1H), 6.63 (dd,  $^3J_{\text{HH}} = 8.45$  Hz,  $^4J_{\text{HH}} = 1.0$  Hz, 1H), 7.06 (dd,  $^3J_{\text{HH}} = 7.4$ ,  $^4J_{\text{HH}} = 1.0$  Hz, 1H), 7.19-7.31 (broad s, 1H), 7.28 (vt,  $^3J_{\text{HH}} = 7.6$  Hz, 1H), 7.32-7.41 (broad s, 1H), 7.48 (vt,  $^3J_{\text{HH}} = 7.3$  Hz, 1H), 7.49-7.57 (broad s, 1H), 7.58-7.66 (broad s, 1H), 7.65 (dd,  $^3J_{\text{HH}} = 8.1$ ,  $^4J_{\text{HH}} = 1.0$  Hz, 1H), 7.69 (ddd,  $^3J_{\text{HH}} = 8.0$ , 5.5,  $^3J_{\text{HH}} = 1.4$  Hz, 1H), 7.77 (dd,  $^3J_{\text{HH}} = 7.6$ ,  $^3J_{\text{HH}} = 1.1$  Hz, 1H), 7.86 (vt,  $^3J_{\text{HH}} = 7.9$  Hz, 1H), 7.99 (d,  $^3J_{\text{HH}} = 8.0$  Hz, 1H), 8.25 (td,  $^3J_{\text{HH}} = 7.5$ ,  $^4J_{\text{HH}} = 1.5$  Hz, 1H), 9.07 (dd,  $^3J_{\text{HH}} = 6.2$ ,  $^4J_{\text{HH}} = 1.0$  Hz, 1H).

ESI-MS(-) of a solution of **9a** in TFE doped with KOH,  $[\mathbf{9a-H}]^-$ : 612.03. Calculated for  $[\mathbf{9a-H}]^-$ :  $\text{C}_{23}\text{H}_{17}\text{N}_2\text{O}_4\text{PtS}$ , 612.06.

Alternatively, **9a** could be produced from Li(**13a**):

In a vial, Li(**13a**) (8.3 mg, 12  $\mu\text{mol}$ ) was dissolved in 5 mL deionized  $\text{H}_2\text{O}$ . The pH was adjusted to  $\sim 2$  with  $\text{MeSO}_3\text{H}$ , after which a large amount of precipitate was observed. The mixture was left in the fridge for  $\sim 18$  h. The supernatant was then pipetted off and the solids washed with additional deionized  $\text{H}_2\text{O}$  to remove excess acid. The solids were then dried under high vacuum for 24 h. The solids were then dissolved in DMSO- $d_6$  and subsequent  $^1\text{H-NMR}$  analysis showed **9a**-DMSO as the only species present.

Attempts to grow XRD quality crystals of **9a** were unsuccessful.

The  $\text{PPh}_3$  derivative, **10a**, was synthesized by combining **9a** (22 mg, 36  $\mu\text{mol}$ ) in TFE with  $\text{PPh}_3$  (10 mg, 38  $\mu\text{mol}$ ). Removal of solvent yielded an off-white powder that was washed with  $\text{Et}_2\text{O}$  to remove excess  $\text{PPh}_3$ . The residue was then dissolved in DCM, layered with ether, and placed in the freezer for 18 h to yield XRD quality crystals of  $\text{PPh}_3$  derivative **10a**.

#### Synthesis of $\text{Na}[(\text{C}_6\text{H}_4\text{-dpms})\text{Pt}(\text{OCH}_2\text{CF}_3)]$ :

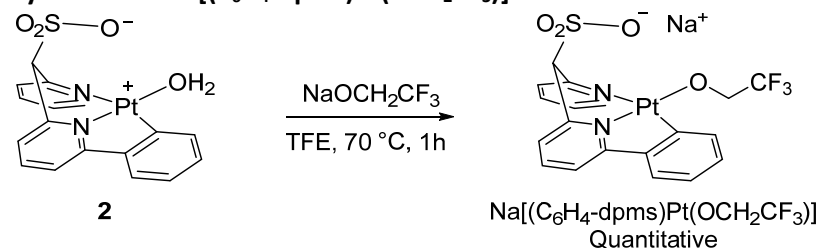

In an argon filled glovebox, **4** (7.0 mg, 13  $\mu\text{mol}$ ) was dissolved in 1.0 mL dry, de-gassed TFE. To the orange-red solution was then added 59  $\mu\text{L}$  of a 0.22 M stock solution of  $\text{NaOCH}_2\text{CF}_3$  in TFE (1 eq.  $\text{NaOCH}_2\text{CF}_3$ ). The solution became yellow in color.  $^1\text{H-NMR}$  analysis showed two species in roughly equal concentration, presumed to be  $\text{Na}[(\text{C}_6\text{H}_4\text{-dpms})\text{Pt}(\text{OCH}_2\text{CF}_3)]$  and the hydroxy analog,  $\text{Na}[(\text{C}_6\text{H}_4\text{-dpms})\text{Pt}(\text{OH})]$ . The solution was heated at 70 °C for 1 h, after which the only complex in solution was  $\text{Na}[(\text{C}_6\text{H}_4\text{-dpms})\text{Pt}(\text{OCH}_2\text{CF}_3)]$  in quantitative yield as assessed using the solvent signal as an internal standard. The solvent was removed under vacuum and the residue dissolved in DMSO- $d_6$  for further  $^1\text{H-NMR}$  analysis.

$^1\text{H-NMR}$  (400 MHz, 22 °C, TFE): 4.37 (m, overlapping w/ solvent peak), 5.72 (s, 1H), 7.20 (vt,  $^3J_{\text{HH}} = 7.8$  Hz, 1H), 7.31 (vt,  $^3J_{\text{HH}} = 7.8$  Hz, 1H), 7.42 (d,  $^3J_{\text{HH}} = 7.8$  Hz, 1H), 7.58 (d,  $^3J_{\text{HH}} = 7.8$  Hz, 1H), 7.62 (vt,  $^3J_{\text{HH}} = 7.8$  Hz, 1H), 7.73 (d,  $^3J_{\text{HH}} = 8.5$  Hz, 1H), 7.78 (d,  $^3J_{\text{HH}} = 7.8$  Hz, 1H), 7.90 (vt,  $^3J_{\text{HH}} = 7.8$  Hz, 1H), 8.02 (vt,  $^3J_{\text{HH}} = 7.7$  Hz, 1H), 9.32 (d,  $^3J_{\text{HH}} = 5.9$  Hz, 1H).

$^1\text{H-NMR}$  (400 MHz, 22 °C, DMSO- $d_6$ ): 4.20 (two overlapping dq,  $^2J_{\text{HH}} = 10.2$  Hz,  $^3J_{\text{HF}} = 9.9$  Hz, 2H), 5.88 (s, 1H), 7.04 (ddd,  $^3J_{\text{HH}} = 7.8$ , 7.5 Hz,  $^4J_{\text{HH}} = 1.1$  Hz, 1H), 7.16 (ddd,  $^3J_{\text{HH}} = 7.8$ , 7.5 Hz,  $^4J_{\text{HH}} = 1.1$  Hz, 1H), 7.43 (dd,  $^3J_{\text{HH}} = 7.5$  Hz,  $^3J_{\text{HH}} = 1.1$  Hz, 1H), 7.51 (dd,  $^3J_{\text{HH}} = 7.5$  Hz,  $^4J_{\text{HH}} = 0.9$  Hz, 1H), 7.61 (m, 2H), 7.79 (d,  $^3J_{\text{HH}} = 7.8$  Hz, 1H), 7.84 (dd,  $^3J_{\text{HH}} = 8.3$  Hz,  $^4J_{\text{HH}} = 1.1$  Hz, 1H), 7.97 (vt,  $^3J_{\text{HH}} = 8.3$ , 7.8 Hz,  $^4J_{\text{HH}} = 1.6$  Hz, 1H), 9.30 (dd,  $^3J_{\text{HH}} = 5.8$  Hz,  $^4J_{\text{HH}} = 1.5$  Hz, 1H).

$^{13}\text{C}$  NMR (125 MHz, 22 °C, DMSO- $d_6$ ),  $\delta$ : 76.1, 117.1, 122.7, 123.1, 123.2, 126.2, 128.4, 129.0, 131.7, 137.0, 137.2, 145.6, 146.0, 152.7, 153.1, 166.8. Two quaternary carbons could not be located due to the low S/N ratio.

ESI-MS(-) of a solution of  $\text{Na}[(\text{C}_6\text{H}_4\text{-dpms})\text{Pt}(\text{OCH}_2\text{CF}_3)]$  in TFE,  $[(\text{C}_6\text{H}_4\text{-dpms})\text{Pt}(\text{OCH}_2\text{CF}_3)]^- = 618.07$ . Calculated for  $[(\text{C}_6\text{H}_4\text{-dpms})\text{Pt}(\text{OCH}_2\text{CF}_3)]^- \text{C}_{19}\text{H}_{14}\text{F}_3\text{N}_2\text{NaO}_4\text{PtS}^-$ , 618.02.

### Synthesis of $(\text{C}_6\text{H}_4\text{-dpms})\text{Pt}^{\text{IV}}(\text{Aryl})(\text{OH})$ Complexes, **7a – 7h**:

**General Method A, 7a – 7e** – Using electron rich arenes:

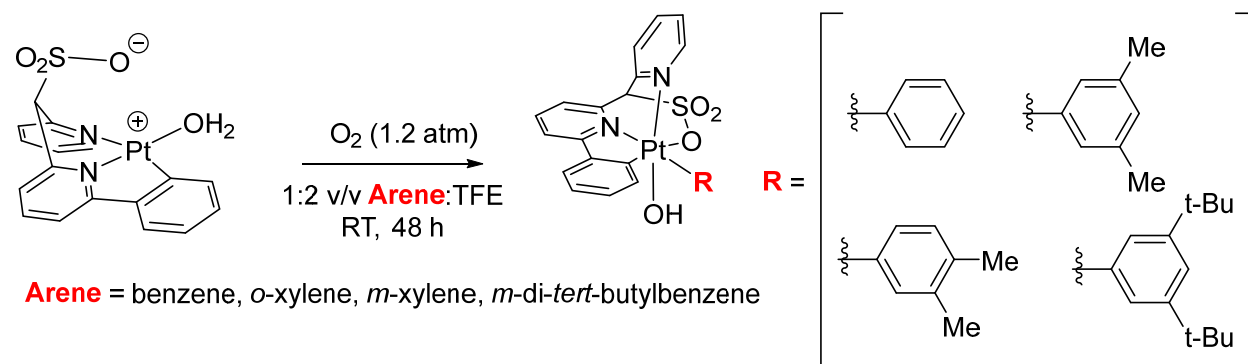

$(\text{C}_6\text{H}_4\text{-dpms})\text{Pt}(\text{H}_2\text{O})$  (13.1 mg, 24.4  $\mu\text{mol}$ ) was weighed out into a 20 mL vial. Under air, TFE (2 mL) was added and the mixture swirled until all solids had dissolved. The appropriate arene (1 mL) was then added and the orange solution transferred to a 25 mL Schlenk tube along with a small Teflon coated stir bar. The Schlenk tube was pressurized with 1 atm  $\text{O}_2$ , bringing the total  $p\text{O}_2$  to  $\sim 1.2$  atm. The reaction was stirred vigorously for 2 days (\*except in the case of *m*-di-*tert*-butylbenzene), showing a color change to deep red/purple over the first hour followed by a slow change to yellow throughout the remainder of the reaction. Some white cloudy precipitate could be observed after the first day.

\*In the case that the arene was *m*-di-*tert*-butylbenzene, the reaction had to be continued for 7 days to see appreciable conversion due to immiscibility with TFE.

A 50  $\mu\text{L}$  aliquot was removed, dried, and redissolved in DMSO- $d_6$  for subsequent  $^1\text{H-NMR}$  analysis to determine the conversion and NMR yield of each product. To isolate the  $\text{LPt}^{\text{IV}}(\text{Aryl})$  product, the solution was first doped with 100  $\mu\text{L}$  of a stock solution of  $\text{KOCH}_2\text{CF}_3$  in TFE (0.31 M, 1.3 eq.) and stirred for an additional few minutes. Avoiding this step results in the simultaneous elution of both  $\text{Pt}^{\text{IV}}$  products off the subsequent silica column. The solvent was then removed *in vacuo* leaving a red residue which was purified by column chromatography on silica (10:1 DCM:MeOH), producing the  $(\text{C}_6\text{H}_4\text{-dpms})\text{Pt}^{\text{IV}}(\text{Aryl})(\text{OH})$  product as a white powder. Further purification was achieved by partially dissolving

the white powder in acetone and layering with pentanes. After being left in the freezer for 12 – 18 h, the supernatant was pipetted off and the white solid dried for 24 h under high vacuum at RT.

**General Method B, 7f- 7g** – Using electron poor arenes:

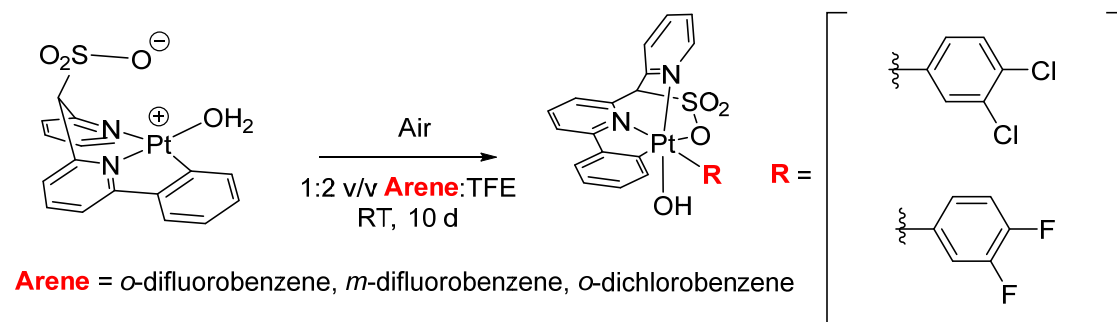

(C<sub>6</sub>H<sub>4</sub>-dpms)Pt(H<sub>2</sub>O) (13.1 mg, 24.4 μmol) was weighed out into a 20 mL vial. Under air, TFE (2 mL) was added and the mixture swirled until all solids had dissolved. The appropriate arene (1 mL) was then added and the orange solution transferred to a 25 mL Schlenk tube along with a small Teflon coated stir bar. The reaction was then stirred vigorously for 10 days under air, showing a color change to deep red/purple over the first hour followed by a slow change to yellow throughout the remainder of the reaction. Some white cloudy precipitate could be observed after one week.

The workup and purification were the same as outlined in General Method A for (C<sub>6</sub>H<sub>4</sub>-dpms)Pt<sup>IV</sup>(Aryl)(OH) complexes derived from electron rich arenes. The results are summarized in Table S1.

**Table S1.** Oxidation with O<sub>2</sub> of complex **4** in TFE : arene 2 : 1 (vol.) mixtures at 20 °C and 1 atm O<sub>2</sub>.

| Arene                                                                             | Yield of <b>7+8+9</b><br>after 1 day <sup>23</sup> | <b>8 / 7 / 9</b> ratio |
|-----------------------------------------------------------------------------------|----------------------------------------------------|------------------------|
| C <sub>6</sub> H <sub>6</sub> <b>5a</b> , C <sub>6</sub> D <sub>6</sub> <b>5b</b> | 68%                                                | 1 / 1 / 0.1            |
| 1,2-Me <sub>2</sub> C <sub>6</sub> H <sub>4</sub> <b>5c</b>                       | 73%                                                | 1 / 1 / 0.1            |
| 1,3-Me <sub>2</sub> C <sub>6</sub> H <sub>4</sub> <b>5d</b>                       | 69%                                                | 1 / 1 / 0.1            |
| 1,3- <i>t</i> -Bu <sub>2</sub> C <sub>6</sub> H <sub>4</sub> <b>5e</b>            | 34%                                                | 1 / 1 / 0.1            |
| 1,2-Cl <sub>2</sub> C <sub>6</sub> H <sub>4</sub> <b>5f</b>                       | 19%                                                | 1 / 0.6 / -            |
| 1,2-F <sub>2</sub> C <sub>6</sub> H <sub>4</sub> <b>5g</b>                        | 23%                                                | 1 / 0.5 / -            |

**(C<sub>6</sub>H<sub>4</sub>-dpms)Pt(C<sub>6</sub>H<sub>5</sub>)(OH), **7a**:**

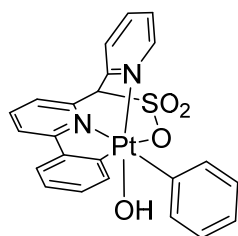

**7a**

The product was prepared according to General Method A, using C<sub>6</sub>H<sub>6</sub> as the arene, R<sub>f</sub>: 0.33. Isolated yield of **7a**: 3.0 mg, 20 %. Analysis by <sup>13</sup>C-NMR was carried out by combining **7a** and **7b** (in approximately 0.25:0.75 ratio) in order to achieve a high enough concentration. <sup>1</sup>H NOE and COSY experiments provided a full proton assignment for **7a** in DMSO-d<sub>6</sub> and are consistent with the solid state structure (Figure S4).

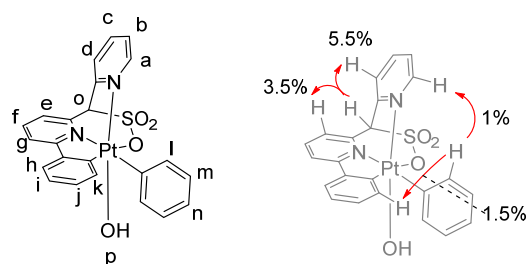

**Figure S4.** Left – proton assignment for <sup>1</sup>H-NMR analysis of **7a**. Right – Spin-spin coupling percentages derived from NOE experiments.

<sup>1</sup>H NMR (600 MHz, 22 °C, DMSO-d<sub>6</sub>), δ: 0.52 (s, 1H<sub>p</sub>), 6.83 (s, 1H<sub>o</sub>), 7.08 (dd, <sup>3</sup>J<sub>HH</sub> = 7.8 Hz, <sup>4</sup>J<sub>HH</sub> = 1.4 Hz, 2H<sub>i</sub>), 7.12 – 7.17 (m, 3H = 2H<sub>m</sub> + 1H<sub>n</sub>), 7.20 (ddd, <sup>3</sup>J<sub>HH</sub> = 7.7, 7.5 Hz, <sup>4</sup>J<sub>HH</sub> = 1.7 Hz, 1H<sub>j</sub>), 7.27 (ddd, <sup>3</sup>J<sub>HH</sub> = 8.4, 7.5 Hz, <sup>4</sup>J<sub>HH</sub> = 1.1 Hz, 1H<sub>i</sub>), 7.33 (dd, <sup>3</sup>J<sub>HH</sub> = 7.7 Hz, <sup>4</sup>J<sub>HH</sub> = 1.1 Hz, 1H<sub>k</sub>), 7.55 (ddd, <sup>3</sup>J<sub>HH</sub> = 7.5, 6.6 Hz, <sup>4</sup>J<sub>HH</sub> = 1.5 Hz, 1H<sub>b</sub>), 7.87 (dd, <sup>3</sup>J<sub>HH</sub> = 7.0 Hz, <sup>4</sup>J<sub>HH</sub> = 1.6 Hz, 1H<sub>e</sub>), 7.92 (dd, <sup>3</sup>J<sub>HH</sub> = 7.5 Hz, <sup>4</sup>J<sub>HH</sub> = 1.6 Hz, 1H<sub>h</sub>), 8.05 (dd, <sup>3</sup>J<sub>HH</sub> = 7.9 Hz, <sup>4</sup>J<sub>HH</sub> = 1.1 Hz, H<sub>d</sub>), 8.26 (ddd, <sup>3</sup>J<sub>HH</sub> = 8.3, 7.6 Hz, <sup>4</sup>J<sub>HH</sub> = 1.4 Hz, 1H<sub>c</sub>), 8.28 – 8.32 (m, 2H = H<sub>f</sub> + H<sub>g</sub>), 8.46 (dd, <sup>3</sup>J<sub>HH</sub> = 5.8 Hz, <sup>4</sup>J<sub>HH</sub> = 1.6 Hz, <sup>3</sup>J<sub>HPt</sub> = 26.5 Hz, 1H<sub>a</sub>).

<sup>1</sup>H NMR (600 MHz, 22 °C, TFE-d<sub>1</sub>), δ: 6.18 (s, 1H), 7.12 (d, <sup>3</sup>J<sub>HH</sub> = 6.9 Hz, 2H), 7.25 (m, 3H), 7.31 (dd, <sup>3</sup>J<sub>HH</sub> = 7.0, 6.8 Hz, 1H), 7.33 (dd, <sup>3</sup>J<sub>HH</sub> = 7.5, 6.8 Hz, 1H), 7.38 (dd, <sup>3</sup>J<sub>HH</sub> = 7.7, 6.7 Hz, 1H), 7.51 (d, <sup>3</sup>J<sub>HH</sub> = 7.9 Hz, 1H), 7.73 (dd, <sup>3</sup>J<sub>HH</sub> = 7.8 Hz, <sup>4</sup>J<sub>HH</sub> = 1.2 Hz, 1H), 7.76 (d, <sup>3</sup>J<sub>HH</sub> = 7.6 Hz, 1H), 7.89 (d, <sup>3</sup>J<sub>HH</sub> = 8.0 Hz, 1H), 7.99 (d, <sup>3</sup>J<sub>HH</sub> = 8.2 Hz, 1H), 8.10 (ddd, <sup>3</sup>J<sub>HH</sub> = 8.2, 7.8 Hz, <sup>4</sup>J<sub>HH</sub> = 1.2 Hz, 1H), 8.13 (dd, <sup>3</sup>J<sub>HH</sub> = 8.7, 8.0 Hz, 1H), 8.46 (d, <sup>3</sup>J<sub>HH</sub> = 5.6 Hz, 1H).

<sup>13</sup>C-NMR (151 MHz, 22 °C, DMSO-d<sub>6</sub>), δ: 72.2, 120.0, 123.6, 124.9, 125.1, 126.1, 126.2, 127.0, 127.2, 129.4, 130.1, 131.5, 132.2, 133.8, 134.3, 137.1, 142.6, 142.9, 143.8, 151.0, 152.9, 153.2, 160.0.

ESI(+)-MS of **7a** in TFE/H<sub>2</sub>O doped with dilute HBF<sub>4</sub> [**7a**+H]<sup>+</sup> : 614.14. Calculated for [**7a**+H]<sup>+</sup>: C<sub>23</sub>H<sub>19</sub>N<sub>2</sub>O<sub>4</sub>PtS, 614.07.

The product was prepared according to General Method A, using C<sub>6</sub>D<sub>6</sub> as the arene, Rf:0.33. Isolated yield of **7b**: 3.3 mg, 24 %. Isolated samples of **7b** consistently had a ~15% proton incorporation into the phenyl ring, likely originating from H/D exchange between C<sub>6</sub>D<sub>6</sub> and TFE prior to oxidation.

<sup>13</sup>C-NMR (151 MHz, 22 °C, DMSO-d<sub>6</sub>), δ: 72.2, 120.0, 123.6, 124.9, 125.1, 126.1, 126.2, 127.0, 127.2, 129.4, 130.1, 131.5, 132.2, 133.8, 134.3, 137.1, 142.6, 142.9, 143.8, 151.0, 152.9, 153.2, 160.0.

**(C<sub>6</sub>H<sub>4</sub>-dpms)Pt(3,4-dimethylphenyl)(OH), 7c:**

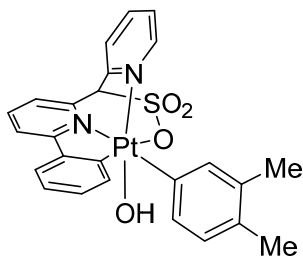

**7c**

<sup>1</sup>H NMR (600 MHz, 22 °C, DMSO-d<sub>6</sub>) δ: 0.32 (s, 1H), 2.17 (s, 3H), 2.22 (s, 3H), 6.73 (dd, <sup>3</sup>J<sub>HH</sub> = 8.0 Hz, <sup>4</sup>J<sub>HH</sub> = 1.6 Hz, 1H), 6.85 (s, 1H), 6.85 (d, <sup>3</sup>J<sub>HH</sub> = 8.6 Hz, 1H), 6.90 (d, <sup>3</sup>J<sub>HH</sub> = 8.0 Hz, 1H), 7.18 (ddd, <sup>3</sup>J<sub>HH</sub> = 8.1, 7.6 Hz, <sup>4</sup>J<sub>HH</sub> = 1.5 Hz, 1H), 7.25 (ddd, <sup>3</sup>J<sub>HH</sub> = 8.1, 7.4 Hz, <sup>4</sup>J<sub>HH</sub> = 1.1 Hz, 1H), 7.33 (dd, <sup>3</sup>J<sub>HH</sub> = 8.0 Hz, <sup>4</sup>J<sub>HH</sub> = 1.1 Hz, 1H), 7.54 (ddd, <sup>3</sup>J<sub>HH</sub> = 7.8, 6.8 Hz, <sup>4</sup>J<sub>HH</sub> = 1.4 Hz), 7.86 (dd, <sup>3</sup>J<sub>HH</sub> = 7.2 Hz, <sup>4</sup>J<sub>HH</sub> = 1.2 Hz, 1H), 7.91 (dd, <sup>3</sup>J<sub>HH</sub> = 7.5 Hz, <sup>4</sup>J<sub>HH</sub> = 1.6 Hz, 1H), 8.04 (dd, <sup>3</sup>J<sub>HH</sub> = 7.9 Hz, <sup>4</sup>J<sub>HH</sub> = 1.2 Hz, 1H), 8.25 (ddd, <sup>3</sup>J<sub>HH</sub> = 8.3, 7.7 Hz, <sup>4</sup>J<sub>HH</sub> = 1.7 Hz, 1H), 8.26 – 8.31 (m, 2H), 8.47 (dd, <sup>3</sup>J<sub>HH</sub> = 5.8 Hz, <sup>4</sup>J<sub>HH</sub> = 1.4 Hz, 1H).

<sup>1</sup>H NMR (600 MHz, 22 °C, CF<sub>3</sub>CH<sub>2</sub>OD), δ: 2.26 (s, 3H), 2.30 (s, 3H), 6.17 (s, 1H), 6.77 (d, <sup>3</sup>J<sub>HH</sub> = 7.4 Hz, 1H), 6.91 (s, 1H), 7.25 (dd, <sup>3</sup>J<sub>HH</sub> = 9.0, 8.0 Hz, 1H), 7.32 (dd, <sup>3</sup>J<sub>HH</sub> = 8.0, 7.5 Hz, 1H), 7.37 (dd, <sup>3</sup>J<sub>HH</sub> = 7.9, 6.9 Hz,

1H), 7.53 (d,  $^3J_{\text{HH}} = 8.0$  Hz, 1H), 7.73 (d,  $^3J_{\text{HH}} = 7.5$  Hz, 1H), 7.75 (d,  $^3J_{\text{HH}} = 7.7$  Hz, 1H), 7.88 (d,  $^3J_{\text{HH}} = 7.7$  Hz, 1H), 7.99 (d,  $^3J_{\text{HH}} = 8.2$  Hz, 1H), 8.09 (dd,  $^3J_{\text{HH}} = 8.1$ , 7.5 Hz, 1H), 8.13 (dd,  $^3J_{\text{HH}} = 8.6$ , 8.0 Hz, 1H), 8.49 (d,  $^3J_{\text{HH}} = 5.6$  Hz, 1H).

ESI(+)-MS of **7c** in TFE/H<sub>2</sub>O doped with dilute HBF<sub>4</sub> [**7c**+H]<sup>+</sup> : 642.11. Calculated for [**7c**+H]<sup>+</sup>: C<sub>25</sub>H<sub>23</sub>N<sub>2</sub>O<sub>4</sub>PtS, 642.10.

**(C<sub>6</sub>H<sub>4</sub>-dpms)Pt(3,5-dimethylphenyl)(OH), 7d:**

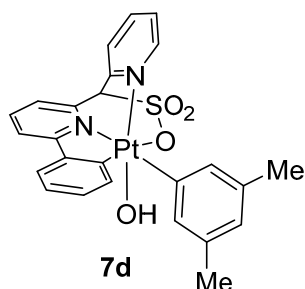

Product was prepared according to General Method A, Rf: 0.36. Samples of the crude reaction mixture in DMSO-d<sub>6</sub> showed that **7d** is the major LPt<sup>IV</sup>(Aryl) isomer by no less than 90 %. Isolated yield: 27 %.

<sup>1</sup>H NMR (600 MHz, 22 °C, DMSO-d<sub>6</sub>) δ: 0.34 (s, 1H), 2.21 (s, 6H), 6.67 (brs, 2H), 6.81 (s, 1H), 6.86 (s, 1H), 7.18 (ddd,  $^3J_{\text{HH}} = 8.3$ , 7.6 Hz,  $^4J_{\text{HH}} = 1.5$  Hz, 1H), 7.25 (ddd,  $^3J_{\text{HH}} = 7.4$ , 7.2 Hz,  $^4J_{\text{HH}} = 1.1$  Hz, 1H), 7.32 (dd,  $^3J_{\text{HH}} = 8.0$  Hz,  $^4J_{\text{HH}} = 1.1$  Hz, 1H), 7.55 (ddd,  $^3J_{\text{HH}} = 7.0$ , 6.8 Hz,  $^4J_{\text{HH}} = 1.4$  Hz, 1H), 7.86 (dd,  $^3J_{\text{HH}} = 7.1$  Hz,  $^4J_{\text{HH}} = 1.4$  Hz, 1H), 7.91 (dd,  $^3J_{\text{HH}} = 7.6$  Hz,  $^4J_{\text{HH}} = 1.6$  Hz, 1H), 8.04 (dd,  $^3J_{\text{HH}} = 7.9$  Hz,  $^4J_{\text{HH}} = 1.1$  Hz, 1H), 8.26 (ddd,  $^3J_{\text{HH}} = 8.1$ , 7.8 Hz,  $^4J_{\text{HH}} = 1.6$  Hz, 1H), 8.26 – 8.30 (m, 2H), 8.47 (dd,  $^3J_{\text{HH}} = 5.9$ ,  $^4J_{\text{HH}} = 1.9$  Hz, 1H).

<sup>1</sup>H NMR (600 MHz, 22 °C, CF<sub>3</sub>CH<sub>2</sub>OD), δ: 2.28 (s, 6H), 6.16 (s, 1H), 6.72 (s, 2H), 6.99 (s, 1H), 7.25 (dd,  $^3J_{\text{HH}} = 8.5$ , 7.6 Hz, 1H), 7.32 (dd,  $^3J_{\text{HH}} = 7.7$ , 7.5 Hz, 1H), 7.38 (dd,  $^3J_{\text{HH}} = 7.8$ , 7.2 Hz, 1H), 7.52 (d,  $^3J_{\text{HH}} = 8.0$  Hz, 1H), 7.72 (d,  $^3J_{\text{HH}} = 8.0$  Hz, 1H), 7.75 (d,  $^3J_{\text{HH}} = 7.8$  Hz, 1H), 7.88 (d,  $^3J_{\text{HH}} = 7.8$  Hz, 1H), 7.99 (d,  $^3J_{\text{HH}} = 8.0$  Hz, 1H), 8.09 (ddd,  $^3J_{\text{HH}} = 8.4$ , 8.0 Hz,  $^4J_{\text{HH}} = 1.1$  Hz, 1H), 8.13 (dd,  $^3J_{\text{HH}} = 9.0$ , 8.0 Hz), 8.48 (d,  $^3J_{\text{HH}} = 5.8$  Hz, 1H).

ESI(+)-MS of **7d** in TFE/H<sub>2</sub>O doped with dilute HBF<sub>4</sub> [**7d**+H]<sup>+</sup> : 642.00. Calculated for [**7d**+H]<sup>+</sup>: C<sub>25</sub>H<sub>23</sub>N<sub>2</sub>O<sub>4</sub>PtS, 642.10.



**(C<sub>6</sub>H<sub>4</sub>-dpms)Pt(3,5-di-*tert*-butylphenyl)(OH), 7e:**

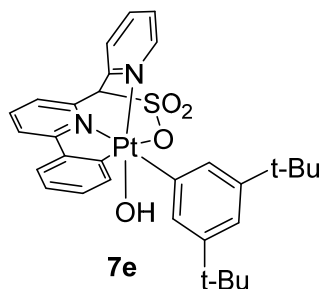

The product was prepared according to General Method A (except with a longer reaction time of one week) using *m*-di-*tert*-butylbenzene (which is immiscible in TFE) as the arene, Rf: 0.38. Samples of the crude reaction mixture in DMSO-*d*<sub>6</sub> showed that **7e** is the only visible LPt<sup>IV</sup>(Aryl) isomer.

Yield: 5.1 mg, 29 %.

<sup>1</sup>H NMR (600 MHz, 22 °C, DMSO-*d*<sub>6</sub>) δ: 0.43 (s, 1H), 1.23 (s, 18H), 6.86 (s, 1H), 6.90 (brs, 2H), 7.15 – 7.20 (m, 2H), 7.26 (ddd, <sup>3</sup>J<sub>HH</sub> = 8.0, 7.5 Hz, <sup>4</sup>J<sub>HH</sub> = 1.0 Hz, 1H), 7.37 (dd, <sup>3</sup>J<sub>HH</sub> = 8.0 Hz, <sup>4</sup>J<sub>HH</sub> = 1.0 Hz, 1H), 7.53 (ddd, <sup>3</sup>J<sub>HH</sub> = 7.7, 6.7 Hz, <sup>4</sup>J<sub>HH</sub> = 1.4 Hz, 1H), 7.88 (dd, <sup>3</sup>J<sub>HH</sub> = 7.4 Hz, <sup>4</sup>J<sub>HH</sub> = 1.1 Hz, 1H), 7.93 (dd, <sup>3</sup>J<sub>HH</sub> = 7.8 Hz, <sup>4</sup>J<sub>HH</sub> = 1.6 Hz, 1H), 8.04 (dd, <sup>3</sup>J<sub>HH</sub> = 8.0 Hz, <sup>4</sup>J<sub>HH</sub> = 1.1 Hz, 1H), 8.26 (ddd, <sup>3</sup>J<sub>HH</sub> = 8.3, 7.9 Hz, <sup>4</sup>J<sub>HH</sub> = 1.6 Hz, 1H), 8.28 (dd, <sup>3</sup>J<sub>HH</sub> = 8.3, 7.7 Hz, 1H), 8.30 (ddd, <sup>3</sup>J<sub>HH</sub> = 8.3, 8.3 Hz, <sup>4</sup>J<sub>HH</sub> = 1.1 Hz, 1H), 8.39 (dd, <sup>3</sup>J<sub>HH</sub> = 5.8 Hz, <sup>4</sup>J<sub>HH</sub> = 1.5 Hz, 1H).

<sup>1</sup>H NMR (600 MHz, 22 °C, CF<sub>3</sub>CH<sub>2</sub>OD), δ: 1.30 (s, 18H), 6.16 (s, 1H), 6.98 (bs, 2H), 7.25 (dd, <sup>3</sup>J<sub>HH</sub> = 8.4, 7.4 Hz, 1H), 7.33 (dd, <sup>3</sup>J<sub>HH</sub> = 7.8, 7.4 Hz, 1H), 7.35 (dd, <sup>3</sup>J<sub>HH</sub> = 7.4, 7.3 Hz, 1H), 7.48 (s, 1H), 7.58 (d, <sup>3</sup>J<sub>HH</sub> = 8.0 Hz, 1H), 7.74 (dd, <sup>3</sup>J<sub>HH</sub> = 7. Hz, <sup>4</sup>J<sub>HH</sub> = 0.9 Hz, 1H), 7.76 (d, <sup>3</sup>J<sub>HH</sub> = 7.6 Hz, 1H), 7.88 (d, <sup>3</sup>J<sub>HH</sub> = 8.0 Hz, 1H), 8.00 (d, <sup>3</sup>J<sub>HH</sub> = 8.0 Hz, 1H), 8.09 (ddd, <sup>3</sup>J<sub>HH</sub> = 8.4, 8.5 Hz, <sup>4</sup>J<sub>HH</sub> = 1.0 Hz, 1H), 8.13 (dd, <sup>3</sup>J<sub>HH</sub> = 8.4, 8.0 Hz, 1H), 8.45 (d, <sup>3</sup>J<sub>HH</sub> = 5.5 Hz, 1H).

ESI(+)-MS of **7e** in TFE/H<sub>2</sub>O doped with dilute HBF<sub>4</sub> [**7e**+H]<sup>+</sup> : 726.21. Calculated for [**7e**+H]<sup>+</sup>: C<sub>31</sub>H<sub>35</sub>N<sub>2</sub>O<sub>4</sub>PtS, 726.20.

**(C<sub>6</sub>H<sub>4</sub>-dpms)Pt(3,4-dichlorophenyl)(OH), 7f:**

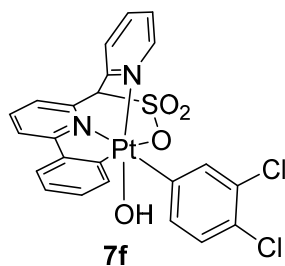

The product was prepared according to General Method B using *o*-dichlorobenzene as the arene, Rf: 0.36. Samples of the crude reaction mixture in DMSO-*d*<sub>6</sub> showed that **7f** is the major LPt<sup>IV</sup>(Aryl) isomer by no less than 90 %. Isolated yield: 3.2 mg, 19 %.

<sup>1</sup>H NMR (600 MHz, 22 °C, DMSO-*d*<sub>6</sub>) δ: 1.14 (brs, 1H), 6.90 (s, 1H), 7.00 (dd, <sup>3</sup>J<sub>HH</sub> = 8.3 Hz, <sup>4</sup>J<sub>HH</sub> = 2.0 Hz, 1H), 7.21 (m, 1H), 7.24 – 7.30 (m, 3H), 7.42 (d, <sup>3</sup>J<sub>HH</sub> = 8.4 Hz, 1H), 7.57 (ddd, <sup>3</sup>J<sub>HH</sub> = 7.6, 6.7 Hz, <sup>4</sup>J<sub>HH</sub> = 1.4

Hz, 1H), 7.87 (dd,  $^3J_{\text{HH}} = 6.5$  Hz,  $^4J_{\text{HH}} = 2.0$  Hz, 1H), 7.93 (dd,  $^3J_{\text{HH}} = 7.8$  Hz,  $^4J_{\text{HH}} = 1.6$  Hz, 1H), 8.07 (dd,  $^3J_{\text{HH}} = 7.9$  Hz,  $^4J_{\text{HH}} = 1.2$  Hz, 1H), 8.28 (ddd,  $^3J_{\text{HH}} = 7.9$ , 7.9 Hz,  $^4J_{\text{HH}} = 1.6$  Hz, 1H), 8.27 – 8.32 (m, 2H), 8.55 (dd,  $^3J_{\text{HH}} = 5.8$  Hz,  $^4J_{\text{HH}} = 1.1$  Hz, 1H).

$^1\text{H}$  NMR (600 MHz, 22 °C,  $\text{CF}_3\text{CH}_2\text{OD}$ ),  $\delta$ : 6.20 (s, 1H), 6.98 (dd,  $^3J_{\text{HH}} = 8.4$  Hz,  $^4J_{\text{HH}} = 1.8$  Hz, 1H), 7.27 (m, 2H), 7.34 (m, 2H), 7.39 (d,  $^3J_{\text{HH}} = 8.0$  Hz, 1H), 7.42 (dd,  $^3J_{\text{HH}} = 7.4$ , 7.0 Hz, 1H), 7.74 (d,  $^3J_{\text{HH}} = 7.6$  Hz, 1H), 7.77 (d,  $^3J_{\text{HH}} = 7.77$  Hz, 1H), 7.94 (d,  $^3J_{\text{HH}} = 7.9$  Hz, 1H), 7.99 (d,  $^3J_{\text{HH}} = 8.4$  Hz, 1H), 8.13 (m, 2H), 8.41 (d,  $^3J_{\text{HH}} = 5.7$  Hz, 1H).

ESI(+)-MS of **7f** in TFE/ $\text{H}_2\text{O}$  doped with dilute  $\text{HBF}_4$  [**7f**+H] $^+$  : 650.02. Calculated for [**7f**+H] $^+$ : 682.06.  $\text{C}_{23}\text{H}_{17}\text{Cl}_2\text{N}_2\text{O}_4\text{PtS}$ , 681.99.

**(C<sub>6</sub>H<sub>4</sub>-dpms)Pt(3,4-difluorophenyl)(OH), **7g**:**

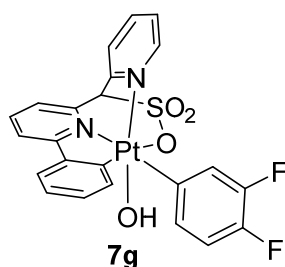

The product was prepared according to General Method B using *o*-difluorobenzene as the arene, Rf: 0.25. Samples of the crude reaction mixture in  $\text{DMSO}-d_6$  showed that **7g** is the major  $\text{LPt}^{\text{IV}}(\text{Aryl})$  isomer by no less than 66 %. A third bridging methine singlet was observed, not attributable to **7g** nor **8**, present in half the amount of **7g**, and may be attributable to a second  $\text{LPt}^{\text{IV}}(\text{Aryl})$  isomer derived from C-H activation *ortho* to a C-F bond on *o*-difluorobenzene (Figure S5).

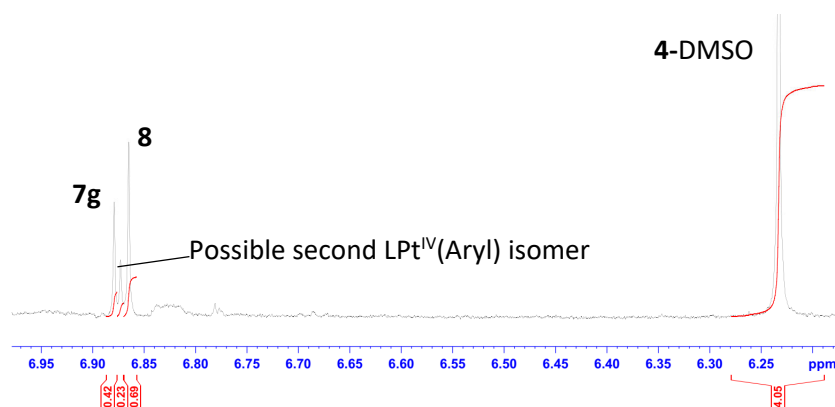

**Figure S5.** Bridging methine C-H region of  $^1\text{H}$ -NMR spectrum derived from the crude reaction mixture from the reaction of **4** with  $\text{O}_2$  in 1:2 *o*-difluorobenzene:TFE mixture, dissolved in  $\text{DMSO}-d_6$  showing **7g**, 4-DMSO, and the possible second  $\text{LPt}^{\text{IV}}(\text{Aryl})$  isomer.

Isolated yield: 2.3 mg, 14 %.

$^1\text{H}$  NMR (600 MHz, 22 °C,  $\text{DMSO}-d_6$ )  $\delta$ : 1.06 (s, 1H), 6.82 (m, 1H), 6.89 (s, 1H), 7.02 (ddd,  $^3J_{\text{HH(F)}} = 11.3$ , 8.4 Hz,  $^4J_{\text{HH}} = 1.9$  Hz, 1H), 7.20 – 7.30 (m, 4H), 7.57 (ddd,  $^3J_{\text{HH}} = 7.2$ , 6.7 Hz,  $^4J_{\text{HH}} = 1.5$  Hz, 1H), 7.87 (dd,  $^3J_{\text{HH}} =$

6.8 Hz,  $^4J_{\text{HH}} = 1.8$  Hz, 1H), 7.93 (dd,  $^3J_{\text{HH}} = 7.88$ ,  $^4J_{\text{HH}} = 1.3$  Hz, 1H), 8.06 (dd,  $^3J_{\text{HH}} = 7.8$  Hz,  $^4J_{\text{HH}} = 1.4$ , 1H), 8.27 (ddd,  $^3J_{\text{HH}} = 7.8$ , 7.8 Hz,  $^4J_{\text{HH}} = 1.6$  Hz, 1H), 8.27 – 8.32 (m, 2H), 8.52 (dd,  $^3J_{\text{HH}} = 5.9$  Hz,  $^4J_{\text{HH}} = 1.5$  Hz).

$^1\text{H}$  NMR (600 MHz, 22 °C,  $\text{CF}_3\text{CH}_2\text{OD}$ ),  $\delta$ : 6.20 (s, 1H), 6.85 (m, 1H), 6.98 (ddd,  $^3J_{\text{HH(F)}} = 11.3$ , 8.5 Hz,  $^4J_{\text{HH}} = 1.9$  Hz, 1H), 7.10 (m, 1H), 7.27 (ddd,  $^3J_{\text{HH}} = 8.8$ , 7.9 Hz,  $^4J_{\text{HH}} = 1.3$  Hz, 1H), 7.34 (dd,  $^3J_{\text{HH}} = 7.8$ , 7.4 Hz, 1H), 7.42 (m, 2H), 7.74 (dd,  $^3J_{\text{HH}} = 7.7$  Hz,  $^4J_{\text{HH}} = 1.2$  Hz, 1H), 7.77 (d,  $^3J_{\text{HH}} = 7.6$  Hz, 1H), 7.91 (d,  $^3J_{\text{HH}} = 7.9$  Hz, 1H), 7.99 (d,  $^3J_{\text{HH}} = 8.1$  Hz, 1H), 8.12 (ddd,  $^3J_{\text{HH}} = 8.0$ , 7.7 Hz,  $^4J_{\text{HH}} = 1.3$  Hz, 1H), 8.15 (dd,  $^3J_{\text{HH}} = 7.9$ , 7.0 Hz, 1H), 8.42 (d,  $^3J_{\text{HH}} = 5.9$  Hz, 1H).

$^{19}\text{F}$  NMR (376 MHz, 22 °C, Acetone- $\text{d}_6$ ),  $\delta$ : -146.5 (m, 1F), -142.0 (m, 1F).

ESI(+)-MS of **7g** in TFE/ $\text{H}_2\text{O}$  doped with dilute  $\text{HBF}_4$  [**7g**+H] $^+$ : 650.02. Calculated for [**7g**+H] $^+$ :  $\text{C}_{23}\text{H}_{17}\text{F}_2\text{N}_2\text{O}_4\text{PtS}$ , 650.05.

## IV. Reaction of (C<sub>6</sub>H<sub>4</sub>-dpms)Pt<sup>II</sup>(H<sub>2</sub>O), **4**, with O<sub>2</sub> in TFE

### a. Long-term monitoring of the reaction between [**4**] and O<sub>2</sub> in wet TFE:

(C<sub>6</sub>H<sub>4</sub>-dpms)Pt(H<sub>2</sub>O), **4**, (4.0 mg, 7.4 μmol) was dissolved in 0.55 mL anhydrous TFE and then doped with 50 μL of a 2.0 M solution of H<sub>2</sub>O in TFE. The yellow solution was transferred to a sealable NMR J-Young tube along with a sealed capillary containing D<sub>2</sub>O for locking and shimming purposes. After initial analysis by <sup>1</sup>H-NMR, the tube was pressurized with O<sub>2</sub> and analyzed periodically by <sup>1</sup>H-NMR. The solution became dark purple-red over the course of 0.5 h and then gradually changed to light yellow over the next 7 days. A very small amount of white precipitate could be observed after the first week of analysis. The starting material, **4**, along with the Pt(IV) product **8** and the adduct **11** (which is derived from the reversible reaction between **4** and **8**) were tracked via their diagnostic bridging C-H singlets (Fig. S6a).

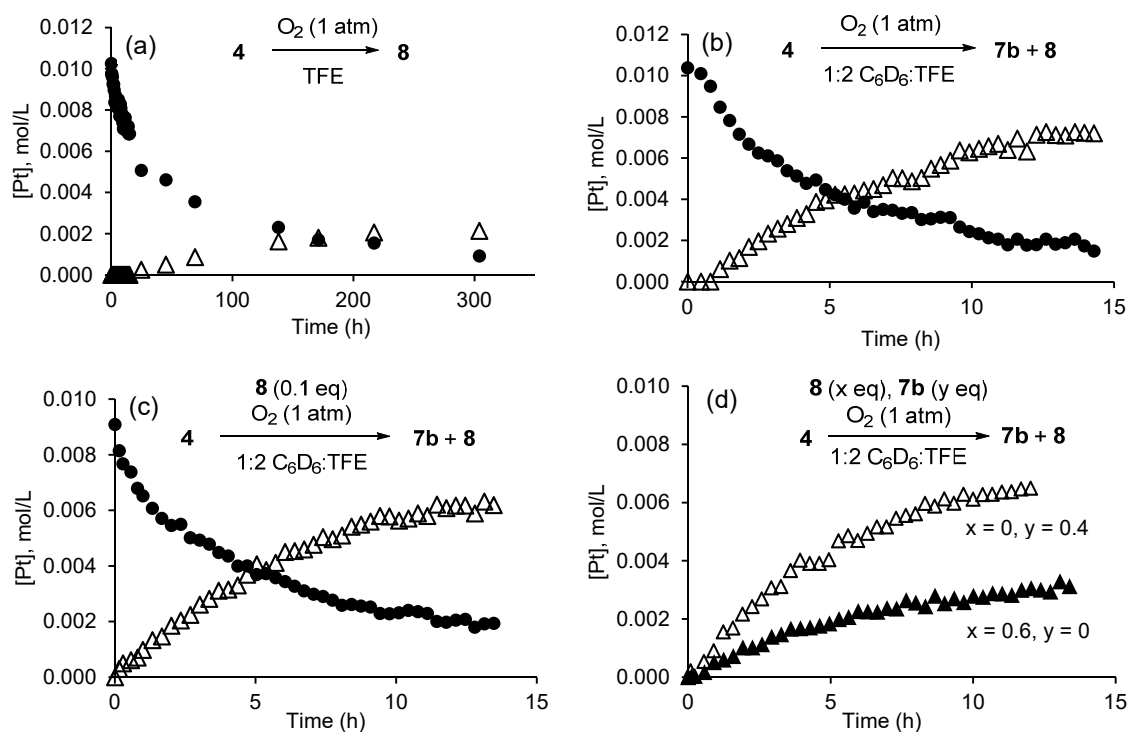

**Figure S6.** The reaction profile for the oxidation of ~10 mM complex **4** (filled circles) with O<sub>2</sub> to produce Pt<sup>IV</sup> complexes **7b** and **8** (triangles): a) in wet TFE; b-d) in wet benzene – TFE mixture (1 : 2, vol.), b) no additives, c) 0.1 eq of **8** added in the beginning, d) 0.6 eq of **8** (filled triangles) vs 0.4 eq of **7b** (open triangles) added in the beginning. The values [**7b**] + [**8**] shown exclude **7b** and/or **8** added in the beginning in the experiments c), b) and d). [H<sub>2</sub>O] = 0.150 M and pO<sub>2</sub> = 1 atm in all cases.



**Notable changes to our previous work.** First, in our previous work <sup>2</sup> we used DMSO-*d*<sub>6</sub> as an NMR solvent to follow progress of the 1<sup>st</sup> reaction in Fig. S7 by <sup>1</sup>H NMR after removing TFE solvent from a reaction mixture aliquot. Later we have found that DMSO efficiently and rapidly destroys the paramagnetic intermediates so that their actual contribution to the reaction mass balance was underestimated/unknown to us at that time. Second, the 1<sup>st</sup> reaction in Fig. S7 was claimed to proceed only under ambient light. Later this conclusion was recognized as one resulting from the presence of some specific impurities in the starting material. The reaction with pure complex **4** does not require light.

**b. Reversibility of the initial reaction between [4] and O<sub>2</sub> in TFE:**

(C<sub>6</sub>H<sub>4</sub>-dpms)Pt(H<sub>2</sub>O), **4**, (4.0 mg, 7.4 μmol) was dissolved in 0.60 mL anhydrous TFE-*d*<sub>1</sub> and then transferred to a sealable NMR J-Young tube along with a sealed capillary tube filled with D<sub>2</sub>O for locking and shimming purposes. After initial analysis by <sup>1</sup>H-NMR, the tube was pressurized with 1 atm pO<sub>2</sub> and monitored for 3 h, during which time the mole % of **4** fell from 37 % to 12 % while the appearance of only one NMR visible intermediate, **S3**, was observed which rose to 10 mole %. The other species, present in the initial mixture is LPt(TFE) which gives rise to broad peaks and made up the other 63 % of total LPt<sup>II</sup> in solution. Upon addition of O<sub>2</sub>, the <sup>1</sup>H-NMR peaks corresponding to LPt(TFE) quickly broaden so as to become unintegrable (Figure S6). Assuming that LPt(TFE) and **4** are in fast equilibrium (compared to the initial reaction with O<sub>2</sub>), then the total NMR visible content in solution may be assumed to have fallen by 40 %.

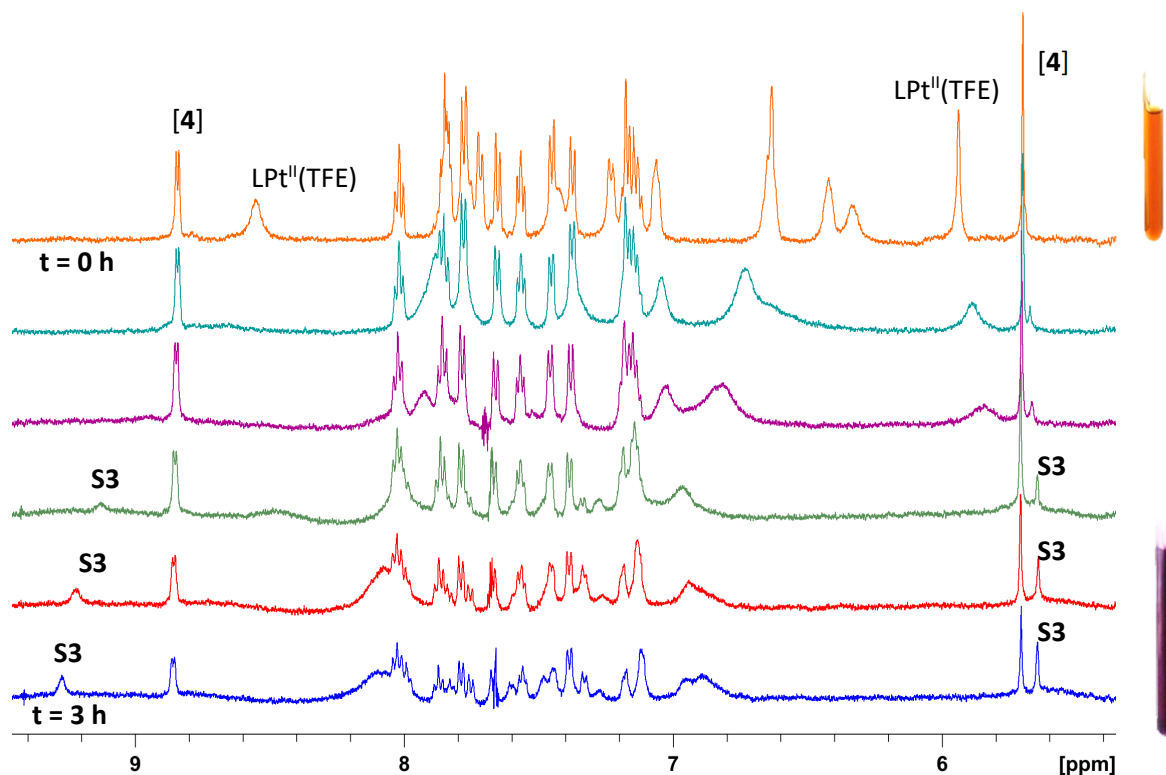

**Figure S6.**  $^1\text{H}$ -NMR spectra showing the first 3 h of the reaction between **4** and  $\text{O}_2$  in anhydrous  $\text{TFE-d}_1$ . The top trace is  $t = 0\text{ h}$  while the bottom trace is  $t = 3\text{ h}$ , taken in 0.6 h increments. On the right, the color of solution is shown.

After 3 h, the now purple solution was doped with  $\text{H}_2\text{O}$  (5  $\mu\text{L}$ ), bringing the internal concentration of  $\text{H}_2\text{O}$  to 0.5 M. The color changed almost immediately to light pink and then eventually to yellow. The reaction mixture was then monitored by  $^1\text{H}$ -NMR which showed **[4]** rise to about 92 mole % while the methine singlet belonging to the intermediate, **S3**, disappeared (Figure S7). The aromatic portion of the  $^1\text{H}$ -NMR spectrum taken 18 h after addition of  $\text{H}_2\text{O}$  is shown in Figure S8.

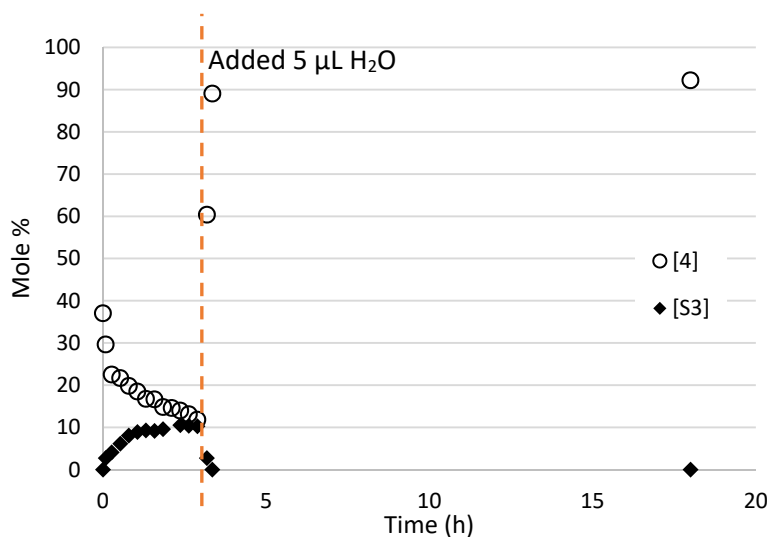

**Figure S7.** Reaction profiles showing [4] and initial unidentified intermediate [S3] after exposure of 0.6 mL anhydrous TFE solution of **4** to O<sub>2</sub> for 3 h followed by addition of 5 µL of H<sub>2</sub>O.

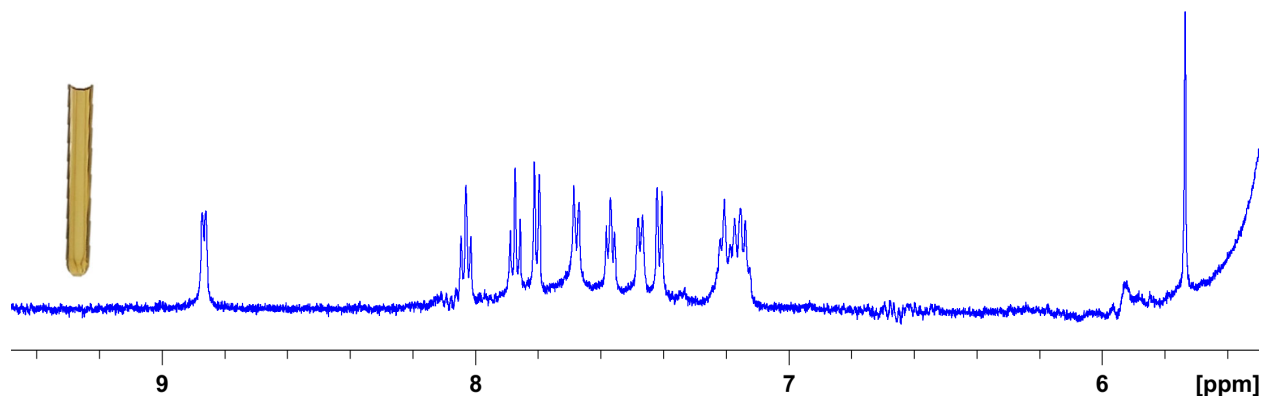

**Figure S8.** Aromatic region of <sup>1</sup>H-NMR spectrum 18 h after adding 5 µL H<sub>2</sub>O to reaction between **4** and O<sub>2</sub> in TFE, showing that the only NMR visible species is **4** and the solution color is yellow.

**c. Equilibrium formation of 11 from 8 and 4:**

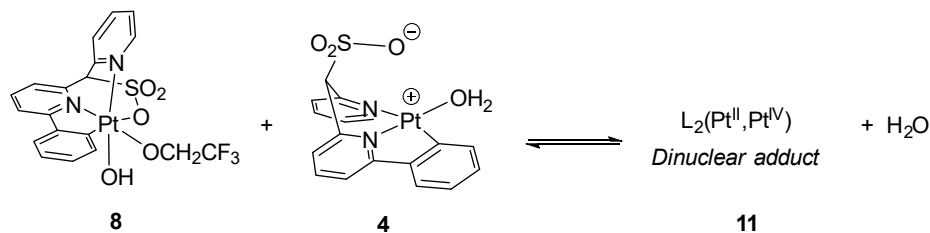

When **8** and **4** are both present in TFE, a third species, **11**, is always observed to form which we propose to be an adduct of **8** and **4**. To find the  $K_{\text{eq}}$ , (C<sub>6</sub>H<sub>4</sub>-dpms)Pt(H<sub>2</sub>O), **4**, (1.7 mg, 3.1 µmol) was dissolved in 0.5 mL de-gassed TFE-d<sub>1</sub> under argon and then doped with 0.150 M D<sub>2</sub>O. A second solution, containing 5.7 mM **8** and 0.150 M D<sub>2</sub>O in TFE-d<sub>1</sub> was prepared. The first solution containing **4** was then titrated with



the solution of **8** in 100  $\mu\text{L}$  increments and the concentration of each species measured by  $^1\text{H}$ -NMR. To test reversibility, 4  $\mu\text{L}$   $\text{D}_2\text{O}$  was added to the final solution (bringing the internal  $[\text{D}_2\text{O}]$  to 0.40 M). When  $\text{D}_2\text{O}$  was added, **[4]** and **[8]** increased while **[11]** decreased, serving to reverse the equilibrium. This suggests that  $\text{H}_2\text{O}$  is released in the forward reaction. The data was found to agree well with  $K_{\text{eq}} = \frac{[\mathbf{11}][\text{D}_2\text{O}]}{[\mathbf{4}][\mathbf{8}]} = 95 \pm 10$ .

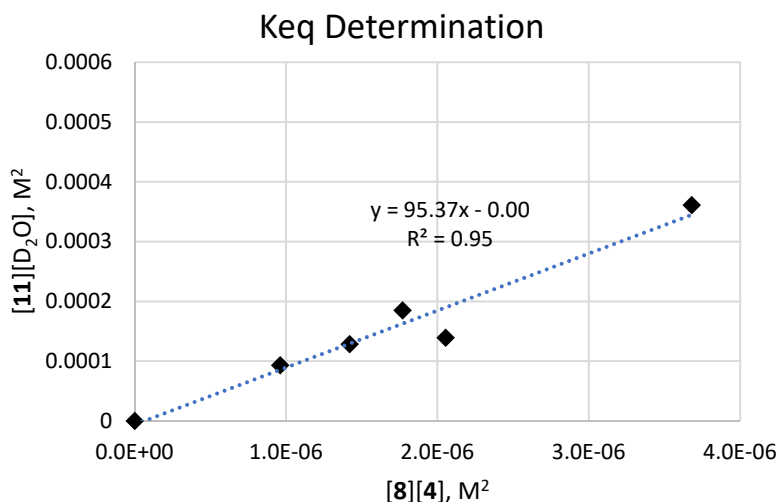

**Figure S9.** Graph showing  $[\mathbf{11}][\text{D}_2\text{O}]$  vs  $[\mathbf{8}][\mathbf{4}]$  used to determine  $K_{\text{eq}}$  between **8** and **4** and the derived proposed dinuclear adduct **11** which forms with loss of water.

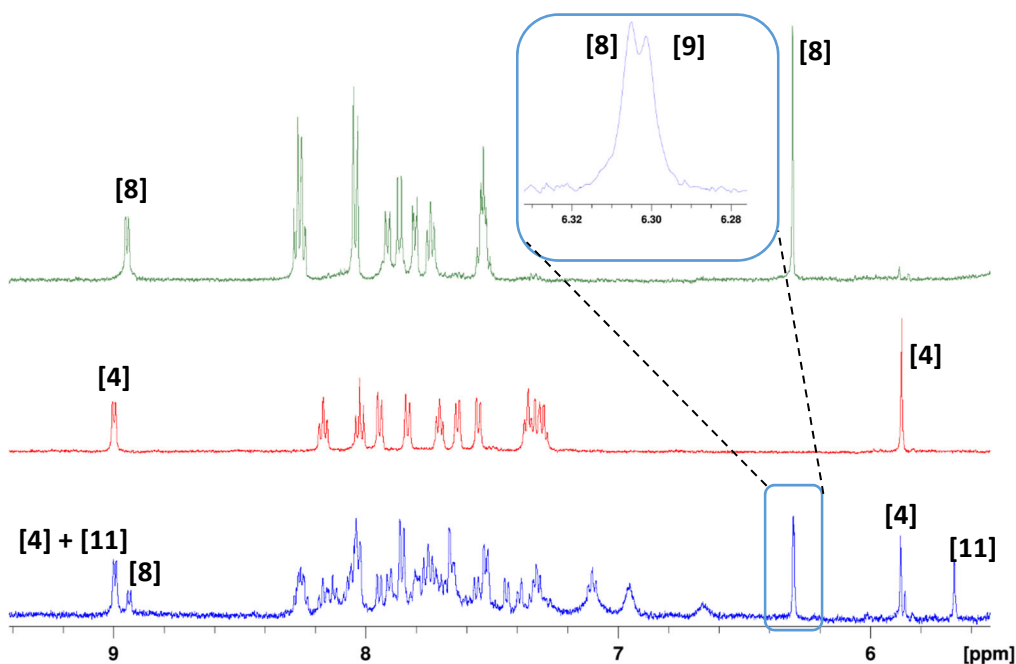

**Figure S10.** Top green trace –  $^1\text{H}$ -NMR spectrum of pure **8** in wet TFE. Middle red trace –  $^1\text{H}$ -NMR spectrum of pure **4** in wet TFE. Bottom blue trace – **8** and **4** combined in wet TFE produces  $^1\text{H}$ -NMR signals for both species as well as the proposed adduct **11**.

## V. Reaction of $\text{LPt}^{\text{II}}(\text{H}_2\text{O})$ , **4**, with $\text{O}_2$ in TFE/Benzene mixture

Under air, **4** (8.8 mg, 16.4  $\mu\text{mol}$ ) was dissolved in 2 mL TFE. After dissolution, the solution was diluted with 1 mL  $\text{C}_6\text{H}_6$ . The solution was then transferred to a 25 mL Schlenk tube and pressurized with 1 atm  $\text{pO}_2$ . Periodically, a 150  $\mu\text{L}$  aliquot was taken and dried under high vacuum for 1 h before dissolving in  $\text{DMSO-d}_6$  to give a yellow solution. The role of  $\text{DMSO-d}_6$  is to convert all  $\text{LPt}(\text{solv})$  species and their derivatives to  $\text{LPt}(\text{DMSO})$ , thereby simplifying  $^1\text{H-NMR}$  analysis. Each  $\text{DMSO-d}_6$  solution was doped with 4  $\mu\text{L}$  of a 0.310 M dioxane solution in  $\text{D}_2\text{O}$  as an internal standard. Thus, the consumption of **4** and appearance of three products, two major and one minor, was followed using the diagnostic singlets in the  $^1\text{H-NMR}$  spectrum belonging to the ligand bridging methylene C-H (Figure S11).

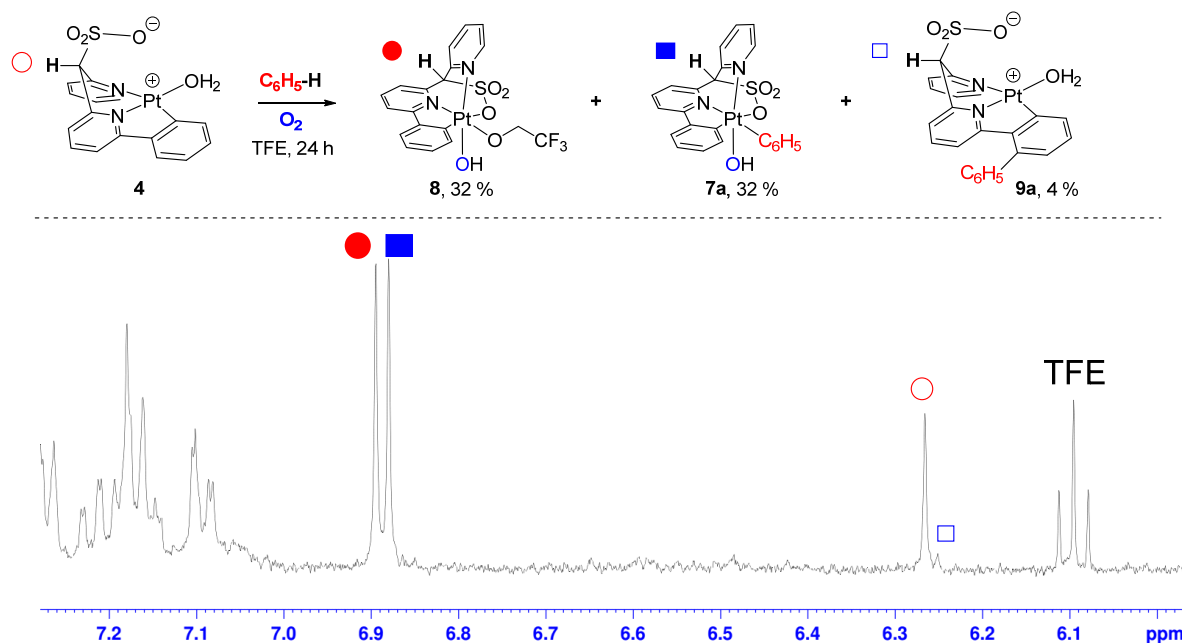

**Figure S11.** Portion of  $^1\text{H-NMR}$  spectrum showing diagnostic bridging C-H singlets, derived from the 24h aliquot of the crude reaction mixture between **4** and  $\text{O}_2$  in a 1:2  $\text{C}_6\text{H}_6$ :TFE mixture, dissolved in  $\text{DMSO-d}_6$ .

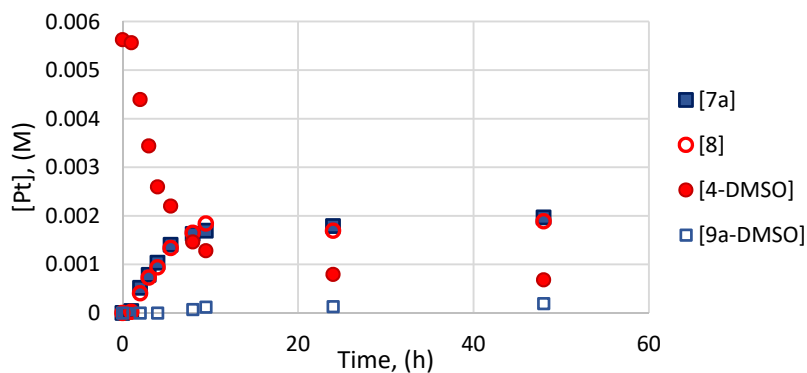

**Figure S12.** Reaction profile showing product and starting material concentration over the course of the reaction between **4** and  $\text{O}_2$  in 1:2  $\text{C}_6\text{H}_6$ :TFE mixture.

The minor product was identified as **9a** by comparison to the  $^1\text{H}$ -NMR spectrum of the same complex, independently synthesized via oxidation of  $\text{Li}[(\text{Ph-dpms})\text{PtPh}]$  in TFE. One of the major products, **8**, was also identified by comparison to the independently synthesized complex (prepared by oxidation of **4** by  $\text{O}_2$  in TFE). The other major product, **7a**, was isolated from the crude reaction mixture by column chromatography (see “General Method A - For the synthesis of  $(\text{C}_6\text{H}_4\text{-dpms})\text{Pt}^{\text{IV}}(\text{Aryl})(\text{OH})$  complexes”, described above). The  $^1\text{H}$ -NMR spectrum of pure **7a** in  $\text{DMSO-d}_6$  matches that in the samples derived from crude reaction mixture. A single crystal of **7a** suitable for XRD analysis was grown by layering a DCM solution with  $\text{Et}_2\text{O}$  and leaving in the freezer overnight.

**a. Attempted reductive elimination from  $(\text{C}_6\text{H}_4\text{-dpms})\text{Pt}^{\text{IV}}(\text{Ph})(\text{OH})$ , **7a****

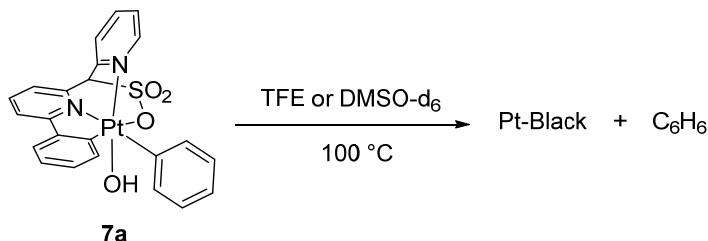

Under air, two solutions containing  $(\text{C}_6\text{H}_4\text{-dpms})\text{Pt}^{\text{IV}}(\text{Ph})(\text{OH})$ , **7a**, (3.0 mg, ) were prepared using 0.6 mL of solvent. In one the solvent was  $\text{DMSO-d}_6$ , in the second the solvent was TFE. Each solution was transferred to a J-Young tube, sealed, and heated at  $90\text{ }^\circ\text{C}$ . In both solutions, periodic  $^1\text{H}$ -NMR analysis revealed the slow release of benzene while each gradually became darker in color due to the accumulation of Pt black. Many new small signals, belonging to the ligand, were observed in the  $^1\text{H}$ -NMR spectrum, however the identification of these decomposition products was not pursued.

**b. Procedure for analysis of kinetics data:**

First, due to the complex nature of the reaction, which includes multiple reaction pathways with respect to the starting material, **4**, at least one of which is reversible, the analysis of reaction kinetics was undertaken with respect to only the  $\text{LPt}^{\text{IV}}$  products (**7a/b** and **8**) which are formed irreversibly. Since in all cases  $[\mathbf{7a/b}] = [\mathbf{8}]$ , the concentration of **7a/b** (which gives rise to just one set of  $^1\text{H}$ -NMR signals in solution) was measured and the concentration of **8** was assumed to be equal to that of **7a/b**.

Second, to find the reaction rate law and determine the observed rate constants  $k_{\text{obs}}$  for the formation of **7a/b**, we used the following methods:

**Method A** (most suitable for determining reaction rate law). Numerical integration of the pseudo-first order kinetic equation,  $d[\mathbf{7a/b}]/dt = k_{\text{obs}}[\mathbf{4}]$ , was utilized using experimental values of **4**, to obtain best non-linear fit of the experimental values of **7a/b** collected, typically, up to 74-85% conversion of **4** (that conversion also accounts for formation of **11**).

**Method B** (most accurate for determining reaction order and  $k_{\text{obs}}$ ). Fitting the **7a/b** in each reaction profile with a third order polynomial and, in some cases, fitting the **4** with a fourth order polynomial (the polynomial orders were chosen by best fit) was followed by using resulting analytic polynomial expressions for **7a/b** and **4** for finding reaction order and  $k_{\text{obs}}$ . An example is shown in Figure S13.

**Method C** (may be good for determining reaction order in a specific reactant). Plotting experimental values of **7a/b** vs. time corresponding to  $\leq 20\%$  conversion of **4** was used to find the initial rates of formation of **7a/b**. The initial rates were then converted to  $k_{\text{obs}}$  by dividing them over  $[\mathbf{4}]_{\text{init}}$  measured at the beginning of the observed reaction period.

In all methods, only the concentrations after the induction period were used in the analyses.

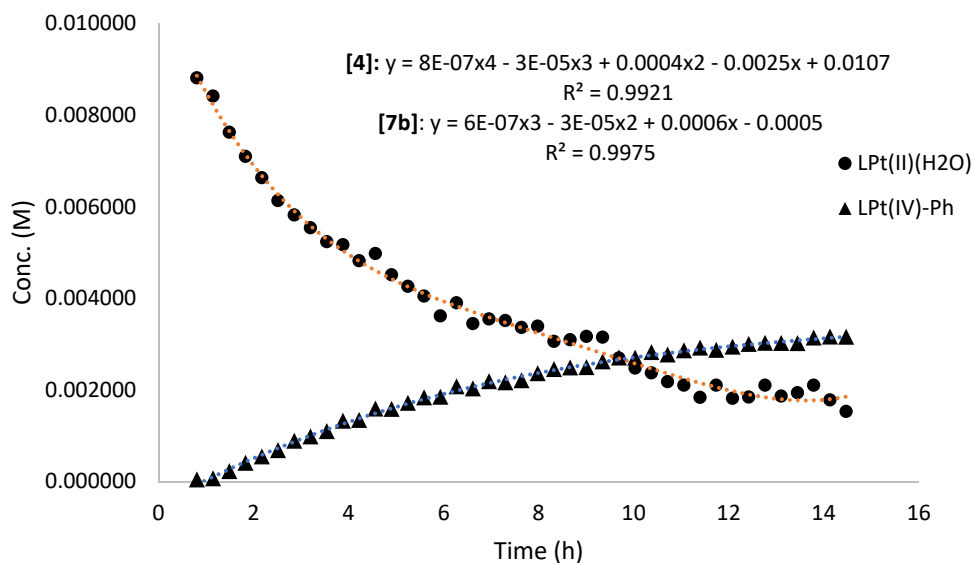

**Figure S13.** Reaction profile derived from monitoring a 1:2  $C_6D_6$ :TFE solution of **4** (10 mM) doped with  $H_2O$  (150 mM) exposed to  $O_2$  (1 atm) by  $^1H$ -NMR along with polynomial fittings.

The derivative of the polynomial fitting for **7a/b** could then be found and, when plotted against time (Figure S14) gives the instantaneous rate,  $d[LPt(IV)-Ph]/dt$ , at each point in time. In this way, the entire data set could be used to make a fair assessment of the initial rate at the time just after the induction period.

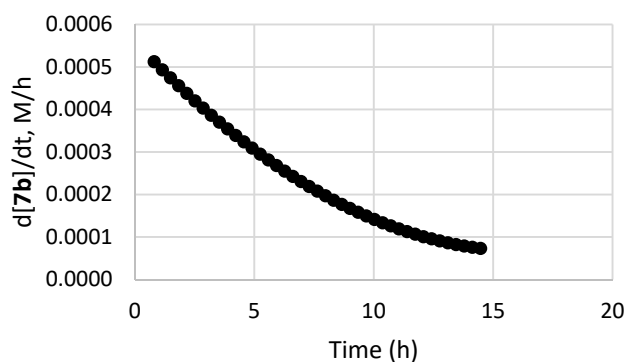

**Figure S14.** The rate of formation of **7b** (derived from third order polynomial regression) plotted against time (derived from fourth order polynomial regression).

Additionally, considering the first order dependence on **4** (Eq. S1), the instantaneous rate,  $d[7a/b]/dt$ , could be plotted against **4** (calculated from the fourth order polynomial regression). A linear fitting then yields the pseudo first order rate constant,  $k_{obs}$ , as the slope (Eq. S2). An example of this analysis is provided in Figure S15. In all cases, the dependence was found to deviate from linear after the first few hours of the reaction. Such an effect may be ascribed to inhibition of the reaction by products. Therefore, only the first linear portion of the data was used to find the  $k_{obs}$ .

Importantly, both approaches (i) and (ii) lead us to the identical conclusions about the order of the formation reaction of **7a/b**, in [benzene], **4** and  $[O_2]$ .

$$\frac{d[7a/b]}{dt} = k[\text{Benzene}][4] = k_{obs}[4] \quad (\text{S1})$$

$$\frac{\frac{d[7a/b]}{dt}}{[4]} = k_{obs} \quad (\text{S2})$$

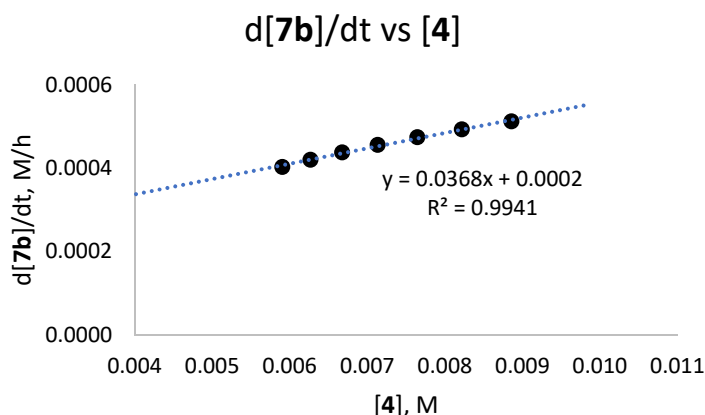

**Figure S15.** Plot of the instantaneous rate of formation of **7b** vs the corresponding instantaneous concentration of **4** gives an initial slope equal to the pseudo first order rate constant  $k_{obs}$ .

### c. Kinetics experiments

General procedure: In an argon filled glovebox, an appropriate amount of LPt(H<sub>2</sub>O) was loaded into a 5 mL vial. Anhydrous degassed TFE was then added and the vial was shaken until all solids had dissolved, resulting in a red solution. A stock TFE solution containing H<sub>2</sub>O was then added to bring the internal [H<sub>2</sub>O] to the desired concentration, resulting color change to yellow-orange. Finally, C<sub>6</sub>D<sub>6</sub> was added, bringing the total volume to 0.6 mL. The solution was transferred to a J Young tube, sealed, and removed from the glovebox and subjected to <sup>1</sup>H-NMR analysis. The tube was then pressurized with O<sub>2</sub> and analyzed by <sup>1</sup>H-NMR every 20 minutes for 12 – 20 h at room temperature (Fig. S6, b).

#### Reaction order in [H<sub>2</sub>O]

Following the general procedure, four solutions were produced, each containing 12.4 mM **4** in 1:2 C<sub>6</sub>D<sub>6</sub>:TFE under 1 atm pO<sub>2</sub> with four different H<sub>2</sub>O concentrations: 12.4, 30.3, 74.1, and 150 mM. After monitoring by <sup>1</sup>H-NMR for 20 h at RT, the reaction profiles were fit according to the **Method B** outlined above and the initial rate, d[**7b**]/dt, was plotted against the internal H<sub>2</sub>O concentration.

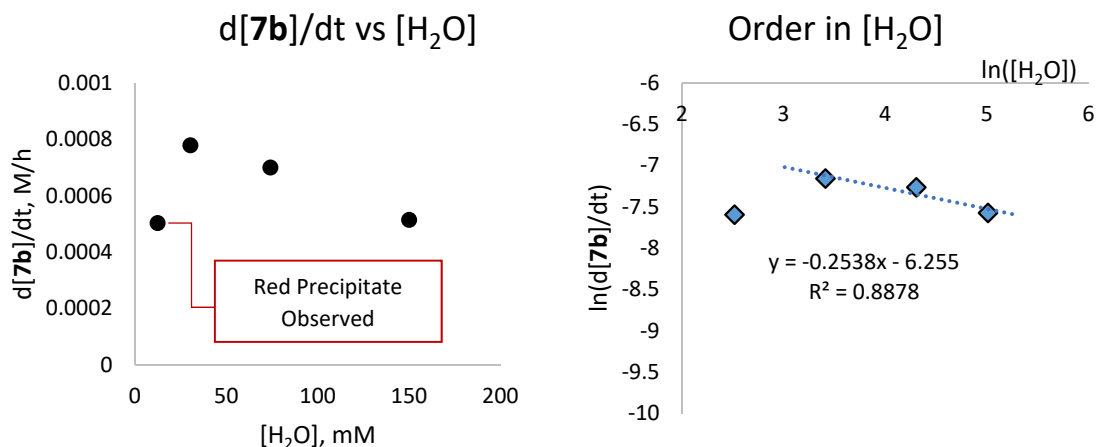

**Figure S16.** Left – Plot of the initial rate  $d[7b]/dt$  vs  $[H_2O]$ . Right – Plot of the natural log of the initial rate  $d[7b]/dt$  vs the natural log of  $[H_2O]$  with the slope corresponding to the order in  $[H_2O]$ . The 4<sup>th</sup> data point associated with the formation of precipitate is excluded.

A red precipitate, previously postulated to be a dinuclear complex derived from the starting material,<sup>2</sup> was observed to form in the reaction which contained only 12.4 mM  $H_2O$  (wherein all the water was derived only from **[4]**) effectively lowering the concentration of **[4]** in solution. This is likely the reason for the anomalously low  $d[7b]/dt$  at this water concentration. Accordingly, this experiment was excluded when analyzing the order in  $[H_2O]$ .

The natural log of each initial rate from the other three reactions was then plotted against the natural log of the corresponding  $H_2O$  concentration. A linear fitting shows a very small negative order in  $[H_2O]$  of  $-0.26 \pm 0.09$ . Thus,  $H_2O$  does serve to inhibit the reaction, but only minimally. An added effect of high, 150 mM,  $H_2O$  concentrations is that  $> 90\%$  of the  $Lp(II)$  species in solution exist as  $Lp(II)(H_2O)$  which exhibits sharp, easily integrated  $^1H$ -NMR signals. Therefore, to simplify analysis, all subsequent experiments were run in the presence of 150 mM  $[H_2O]$ .

### Reaction order in **[4]**

Following the general procedure, four solutions were produced with varying concentrations of **4**: 6.2, 12.4, 18.6, and 24.8 mM. All were doped with  $H_2O$  so that  $[H_2O] = 150$  mM, and the solvent consisted of 1:2  $C_6D_6$ :TFE. After an initial  $^1H$ -NMR spectrum taken under argon, each was pressurized to 1 atm  $pO_2$  and monitored for 12 h at RT. The resulting reaction profiles were analyzed as described below.

**Method A.** The plots demonstrating best fit of experimental **[7b]** using numerical integration of the first-order rate law  $d[7b]/dt = k_{obs}[4]$  are given in Fig. S19. They show good to very good match of experimental vs. calculated concentrations corresponding to the conversion of **4** up to 72-85% and so confirming the reaction 1<sup>st</sup> order in **[4]**.

**Method B.** The analytical  $d[7b]/dt$  calculated for up to  $\sim 30\%$  conversion of **4** was plotted against the corresponding values of  $[4]_0$ . An acceptable quality linear relationship was observed (Fig. S20).

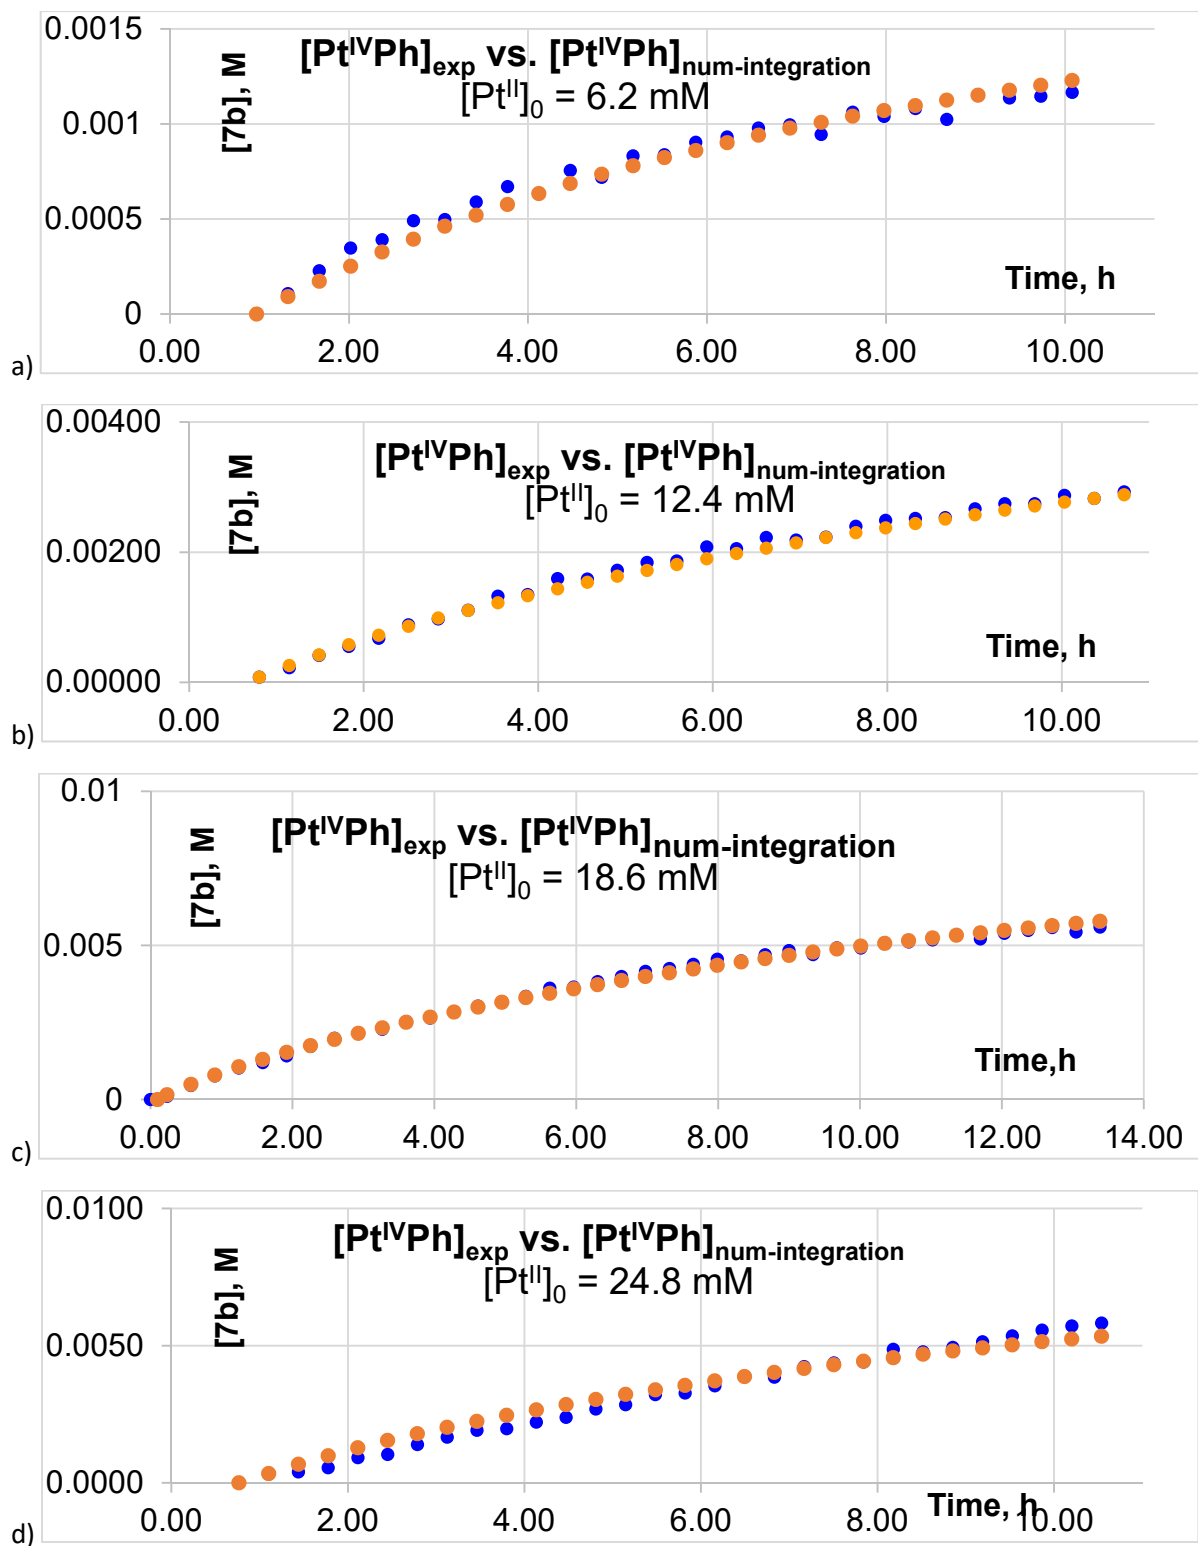

**Figure S19.** Comparison of **[7b]** found by numerical integration of the equation  $d[7b]/dt = k_{obs}[4]$  (orange circles) and experimental (blue circles) values of **[7b]** as a function of reaction time: a)  $[4]_0 = 6.2 \text{ mM}$ , 82% conversion of **4**,  $k_{obs} = 5.7 \times 10^{-2} \text{ h}^{-1}$ ; b)  $[4]_0 = 12.4 \text{ mM}$ , 85% conversion of **4**,  $k_{obs} = 5.2 \times 10^{-2} \text{ h}^{-1}$ ; c)  $[4]_0 = 18.6 \text{ mM}$ , 82% conversion of **4**,  $k_{obs} = 7.9 \times 10^{-2} \text{ h}^{-1}$ ; d)  $[4]_0 = 24.8 \text{ mM}$ , 73% conversion of **4**,  $k_{obs} = 5.4 \times 10^{-2} \text{ h}^{-1}$ . In all cases  $[C_6D_6] = 3.76 \text{ M}$ ;  $21^\circ \text{C}$ .

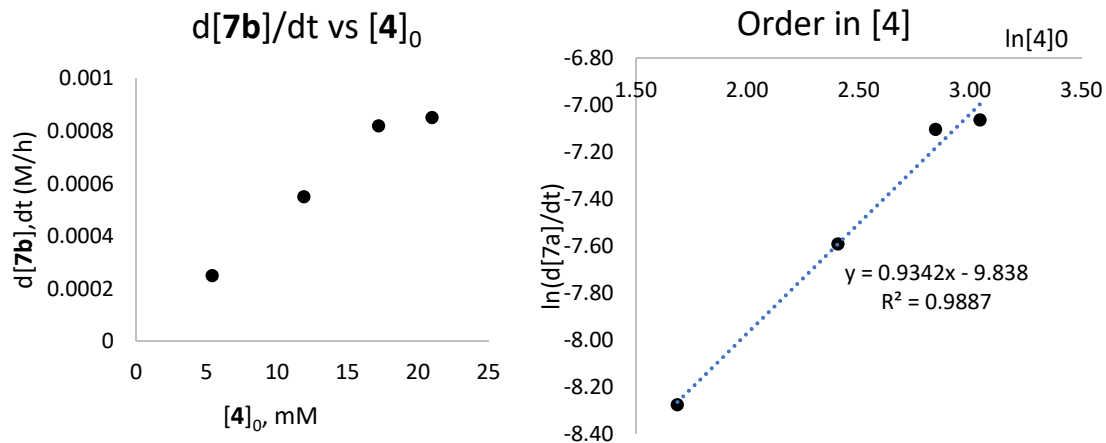

**Figure S20.** Left – The plot of the initial rate  $d[7b]/dt$  against the initial concentration  $[4]_0$ . Right – the natural logarithm of the initial rate  $d[7b]/dt$  plotted against the natural logarithm of the corresponding  $[4]_0$  with the slope equal to the order in  $[4]$ .

A plot of the natural log of initial  $d[7b]/dt$  vs. the natural log of  $[4]_0$  yields a slope of  $\sim 0.9$ , suggesting the rate  $d[7b]/dt$  is first order dependent on the initial  $[4]_0$  in this concentration range. Additional evidence for a first order dependence on  $[4]_0$  is provided by Method A. Subsequent experiments were performed using  $\sim 10$  mM  $[4]_0$ , ensuring a first order dependence on starting material.

### Reaction order in $[O_2]$

Following the general procedure, four solutions were produced, each containing 10 mM  $[4]$  in 1:2  $C_6D_6$ :TFE doped with 150 mM  $H_2O$ . Each J Young tube was pressurized with a different  $pO_2$ : 0.3, 0.5, 1.0, and 2.0 atm. After monitoring by  $^1H$ -NMR for  $\sim 13$  h at RT, the reaction profiles were fit according to the method outlined above and the initial rate,  $d[7b]/dt$ , was plotted against  $pO_2$ . No change in  $d[7b]/dt$  was observed in this range of  $O_2$  pressure (Method B). Accordingly, when the natural log of each derived  $k_{obs}$  is plotted against the natural log of the corresponding  $pO_2$ , a slope of  $0.02 \pm 0.04$  is obtained, suggesting  $0^{th}$  order in  $[O_2]$  (Figure S17).

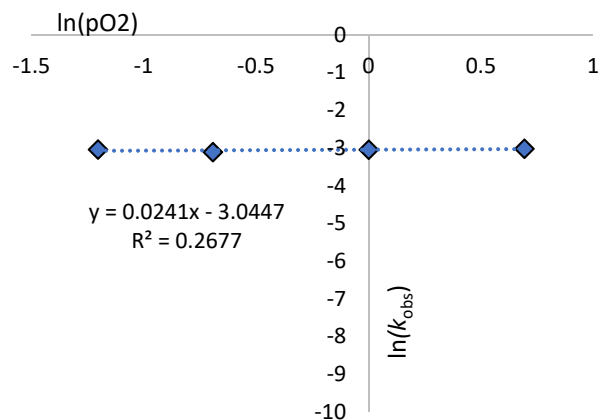

**Figure S17.** Plot of the natural log of the partial pressure of  $O_2$  against the natural log of each  $k_{obs}$  for the reaction between **4** (10 mM) and  $O_2$  in 1:2  $C_6D_6$ :TFE reaction mixture with the slope equal to the order in  $pO_2$ .



### Reaction order in [Benzene]

Following the general procedure, three solutions were produced, each containing ~10 mM **4**, 150 mM [H<sub>2</sub>O], and a varying C<sub>6</sub>D<sub>6</sub>:TFE solvent ratio: 1:2, 1:5, and 1:9 C<sub>6</sub>D<sub>6</sub>:TFE. Each J Young tube was pressurized to 1 atm pO<sub>2</sub> and monitored by <sup>1</sup>H-NMR for ~13 h at RT. The reaction profiles were analyzed according to the methods outlined below.

**Method A.** Sample plots showing the best fit of experimental [**7b**] using numerical integration of the first-order rate law  $d[\mathbf{7b}]/dt = k_{\text{obs}}[\mathbf{4}]$  are given in Fig. S22. The plots show very good match of experimental vs. calculated data up to the conversion of **4** of 67-77% observed by 12-13h of reaction, so suggesting that the reaction is 1<sup>st</sup> order in [C<sub>6</sub>D<sub>6</sub>].

**Method B.** The rate of product formation varied linearly with increasing [C<sub>6</sub>D<sub>6</sub>]. A plot of the natural log of  $k_{\text{obs}}$  versus the natural log of each corresponding [C<sub>6</sub>D<sub>6</sub>] yields a slope of ~1 (Figure S18, a), suggesting a first order dependence on [C<sub>6</sub>D<sub>6</sub>].

**Method C.** The graphs used for calculation of initial rates of formation of **7b** are given in Fig. S24. The logarithm of the calculated  $k_{\text{obs}}$  vs. log[C<sub>6</sub>D<sub>6</sub>] yields a slope of ~1 (Figure S18, b), suggesting a first order dependence on [C<sub>6</sub>D<sub>6</sub>].

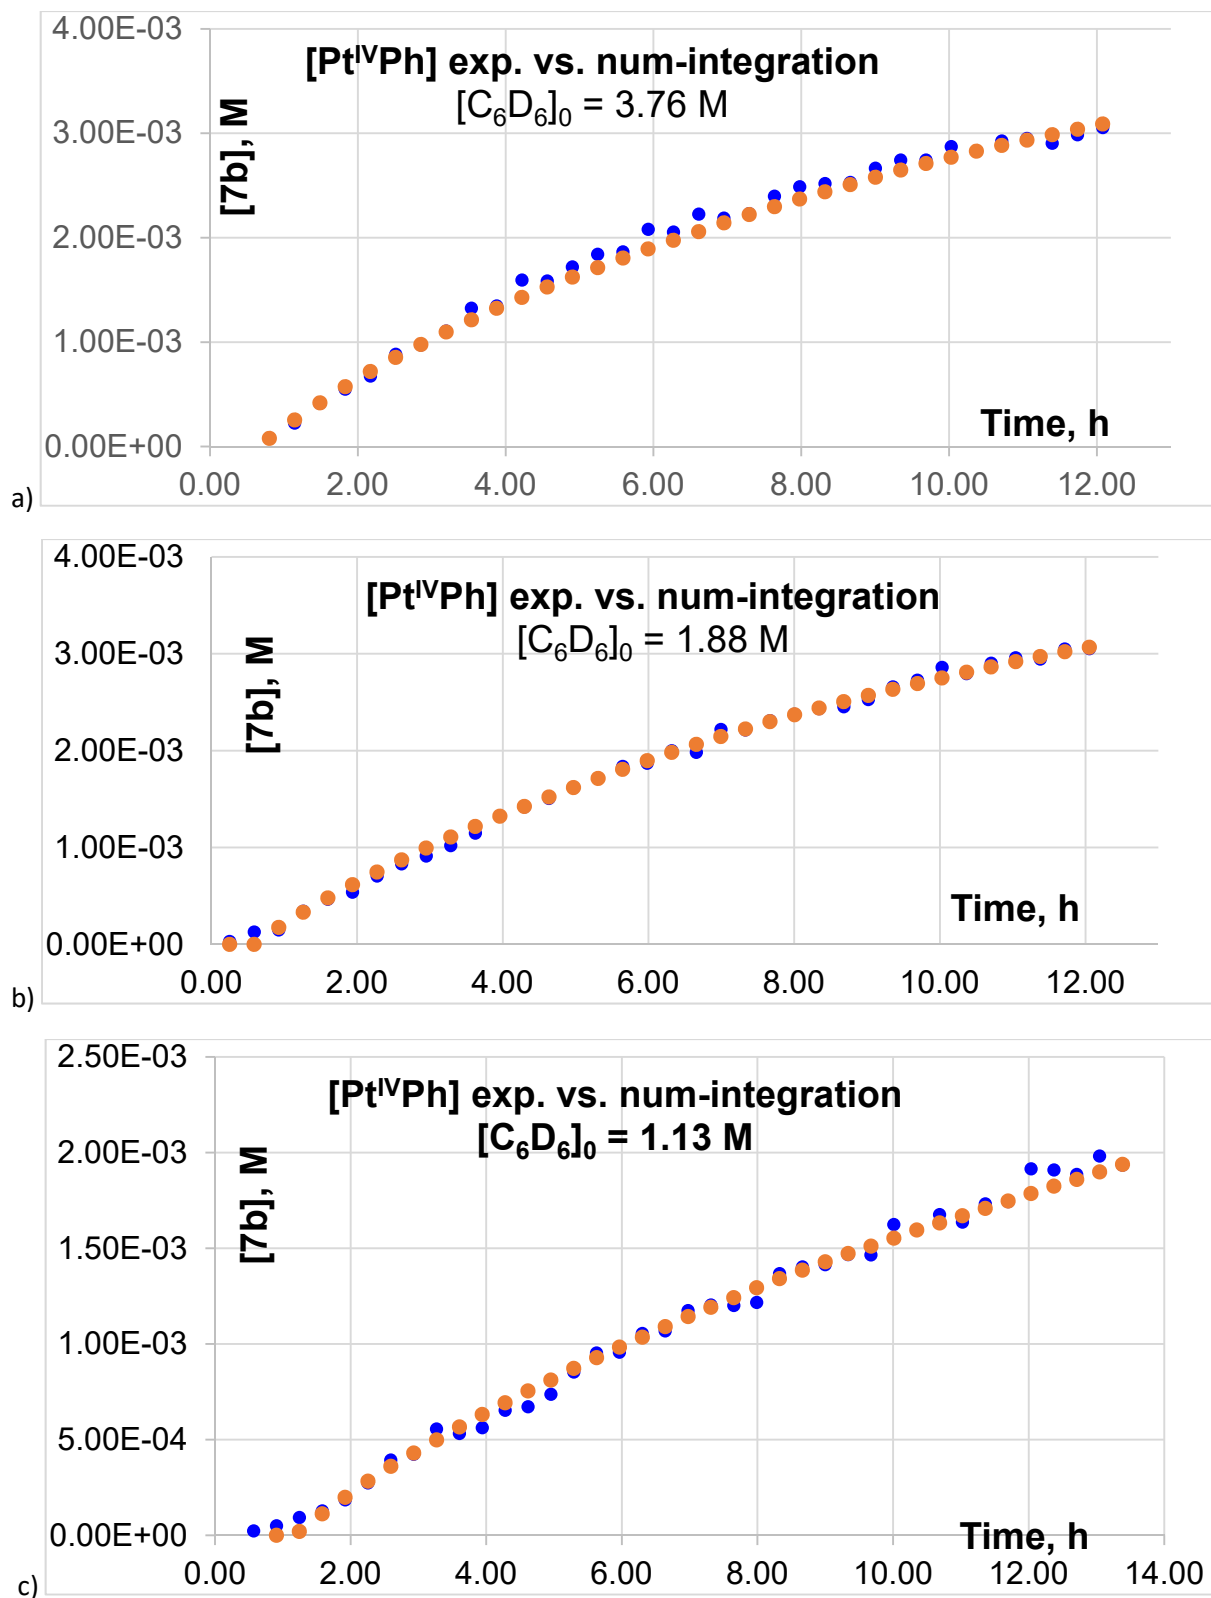

**Figure S22.** Comparison of experimental **[7b]** (blue circles) and **[7b]** produced using numerical integration of the equation  $d[7b]/dt = k_{\text{obs}}[4]$  (orange circles), as a function of reaction time: a)  $[C_6D_6]_0 = 3.76 \text{ M}$ , conversion of **4** 75%,  $k_{\text{obs}} = 5.4 \times 10^{-2} \text{ h}^{-1}$ ; b)  $[C_6D_6]_0 = 1.88 \text{ M}$ , conversion of **4** 77%,  $k_{\text{obs}} = 6.2 \times 10^{-2} \text{ h}^{-1}$ ; c)  $[C_6D_6]_0 = 1.13 \text{ M}$ , conversion of **4** 67%,  $k_{\text{obs}} = 3.2 \times 10^{-2} \text{ h}^{-1}$ .

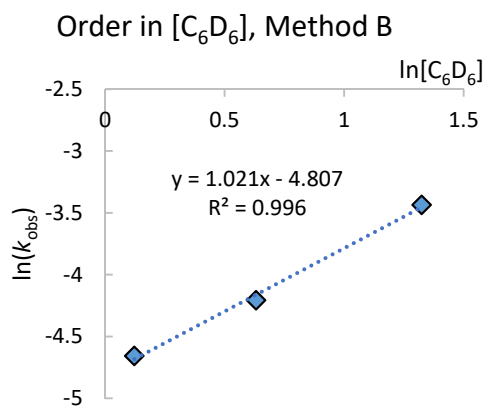

a)

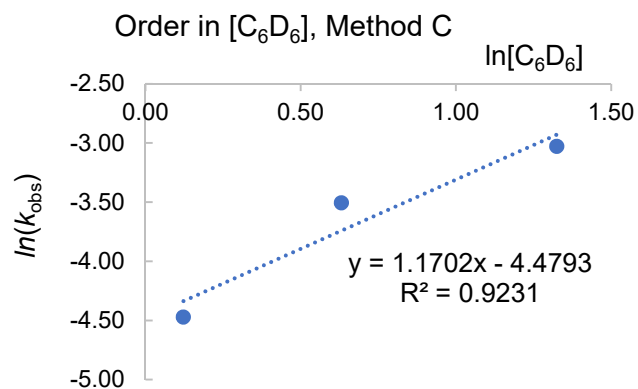

b)

**Figure S18.** Plot of the natural log of the  $k_{obs}$  from the reaction between **4** (10 mM) and  $O_2$  in  $C_6D_6$ :TFE mixture of different ratios and the natural log of each corresponding  $[C_6D_6]$  with the slope equal to the order in  $[C_6D_6]$ : a)  $k_{obs}$  produced using Method B; b)  $k_{obs}$  produced using Method C.

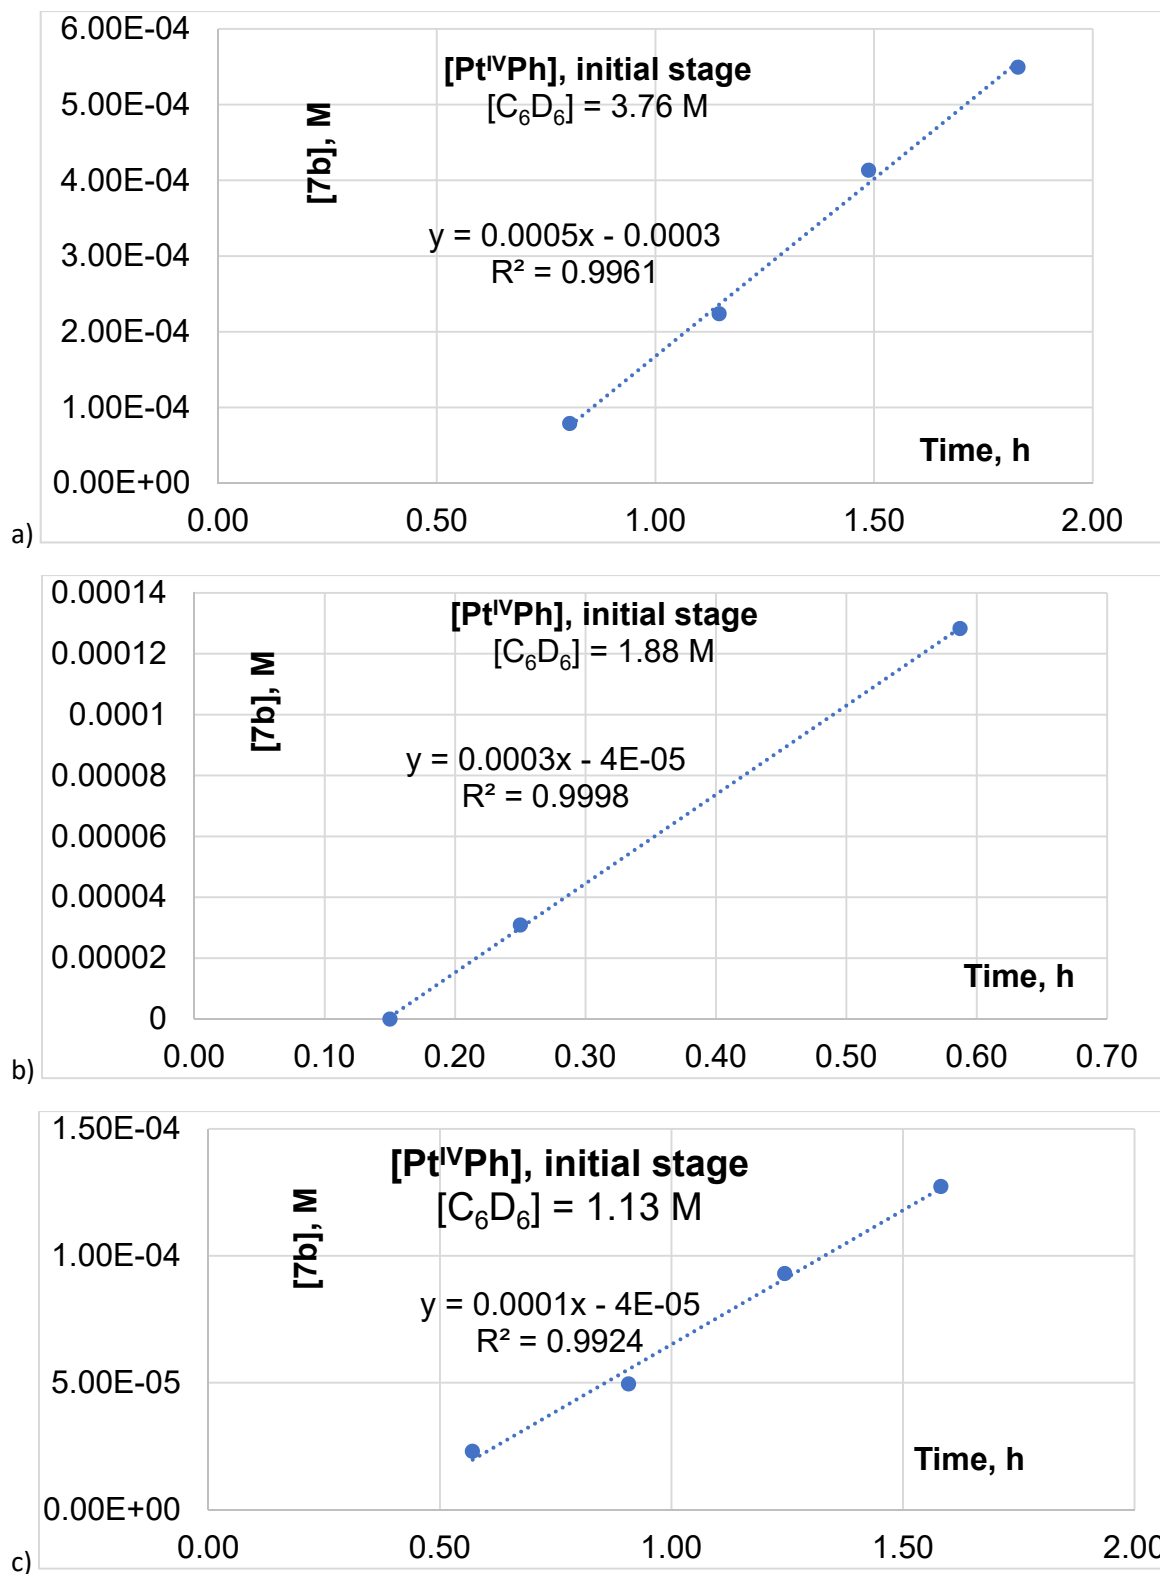

**Figure S24.** Plots of the experimental values of **[7b]** vs. time corresponding to  $\leq 20\%$  conversion of  $C_6D_6$  and  $\sim 10$  mM **4** under  $O_2$  atmosphere during the initial post-induction reaction period: a)  $[4]_{init} = 9.7$  mM,  $[C_6D_6] = 3.76$  M,  $k_{obs} = 4.8 \times 10^{-2} h^{-1}$ ,  $k_2 = 3.6 \times 10^{-6} M^{-1} s^{-1}$ ; b)  $[4]_{init} = 9.7$  mM,  $[C_6D_6] = 1.88$  M,  $k_{obs} = 3.0 \times 10^{-2} h^{-1}$ ,  $k_2 = 4.4 \times 10^{-6} M^{-1} s^{-1}$ ; c)  $[4]_{init} = 9.3$  mM,  $[C_6D_6] = 1.13$  M,  $k_{obs} = 1.14 \times 10^{-2} h^{-1}$ ,  $k_2 = 2.8 \times 10^{-6} M^{-1} s^{-1}$ .

## Reaction Hydrogen Deuterium Kinetic Isotope Effect (KIE)

Following the general procedure, two sets of solutions were produced. The first set contained **[4]** (10 mM) in  $[H_2O]$  (150 mM) in 1:2  $C_6D_6$ :TFE. The second set consisted of the same concentrations of each reactant except that  $C_6H_6$  was substituted for  $C_6D_6$ . The solutions were transferred to NMR J-Young tubes and, after an initial analysis by  $^1H$ -NMR, were pressurized to 1 atm  $pO_2$  and monitored by  $^1H$ -NMR at RT for 13 h. The data was analyzed as described in the “Procedure for Analysis of Kinetics Data” section and the pseudo first order rate constant  $k_{obs}$  for each reaction was found. Finally, each pseudo-first order rate constant  $k_{obs}$  was converted to the second order rate constant  $k$  (see Eq. S2) by dividing by  $[Benzene]$ .

To see if there is any H/D KIE due to solvent, a third experiment was run wherein TFE was replaced by TFE- $d_1$ . The  $k$  was found to be identical to when protic TFE is used.

**Table S2.** Pseudo first order rate constants,  $k_{obs}$ , and derived second order rate constants,  $k$ , derived from the reaction between **4** and  $O_2$  in 1:2 Benzene:TFE solvent mixtures showing a KIE of  $1.6 \pm 0.1$  between protic and per-deuterio benzene.

| Solvent Mixture          | $k_{obs}$ , ( $h^{-1}$ ) | $k$ , ( $M^{-1} \cdot h^{-1}$ ) | KIE                             |
|--------------------------|--------------------------|---------------------------------|---------------------------------|
| 1:2 $C_6D_6$ :TFE        | $0.041 \pm 0.003$        | $0.0110 \pm 0.0008$             | <b><math>1.6 \pm 0.1</math></b> |
| 1:2 $C_6H_6$ :TFE        | $0.064 \pm 0.001$        | $0.0170 \pm 0.0002$             |                                 |
| 1:2 $C_6D_6$ :TFE- $d_1$ | $0.043 \pm 0.001$        | $0.0110 \pm 0.0003$             |                                 |

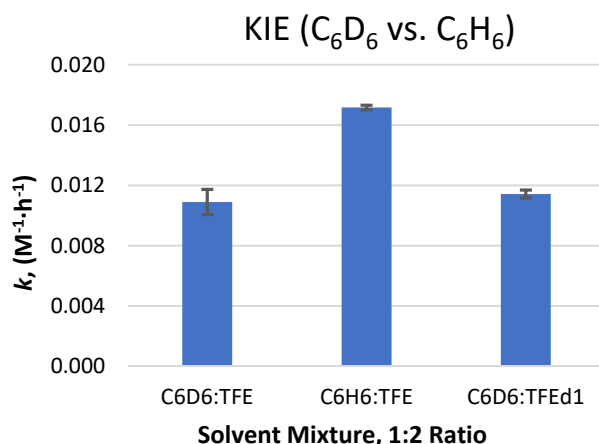

**Figure S19.** Second order rate constants,  $k$ , derived from the reaction between **4** and  $O_2$  in 1:2 Benzene:TFE solvent mixtures.

### d. Effect of doping with products and other additives

#### Doped with both **[7a]** and **[8]**:

Following the general procedure, a solution of **[4]** (10 mM) in 1:2  $C_6D_6$ :TFE doped with  $[H_2O]$  (150 mM), **[7b]** (6 mM, 0.6 eq), and **[8]** (6 mM, 0.6 eq) was prepared. Accordingly, much of the **[8]** and **[4]** were in the form of **[11]** at the beginning of the reaction (Figure S20).

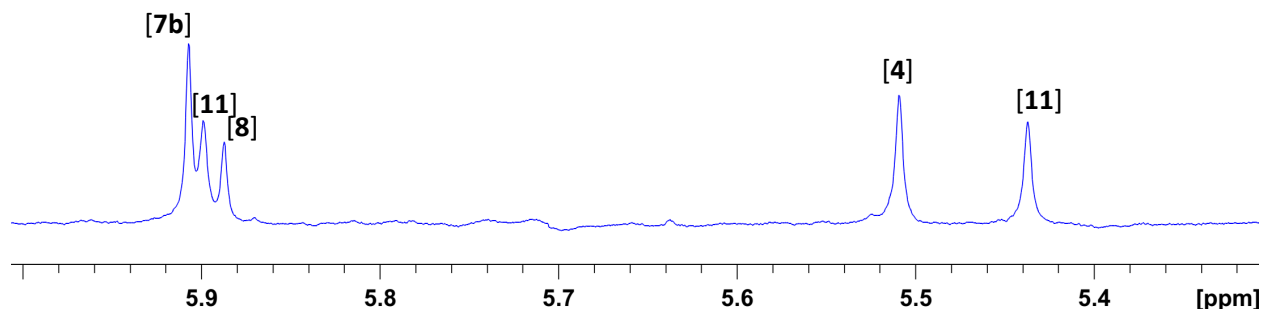

**Figure S20.** Portion of  $^1\text{H}$ -NMR spectrum showing diagnostic bridging C-H singlets taken before addition of  $\text{O}_2$  to reaction between **4** and  $\text{O}_2$  in 1:2  $\text{C}_6\text{D}_6$ :TFE in the presence of 0.6 eq. each of **8** and **7b** with the dinuclear adduct **11** also visible.

The solution was transferred to an NMR J-Young tube and, after initial  $^1\text{H}$ -NMR analysis, was pressurized with  $\text{O}_2$  (1 atm) and monitored for 13 h at RT by  $^1\text{H}$ -NMR. Here the total  $[\text{Pt(IV)}]$  was measured due to the overlap of multiple signals, where  $[\text{Pt(IV)}]_{\text{total}} = [\text{7b}] + [\text{8}] + [\text{11}]$ . The rate of formation of Pt(IV) products was found to be much inhibited in the reaction doped with a large initial concentration of **8** and **7b** as compared to the normal reaction conditions (Fig. S27).

#### Effect of Product Doping: 0.6 eq. of **7b** and **8**

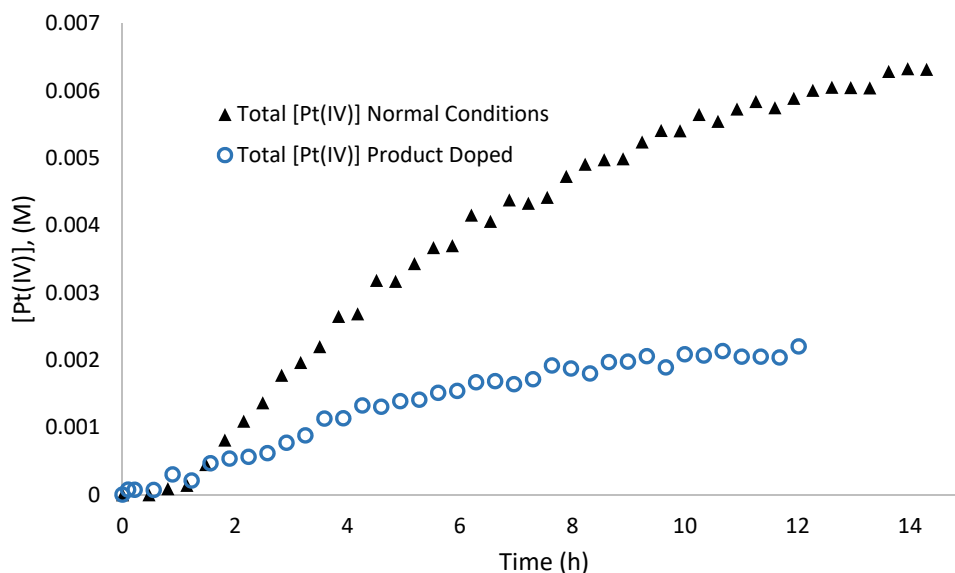

**Figure S21.** Change in  $[\text{Pt(IV)}]$  over time (measured as **8** + **7b** + **11**) under normal reaction conditions (black triangles) and doped with 0.6 eq. each of **8** and **7b** (blue open circles). Normal conditions: **4** (10 mM),  $\text{H}_2\text{O}$  (150 mM),  $\text{O}_2$  (1 atm), in 1:2  $\text{C}_6\text{D}_6$ :TFE.

#### Doped with just [7b]:

To see if the inhibition is due to the presence of [7b] or [8] (or both), a similar solution was prepared containing [4] (10 mM) in 1:2 C<sub>6</sub>D<sub>6</sub>:TFE doped with [H<sub>2</sub>O] (150 mM) and [7b] (4 mM, 0.4 eq). No [8] was added to the solution. After transferring to a J-Young tube and an initial <sup>1</sup>H-NMR spectrum was acquired, the tube was pressurized with 1 atm pO<sub>2</sub> and analyzed periodically by <sup>1</sup>H-NMR for 13 h at RT. The rate of accumulation of [Pt(IV)] was unaffected by the initial concentration of 7b as compared to the normal reaction conditions (Figure S22). More so, the rate of product formation showed no induction period, whereas the normal reaction conditions result in an induction period of ~1 h.

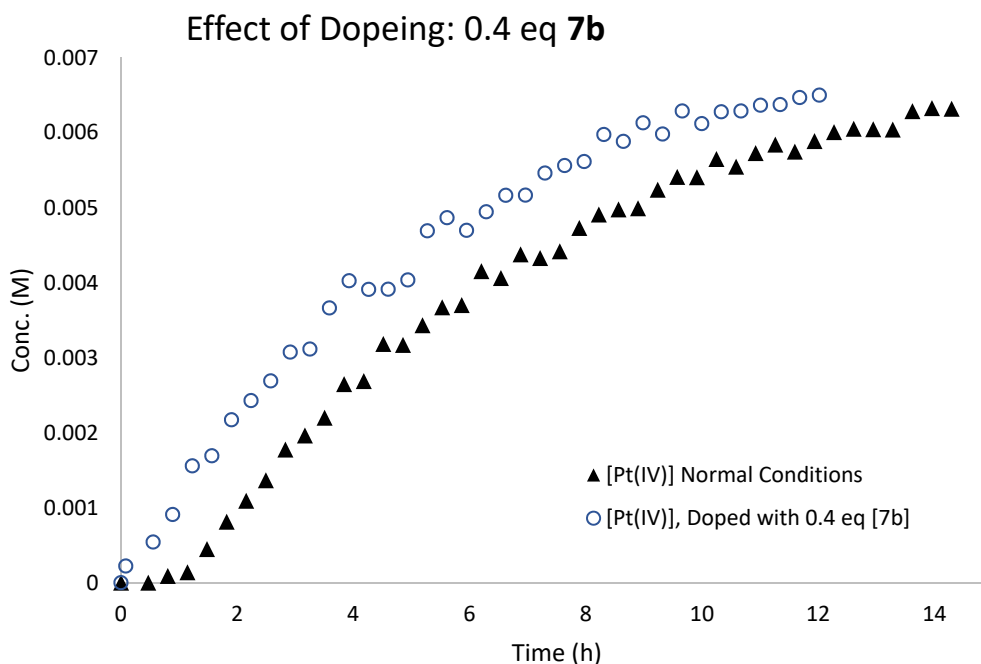

**Figure S22.** Change in [Pt(IV)] over time (measured as [8] + [7b] + [11]) under normal reaction conditions (black triangles) and doped with 0.4 eq [7b] (blue open circles). Normal conditions: **4** (10 mM), H<sub>2</sub>O (150 mM), O<sub>2</sub> (1 atm), in 1:2 C<sub>6</sub>D<sub>6</sub>:TFE.

#### Doped with just [8]:

To see if the initial presence of small amounts of [8] may also eliminate the induction period, a similar solution was prepared containing [4] (10 mM) in a 1:2 C<sub>6</sub>D<sub>6</sub>:TFE mixture doped with [H<sub>2</sub>O] (150 mM) and [8] (1 mM, 0.1 eq.). The solution was transferred to a J-Young tube and, after initial analysis by NMR, the tube was pressurized with O<sub>2</sub> (1 atm) and monitored for 13 h at RT by <sup>1</sup>H-NMR. No induction period was observed while a slight inhibition was observed (Figure S23, S6c), as expected by the observed interaction between [8] and [4]. The inhibition was very much pronounced with 0.6 eq. **8** added in the beginning (Fig. S6, d).

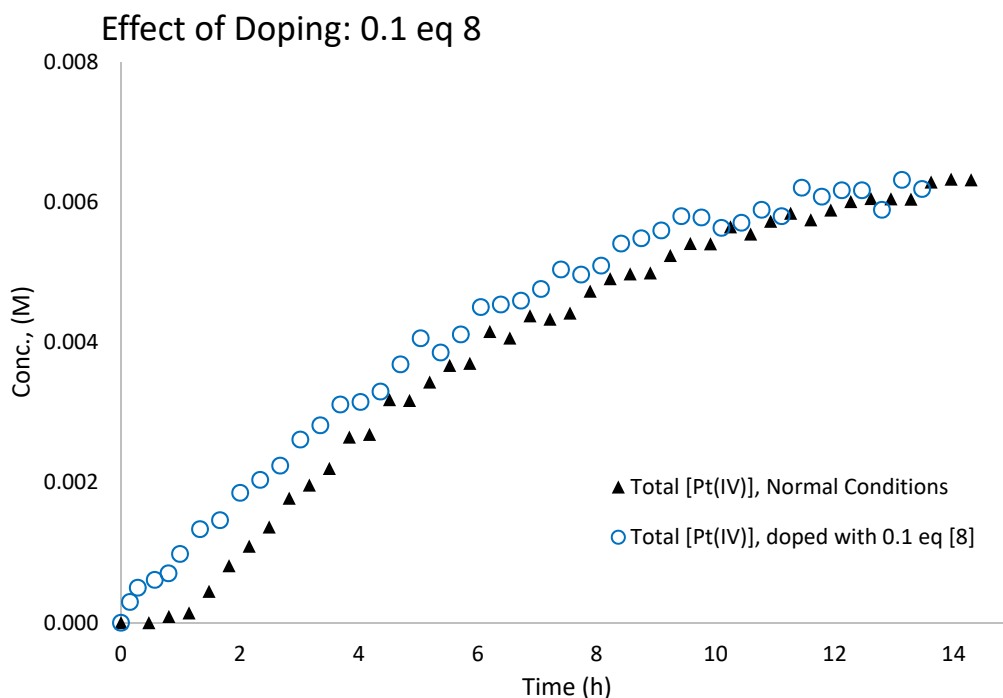

**Figure S23.** Change in [Pt(IV)] over time (measured as [8] + [7b] + [11]) under normal reaction conditions (black triangles) and doped with 0.1 eq [8] (blue open circles). Normal conditions: **4** (10 mM), H<sub>2</sub>O (150 mM), O<sub>2</sub> (1 atm), in 1:2 C<sub>6</sub>D<sub>6</sub>:TFE.

#### Doped with BHT:

Two solutions were prepared using **4** (4.2 mg, 7.8  $\mu$ mol) along with 0.7 or 10 eq. butylated hydroxy toluene (1.2 mg or 17 mg) dissolved in 0.5 mL TFE. The orange-yellow solution was then diluted with 0.25 mL C<sub>6</sub>D<sub>6</sub>, transferred to a J-Young tube, and analyzed by <sup>1</sup>H-NMR. After the initial spectrum was taken, the tube was pressurized with 1 atm O<sub>2</sub> and then monitored periodically by NMR. In both cases there was no noticeable effect on rate or selectivity and the yield of **7a** after 24 h was 32 %.

#### Doped with Hydroquinone:

In an argon filled glovebox, **4** (4.0 mg, 7.4  $\mu$ mol) was dissolved in anhydrous TFE (0.5 mL) along with hydroquinone (~0.5 mg, ~5  $\mu$ mol, ~0.6 eq). The solution was diluted with 0.25 mL C<sub>6</sub>D<sub>6</sub> and transferred to a J-Young NMR tube. An initial <sup>1</sup>H-NMR spectrum revealed that hydroquinone was present in 5.3 mM, 0.6 eq. as compared to the total (L)Pt<sup>II</sup> species present (8.5 mM). The tube was pressurized with O<sub>2</sub> (1 atm) and monitored periodically by <sup>1</sup>H-NMR. The color remained a yellow-orange, never changing to red, while the production of Pt(IV) products was severely hindered with only a 5.5% yield of **7a** after 96 h. At the 96 h mark, the temperature was increased to 55 °C for 19 h before the next spectrum was taken, which showed an increase in the yield of **7a** to 11 %. Remarkably, the selectivity for **7a** was greatly increased in the presence of hydroquinone, maintaining a roughly 4:1 ratio of **7a**:**8** throughout the reaction. At the end of the experiment, the amount of benzoquinone was measured to be approximately 1 mM. Finally, the solvent was removed under vacuum, and the residue dissolved in DMSO-d<sub>6</sub> which confirmed the 4:1 ratio of **7a** to **8**.



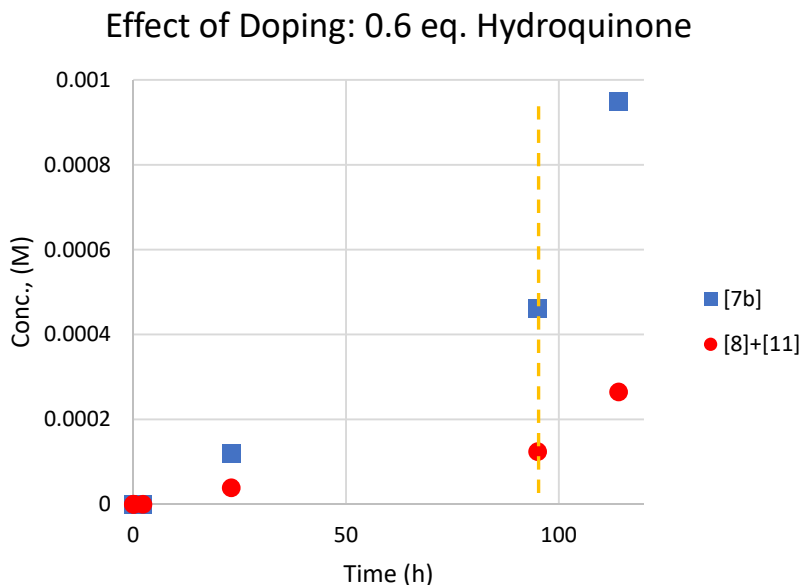

**Figure S30.** Accumulation of Pt(IV) products in reaction between **4** (8.5 mM) and O<sub>2</sub> (1 atm) in 1:2 C<sub>6</sub>D<sub>6</sub>:TFE in the presence of 0.6 eq hydroquinone with the orange dotted line representing a change of temperature from RT to 55 °C.

#### Hydroquinone control experiment

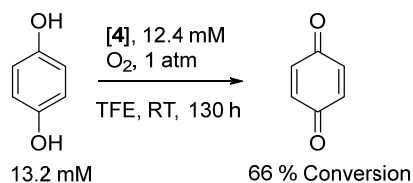

In an argon filled glove box, **4** (4.0 mg, 7.4  $\mu\text{mol}$ ) was added to a vial along with anhydrous TFE (0.6 mL). The vial was capped and gently agitated until all had dissolved, giving a red solution. In a separate vial, hydroquinone (0.9 mg, 8  $\mu\text{mol}$ ) was weighed out. The red TFE solution of **4** was then transferred to the vial containing hydroquinone. After swirling for 20 min, the hydroquinone had only partially dissolved. The entire mixture was carefully transferred to a J. Young tube and removed from the glovebox. An initial spectrum showed the internal concentration of **4** to be 12.4 mM and hydroquinone to be 12.5 mM. The tube was then pressurized with 1 atm pO<sub>2</sub> and monitored periodically by <sup>1</sup>H-NMR. It was observed that after 24 h, all the hydroquinone had dissolved (giving a final concentration of 13.2 mM).

In pure TFE, the singlets belonging to hydroquinone and benzoquinone produce just one signal at 6.76 ppm, preventing their separate integration. To deconvolute the signals, after 133 h reaction time, the reaction mixture was diluted with C<sub>6</sub>D<sub>6</sub> such that the final solvent ratio was 1:2 C<sub>6</sub>D<sub>6</sub>:TFE. In this solvent mixture, benzoquinone appears as a singlet at  $\delta$  = 6.53 ppm and hydroquinone gives a singlet at  $\delta$  = 6.91 ppm. The concentration of benzoquinone at t = 133 h was thus measured to be 8.7 mM (**66 % yield**).

A 200  $\mu\text{L}$  aliquot of the reaction mixture was taken and the solvent removed *in vacuo* leaving a reddish residue which was redissolved in DMSO-*d*<sub>6</sub>. Subsequent <sup>1</sup>H-NMR analysis showed that **4** was the only Pt complex in solution (none of the oxidized form, **8**, had formed).

#### Doped with trifluoroacetic acid:

Due to the signal broadening observed in the  $^1\text{H}$ -NMR spectra of TFE solutions of **[4]** containing trifluoroacetic acid (TFA), the effect of TFA was assessed by removing aliquots from a reaction, removing solvent, and re-dissolving in  $\text{DMSO-d}_6$ . **[4]** (4.3 mg, 8.0  $\mu\text{mol}$ ) was dissolved in 1 mL TFE. The solution was then diluted with 0.5 mL  $\text{C}_6\text{H}_6$ . To the solution was then added 8.0  $\mu\text{L}$  of a 0.34 M stock solution of TFA in TFE (2.7  $\mu\text{mol}$ ,  $\sim 0.3$  eq) which was accompanied by a color change to bright red. The solution was transferred to a 25 mL Schlenk tube and the headspace flushed with  $\text{O}_2$ . 100  $\mu\text{L}$  aliquots were removed periodically, the solvent removed, and the reddish yellow residue dissolved in  $\text{DMSO-d}_6$  and doped with 4.0  $\mu\text{L}$  of a 0.310 M dioxane solution in  $\text{D}_2\text{O}$  as an internal standard.

The reaction was monitored in this way for 24 hours, during which time no changes occurred in the color of the reaction mixture or in the  $^1\text{H}$ -NMR spectra of the collected aliquots. After 6 days however, the color had changed to yellow. An aliquot was removed which showed nearly all **[4]** had been consumed and the yield of **[7a]** had climbed to 46 %. Surprisingly no **[8]** was detected in solution. Instead  $\sim 9$  to 10 other unidentified minor products were present, likely resulting from the decomposition of **[8]** in the presence of TFA.

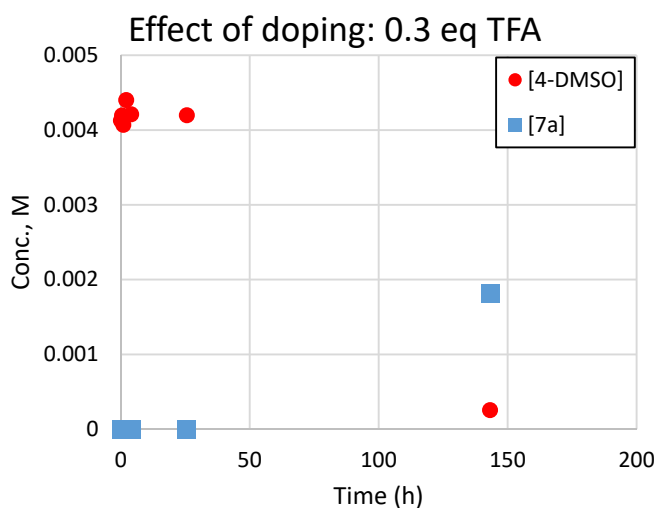

**Figure S31.** Consumption of **4** (measured as **4**-DMSO in aliquots dissolved in  $\text{DMSO-d}_6$  solutions) and the appearance of **7a** upon exposure of a 1:2  $\text{C}_6\text{H}_6$ :TFE solution of **4** (4.4 mM) to  $\text{O}_2$  (1 atm) at RT in the presence of 0.3 eq trifluoroacetic acid.

## VI. Kinetics of $\text{Li}[(\text{C}_6\text{H}_4\text{-dpms})\text{PtPh}]$ , $\text{Li}(\mathbf{12a})$ , oxidation by $\text{O}_2$

In an argon filled glovebox,  $\text{Li}(\mathbf{12a})$  (3.0 mg) was dissolved in TFE (0.6 mL) to make an 8.3 mM yellow solution. The solution was then doped with 6.2 mM MeCN as an internal standard and transferred to a sealable NMR J-Young tube. After initial analysis by  $^1\text{H}$ -NMR the, tube was pressurized with 1 atm  $\text{pO}_2$  and  $[\text{Li}(\mathbf{12a})]$  was tracked via the diagnostic bridging methine C-H singlet. While  $\text{Li}(\mathbf{13a})$  was the primary product, the reaction was not as clean as when MeCN is not present, possibly due to inhibition of the subsequent reductive elimination and cycloplatination reactions by MeCN. The linear correlation between  $\ln([\text{Li}(\mathbf{12a})])$  and time suggests a first order reaction and gives a  $t_{1/2}$  of  $2.0 \pm 0.3$  h.

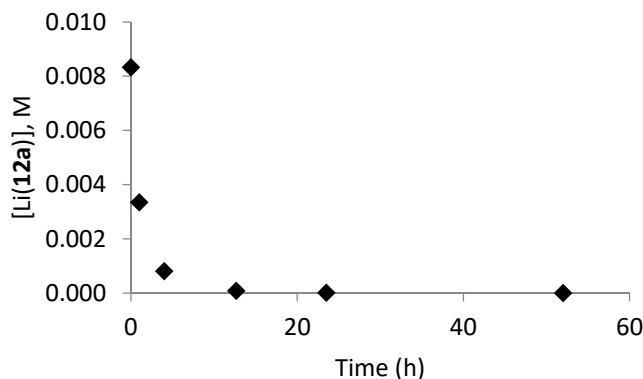

**Figure S32.** Reaction profile showing the conc. of  $\text{Li}(\mathbf{12a})$  upon exposure to a TFE solution of  $\text{Li}(\mathbf{12a})$  (3.0 mM) to  $\text{O}_2$  (1 atm) at RT.

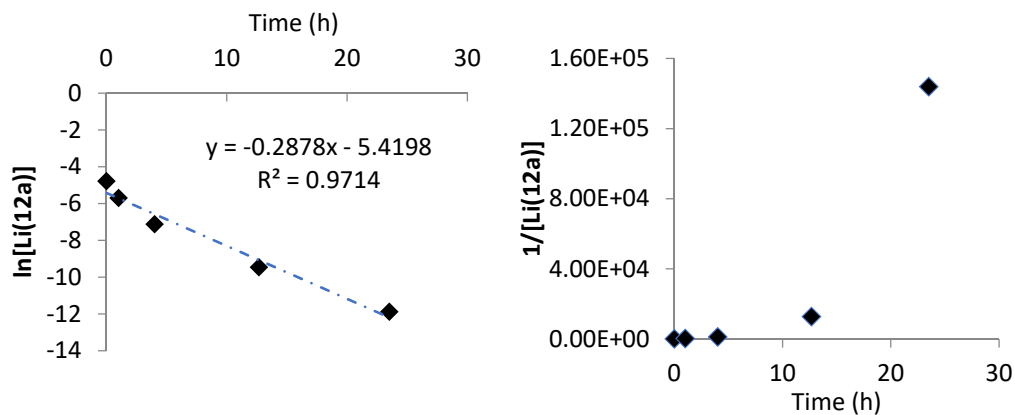

**Figure S24.** Left – first order fitting of the data in Figure S32. Right – attempted second order fitting of the data in Figure S32.

## VII. Crystallographic Details

Crystal Structure Determination for **7a** (Figure S25).

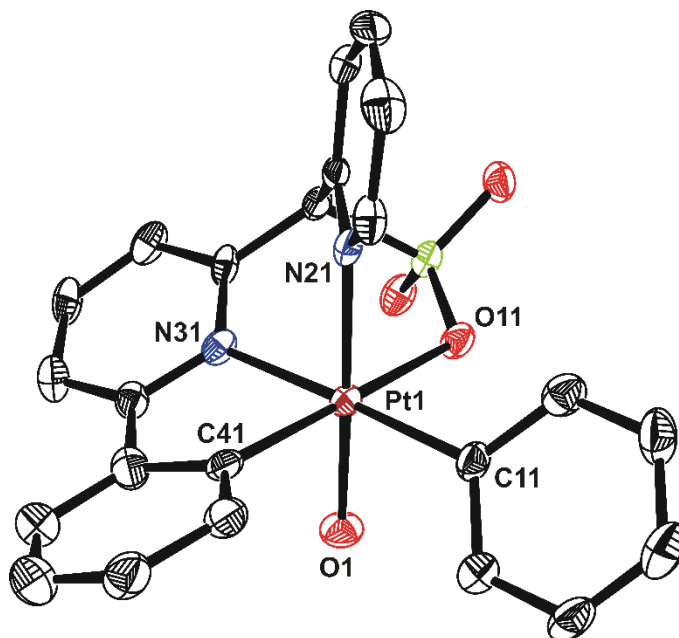

**Figure S25.** ORTEP plot for **7a**.

A colorless plate-like specimen of  $\text{C}_{25}\text{H}_{22}\text{Cl}_4\text{N}_2\text{O}_4\text{PtS}$ , approximate dimensions  $0.03 \text{ mm} \times 0.13 \text{ mm} \times 0.19 \text{ mm}$ , was used for the X-ray crystallographic analysis. The X-ray intensity data were measured on a Bruker APEX-II CCD system equipped with a graphite monochromator and a MoK $\alpha$  sealed tube ( $\lambda = 0.71073 \text{ \AA}$ ). Data collection temperature was 150 K.

The total exposure time was 25.25 hours. The frames were integrated with the Bruker SAINT software package using a narrow-frame algorithm. The integration of the data using a triclinic unit cell yielded a total of 34997 reflections to a maximum  $\theta$  angle of  $26.50^\circ$  ( $0.80 \text{ \AA}$  resolution), of which 11312 were independent (average redundancy 3.094, completeness = 99.9%,  $R_{\text{int}} = 4.33\%$ ) and 9327 (82.45%) were greater than  $2\sigma(F^2)$ . The final cell constants of  $a = 8.3380(8) \text{ \AA}$ ,  $b = 17.1465(17) \text{ \AA}$ ,  $c = 19.5150(19) \text{ \AA}$ ,  $\alpha = 93.214(2)^\circ$ ,  $\beta = 101.586(2)^\circ$ ,  $\gamma = 92.351(2)^\circ$ ,  $V = 2725.0(5) \text{ \AA}^3$ , are based upon the refinement of the XYZ-centroids of 9995 reflections above  $20 \sigma(I)$  with  $4.765^\circ < 2\theta < 60.17^\circ$ . Data were corrected for absorption effects using the multi-scan method (SADABS). The

calculated minimum and maximum transmission coefficients (based on crystal size) are 0.5750 and 0.8680.

The structure was solved and refined using the Bruker SHELXTL Software Package, using the space group P-1, with Z = 4 for the formula unit, C<sub>25</sub>H<sub>22</sub>Cl<sub>4</sub>N<sub>2</sub>O<sub>4</sub>PtS. The final anisotropic full-matrix least-squares refinement on F<sup>2</sup> with 671 variables converged at R<sub>1</sub> = 4.53%, for the observed data and wR<sub>2</sub> = 9.82% for all data. The goodness-of-fit was 1.134. The largest peak in the final difference electron density synthesis was 1.843 e<sup>-</sup>/Å<sup>3</sup> and the largest hole was -2.635 e<sup>-</sup>/Å<sup>3</sup> with an RMS deviation of 0.170 e<sup>-</sup>/Å<sup>3</sup>. On the basis of the final model, the calculated density was 1.910 g/cm<sup>3</sup> and F(000), 1520 e<sup>-</sup>.

APEX2 Version 2010.11-3 (Bruker AXS Inc.)

SAINT Version 7.68A (Bruker AXS Inc., 2009)

SADABS Version 2008/1 (G. M. Sheldrick, Bruker AXS Inc.)

XPREF Version 2008/2 (G. M. Sheldrick, Bruker AXS Inc.)

XS/XT Version 2014 (G. M. Sheldrick, (2014) University of Gottingen, Germany)

XL Version 2014 (G. M. Sheldrick, (2014) University of Gottingen, Germany)

Platon (A. L. Spek, *Acta Cryst.* (1990). A46, C-34)

**Table S3.** Sample and crystal data for **7a**.

|                               |                                                                                                                    |
|-------------------------------|--------------------------------------------------------------------------------------------------------------------|
| <b>Identification code</b>    | 2731                                                                                                               |
| <b>Chemical formula</b>       | C <sub>25</sub> H <sub>22</sub> Cl <sub>4</sub> N <sub>2</sub> O <sub>4</sub> PtS                                  |
| <b>Formula weight</b>         | 783.39                                                                                                             |
| <b>Temperature</b>            | 150(2) K                                                                                                           |
| <b>Wavelength</b>             | 0.71073 Å                                                                                                          |
| <b>Crystal size</b>           | 0.03 × 0.13 × 0.19 mm                                                                                              |
| <b>Crystal habit</b>          | colorless plate                                                                                                    |
| <b>Crystal system</b>         | triclinic                                                                                                          |
| <b>Space group</b>            | P-1                                                                                                                |
| <b>Unit cell dimensions</b>   | a = 8.3380(8) Å      α = 93.214(2)°<br>b = 17.1465(17) Å    β = 101.586(2)°<br>c = 19.5150(19) Å    γ = 92.351(2)° |
| <b>Volume</b>                 | 2725.0(5) Å <sup>3</sup>                                                                                           |
| <b>Z</b>                      | 4                                                                                                                  |
| <b>Density (calculated)</b>   | 1.910 Mg/cm <sup>3</sup>                                                                                           |
| <b>Absorption coefficient</b> | 5.654 mm <sup>-1</sup>                                                                                             |
| <b>F(000)</b>                 | 1520                                                                                                               |

**Table S4.** Data collection and structure refinement for **7a**.

|                                            |                                                                                                                                                                     |
|--------------------------------------------|---------------------------------------------------------------------------------------------------------------------------------------------------------------------|
| <b>Diffractometer</b>                      | Bruker APEX-II CCD                                                                                                                                                  |
| <b>Radiation source</b>                    | sealed tube, MoK $\alpha$                                                                                                                                           |
| <b>Theta range for data collection</b>     | 2.13 to 26.50°                                                                                                                                                      |
| <b>Index ranges</b>                        | -10 $\leq h \leq$ 10, -21 $\leq k \leq$ 21, -24 $\leq l \leq$ 24                                                                                                    |
| <b>Reflections collected</b>               | 34997                                                                                                                                                               |
| <b>Independent reflections</b>             | 11312 [R(int) = 0.0433]                                                                                                                                             |
| <b>Coverage of independent reflections</b> | 99.9%                                                                                                                                                               |
| <b>Absorption correction</b>               | multi-scan                                                                                                                                                          |
| <b>Max. and min. transmission</b>          | 0.8680 and 0.5750                                                                                                                                                   |
| <b>Structure solution technique</b>        | direct methods                                                                                                                                                      |
| <b>Structure solution program</b>          | ShelXS-97 (Sheldrick, 2008)                                                                                                                                         |
| <b>Refinement method</b>                   | Full-matrix least-squares on F <sup>2</sup>                                                                                                                         |
| <b>Refinement program</b>                  | ShelXL-2014 (Sheldrick, 2014)                                                                                                                                       |
| <b>Function minimized</b>                  | $\Sigma w(F_o^2 - F_c^2)^2$                                                                                                                                         |
| <b>Data / restraints / parameters</b>      | 11312 / 0 / 671                                                                                                                                                     |
| <b>Goodness-of-fit on F<sup>2</sup></b>    | 1.134                                                                                                                                                               |
| <b><math>\Delta/\sigma_{\max}</math></b>   | 0.002                                                                                                                                                               |
| <b>Final R indices</b>                     | 9327 data; I>2 $\sigma$ (I)    R <sub>1</sub> = 0.0453, wR <sub>2</sub> = 0.0939<br>all data                      R <sub>1</sub> = 0.0595, wR <sub>2</sub> = 0.0982 |
| <b>Weighting scheme</b>                    | w=1/[ $\sigma^2(F_o^2)$ +(0.0283P) <sup>2</sup> +19.8722P],<br>P=(F <sub>o</sub> <sup>2</sup> +2F <sub>c</sub> <sup>2</sup> )/3                                     |
| <b>Largest diff. peak and hole</b>         | 1.843 and -2.635 eÅ <sup>-3</sup>                                                                                                                                   |
| <b>R.M.S. deviation from mean</b>          | 0.170 eÅ <sup>-3</sup>                                                                                                                                              |

$$R_{\text{int}} = \Sigma |F_o^2 - F_o^2(\text{mean})| / \Sigma [F_o^2]$$

$$R_1 = \Sigma ||F_o| - |F_c|| / \Sigma |F_o|$$

$$\text{GOOF} = S = \{ \Sigma [w(F_o^2 - F_c^2)^2] / (n - p) \}^{1/2}$$

$$wR_2 = \{ \Sigma [w(F_o^2 - F_c^2)^2] / \Sigma [w(F_o^2)^2] \}^{1/2}$$

### Crystal Structure Determination for **10a** (Figure S)

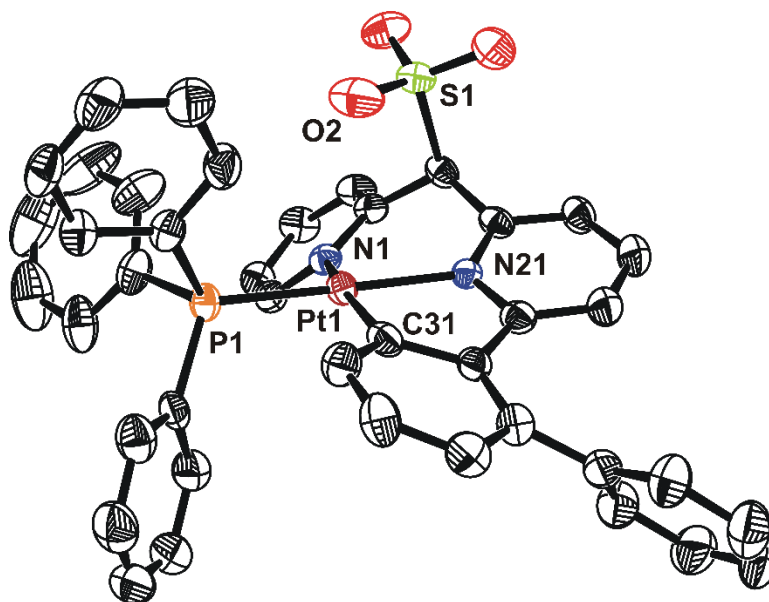

**Figure S35.** ORTEP plot for **10a**.

A yellow prism-like specimen of  $\text{C}_{45}\text{H}_{41}\text{N}_2\text{O}_4\text{PPtS}$ , approximate dimensions 0.08 mm  $\times$  0.14 mm  $\times$  0.34 mm, was used for the X-ray crystallographic analysis. The X-ray intensity data were measured on a Bruker APEX-II CCD system equipped with a graphite monochromator and a MoK $\alpha$  sealed tube ( $\lambda = 0.71073$  Å). Data collection temperature was 250 K.

The total exposure time was 8.42 hours. The frames were integrated with the Bruker SAINT software package using a narrow-frame algorithm. The integration of the data using a monoclinic unit cell yielded a total of 49518 reflections to a maximum  $\theta$  angle of  $26.50^\circ$  (0.80 Å resolution), of which 7940 were independent (average redundancy 6.237, completeness = 100.0%,  $R_{\text{int}} = 6.97\%$ ) and 6143 (77.37%) were greater than  $2\sigma(F^2)$ . The final cell constants of  $a = 8.7588(11)$  Å,  $b = 31.809(4)$  Å,  $c = 13.8220(17)$  Å,  $\beta = 95.629(2)^\circ$ ,  $V = 3832.4(8)$  Å<sup>3</sup>, are based upon the refinement of the XYZ-centroids of 9973 reflections above  $20\sigma(I)$  with  $4.845^\circ < 2\theta < 49.80^\circ$ . Data were corrected for absorption effects using the multi-scan method (SADABS). The calculated minimum and maximum transmission coefficients (based on crystal size) are 0.5050 and 0.7380.

The structure was solved and refined using the Bruker SHELXTL Software Package, using the space group **P21/n**, with  $Z = 4$  for the formula unit, **C<sub>45</sub>H<sub>41</sub>N<sub>2</sub>O<sub>4</sub>PpTs**. The final anisotropic full-matrix least-squares refinement on  $F^2$  with **489** variables converged at  $R_1 = 3.97\%$ , for the observed data and  $wR_2 = 8.81\%$  for all data. The goodness-of-fit was **1.064**. The largest peak in the final difference electron density synthesis was **1.858** e/ $\text{\AA}^3$  and the largest hole was **-1.440** e/ $\text{\AA}^3$  with an RMS deviation of **0.116** e/ $\text{\AA}^3$ . On the basis of the final model, the calculated density was **1.615**g/cm<sup>3</sup> and  $F(000)$ , **1864** e<sup>-</sup>.

APEX2 Version 2010.11-3 (Bruker AXS Inc.)  
 SAINT Version 7.68A (Bruker AXS Inc., 2009)  
 SADABS Version 2008/1 (G. M. Sheldrick, Bruker AXS Inc.)  
 XPREP Version 2008/2 (G. M. Sheldrick, Bruker AXS Inc.)  
 XS Version 2008/1 (G. M. Sheldrick, *Acta Cryst.* (2008). **A64**, 112-122)  
 XL Version 2012/4 (G. M. Sheldrick, (2012) University of Gottingen, Germany)  
 Platon (A. L. Spek, *Acta Cryst.* (1990). **A46**, C-34)

**Table S5.** Sample and crystal data for **10a**.

|                             |                                                                                                           |
|-----------------------------|-----------------------------------------------------------------------------------------------------------|
| <b>Identification code</b>  | 2677                                                                                                      |
| <b>Chemical formula</b>     | C <sub>45</sub> H <sub>41</sub> N <sub>2</sub> O <sub>4</sub> PpTs                                        |
| <b>Formula weight</b>       | 931.92                                                                                                    |
| <b>Temperature</b>          | 250(2) K                                                                                                  |
| <b>Wavelength</b>           | 0.71073 Å                                                                                                 |
| <b>Crystal size</b>         | 0.08 × 0.14 × 0.34 mm                                                                                     |
| <b>Crystal habit</b>        | yellow prism                                                                                              |
| <b>Crystal system</b>       | monoclinic                                                                                                |
| <b>Space group</b>          | P21/n                                                                                                     |
| <b>Unit cell dimensions</b> | $a = 8.7588(11) \text{ \AA}$ $\alpha = 90^\circ$<br>$b = 31.809(4) \text{ \AA}$ $\beta = 95.629(2)^\circ$ |



|                               |                                                   |
|-------------------------------|---------------------------------------------------|
|                               | $c = 13.8220(17) \text{ \AA}$ $\gamma = 90^\circ$ |
| <b>Volume</b>                 | $3832.4(8) \text{ \AA}^3$                         |
| <b>Z</b>                      | 4                                                 |
| <b>Density (calculated)</b>   | $1.615 \text{ Mg/cm}^3$                           |
| <b>Absorption coefficient</b> | $3.805 \text{ mm}^{-1}$                           |
| <b>F(000)</b>                 | 1864                                              |

**Table S6.** Data collection and structure refinement for **10a**.

|                                            |                                                                    |
|--------------------------------------------|--------------------------------------------------------------------|
| <b>Diffractometer</b>                      | Bruker APEX-II CCD                                                 |
| <b>Radiation source</b>                    | sealed tube, MoK $\alpha$                                          |
| <b>Theta range for data collection</b>     | $1.96$ to $26.50^\circ$                                            |
| <b>Index ranges</b>                        | $-10 \leq h \leq 10$ , $-39 \leq k \leq 39$ , $-17 \leq l \leq 17$ |
| <b>Reflections collected</b>               | 49518                                                              |
| <b>Independent reflections</b>             | 7940 [R(int) = 0.0697]                                             |
| <b>Coverage of independent reflections</b> | 100.0%                                                             |
| <b>Absorption correction</b>               | multi-scan                                                         |
| <b>Max. and min. transmission</b>          | 0.7380 and 0.5050                                                  |
| <b>Structure solution technique</b>        | direct methods                                                     |
| <b>Structure solution program</b>          | ShelXS-97 (Sheldrick, 2008)                                        |
| <b>Refinement method</b>                   | Full-matrix least-squares on $F^2$                                 |
| <b>Refinement program</b>                  | ShelXL-2014 (Sheldrick, 2014)                                      |

|                                            |                                                                                 |
|--------------------------------------------|---------------------------------------------------------------------------------|
| <b>Function minimized</b>                  | $\Sigma w(F_o^2 - F_c^2)^2$                                                     |
| <b>Data / restraints / parameters</b>      | 7940 / 0 / 489                                                                  |
| <b>Goodness-of-fit on <math>F^2</math></b> | 1.064                                                                           |
| <b><math>\Delta/\sigma_{\max}</math></b>   | 0.001                                                                           |
| <b>Final R indices</b>                     | 6143 data; $I > 2\sigma(I)$ $R_1 = 0.0397$ , $wR_2 = 0.0800$                    |
|                                            | all data $R_1 = 0.0611$ , $wR_2 = 0.0881$                                       |
| <b>Weighting scheme</b>                    | $w = 1/[\sigma^2(F_o^2) + (0.0318P)^2 + 9.9600P]$ ,<br>$P = (F_o^2 + 2F_c^2)/3$ |
| <b>Largest diff. peak and hole</b>         | 1.858 and -1.440 $e\text{\AA}^{-3}$                                             |
| <b>R.M.S. deviation from mean</b>          | 0.116 $e\text{\AA}^{-3}$                                                        |

$$R_{\text{int}} = \Sigma |F_o^2 - F_o^2(\text{mean})| / \Sigma [F_o^2]$$

$$R_1 = \Sigma ||F_o| - |F_c|| / \Sigma |F_o|$$

$$\text{GOOF} = S = \{\Sigma [w(F_o^2 - F_c^2)^2] / (n - p)\}^{1/2}$$

$$wR_2 = \{\Sigma [w(F_o^2 - F_c^2)^2] / \Sigma [w(F_o^2)^2]\}^{1/2}$$

## VIII. NMR Spectra

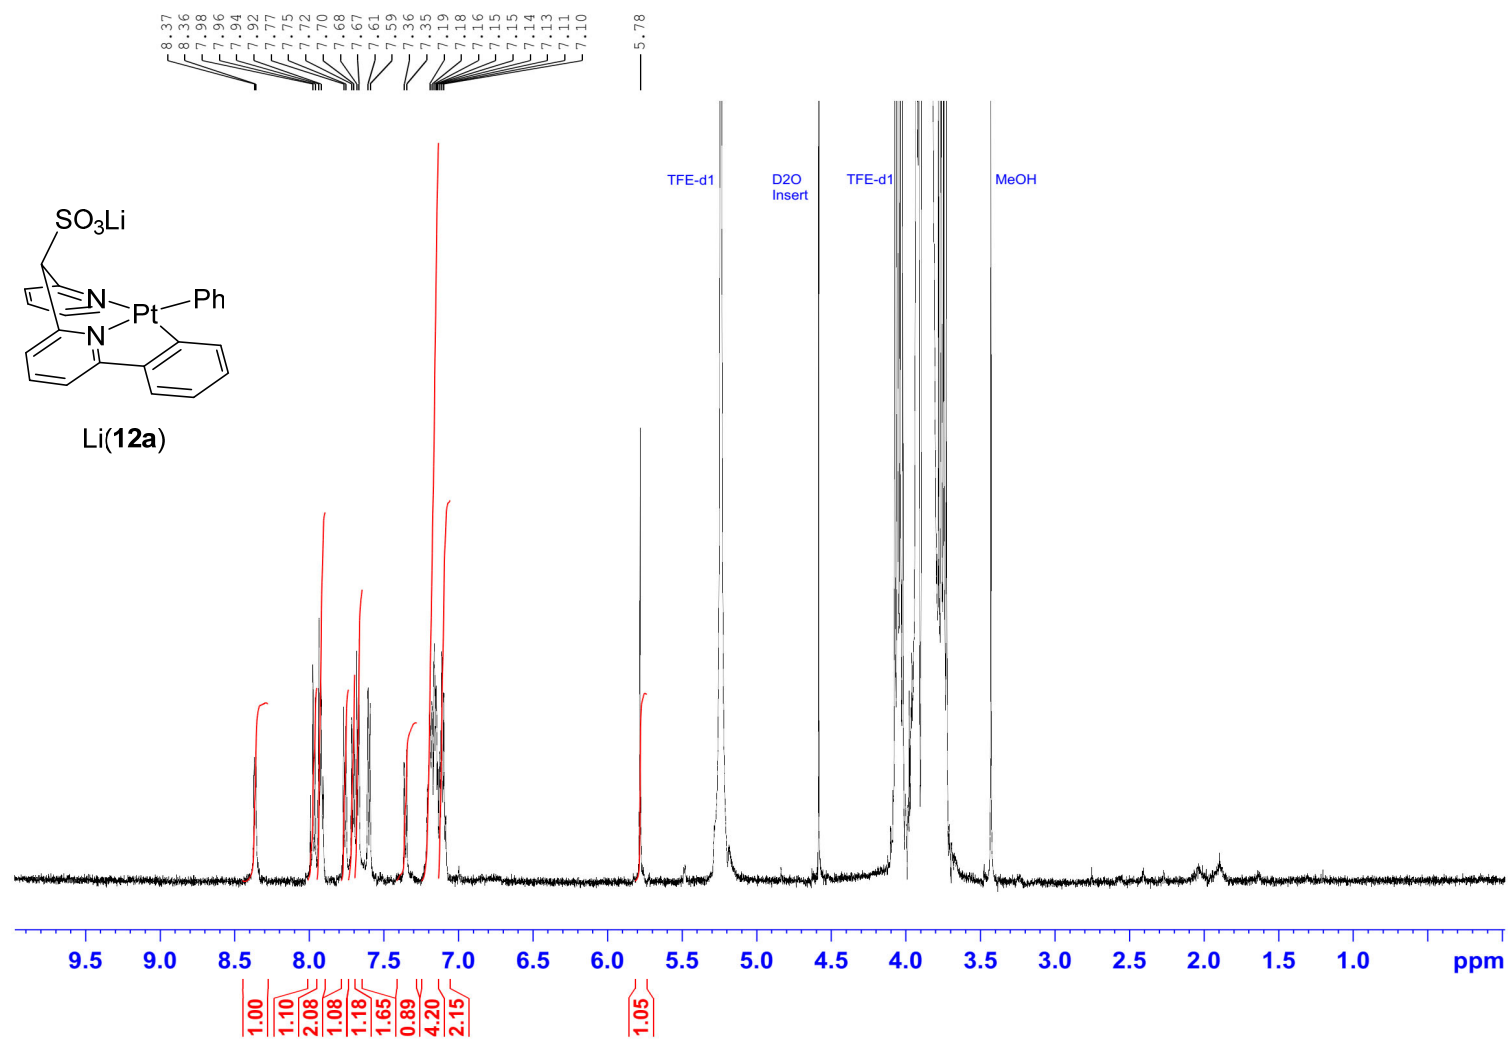

**Figure S36.** <sup>1</sup>H-NMR spectrum of Li(**12a**) in TFE-d<sub>1</sub>



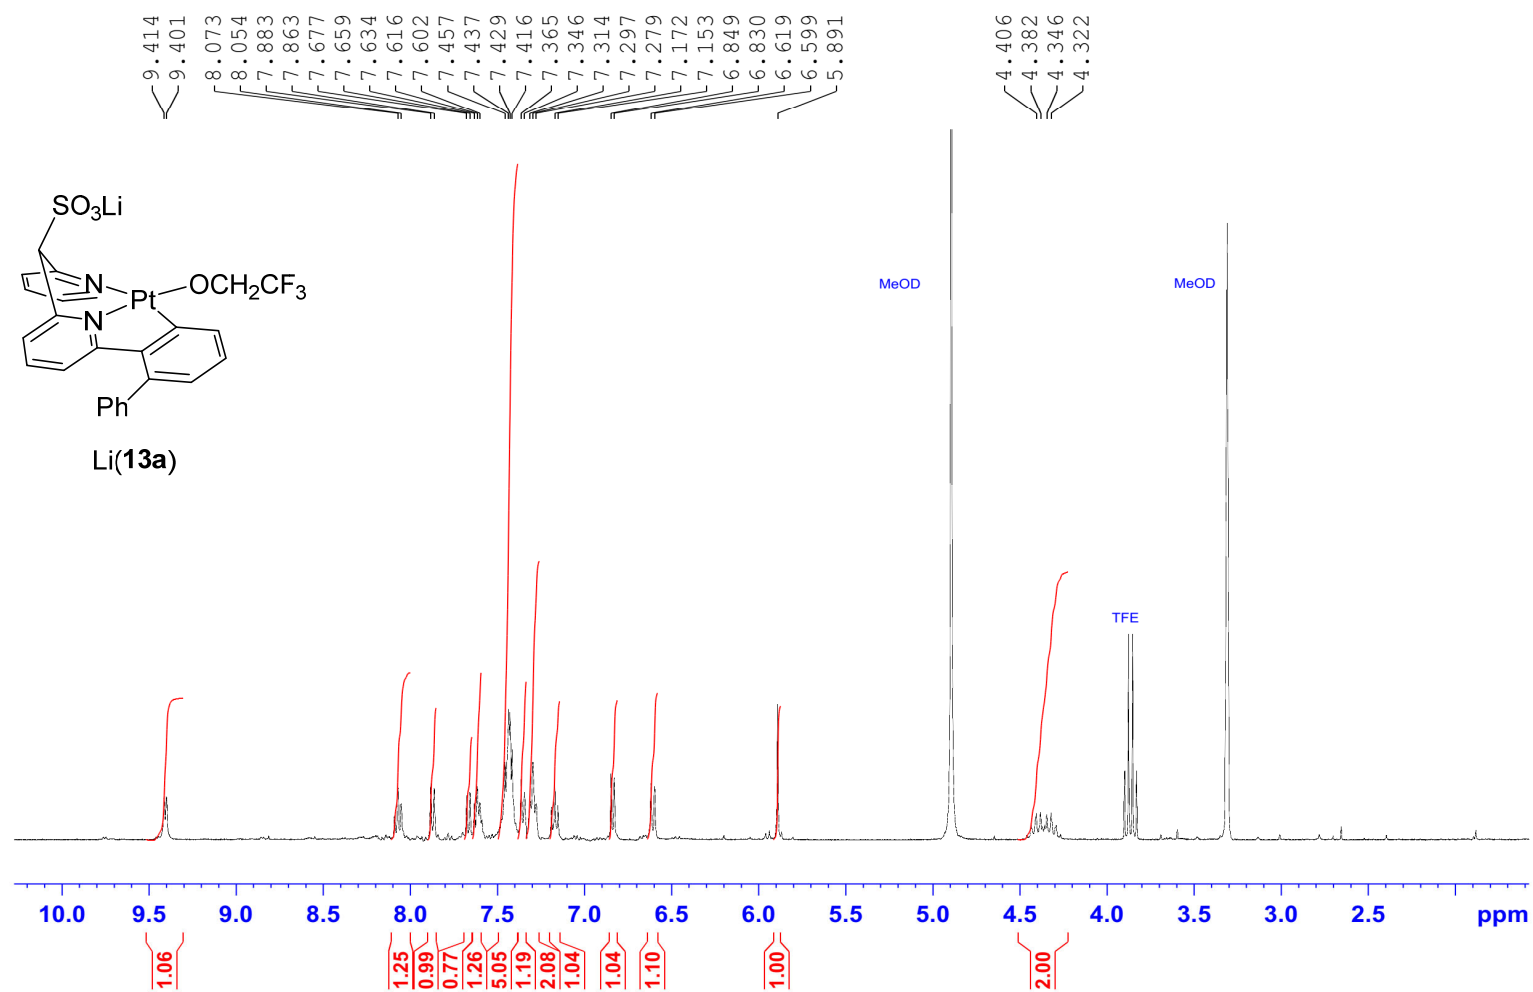

**Figure S38.** <sup>1</sup>H-NMR spectrum of Li(**13a**) in MeOD.

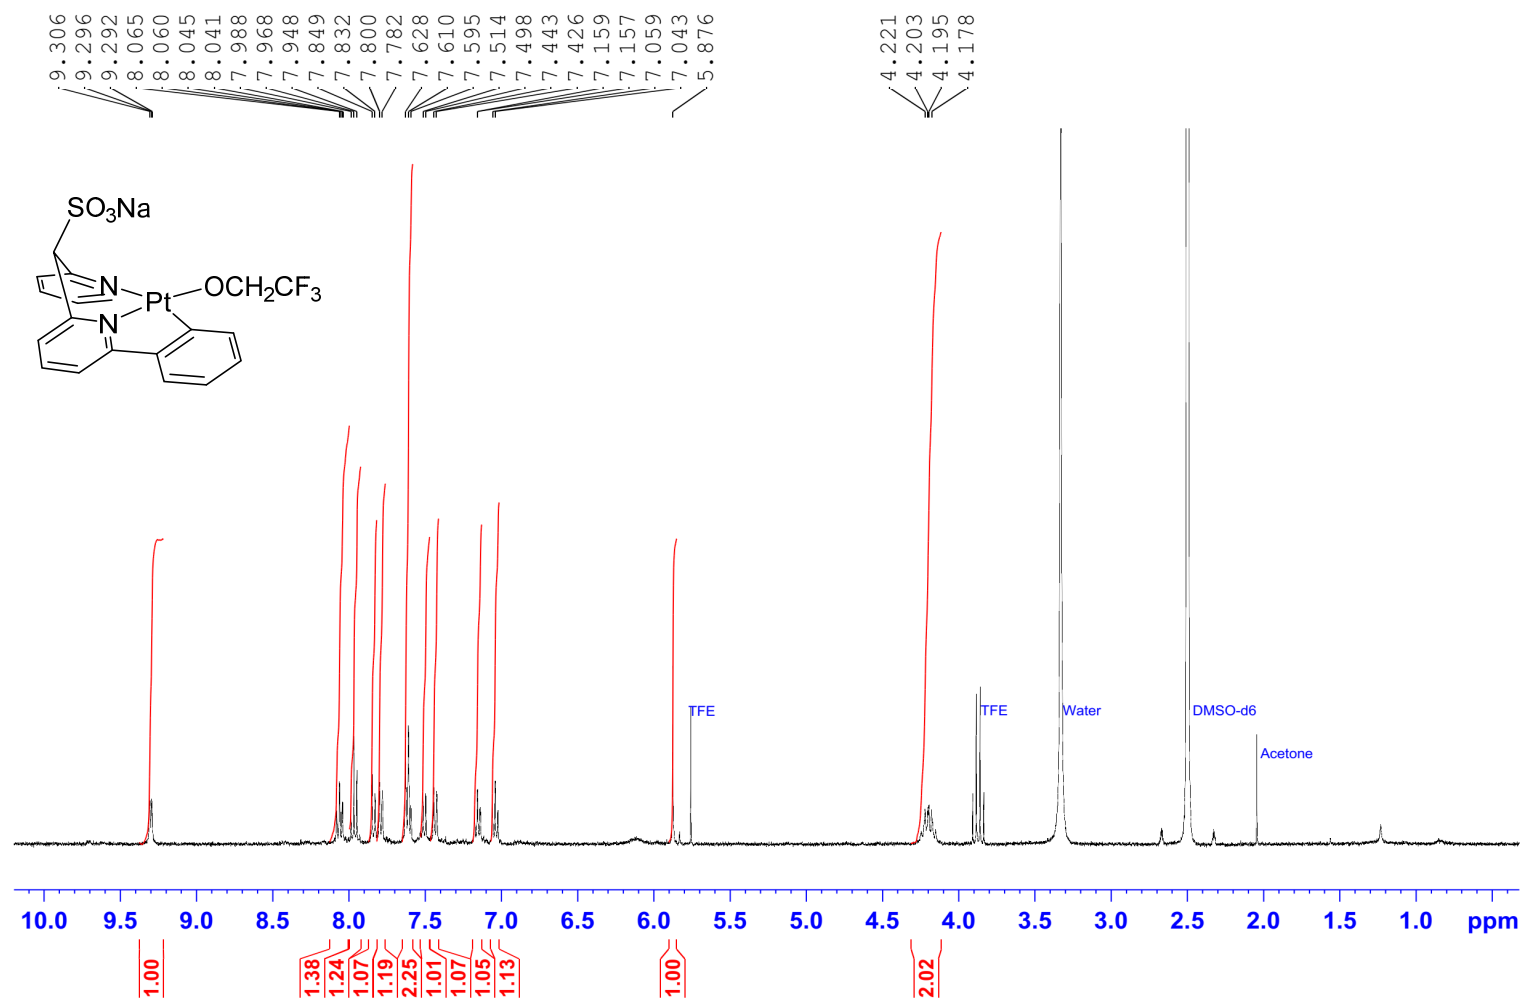

**Figure S39.** <sup>1</sup>H-NMR of Na[(C<sub>6</sub>H<sub>4</sub>-dpms)Pt(OCH<sub>2</sub>CF<sub>3</sub>)] in DMSO-d<sub>6</sub>.

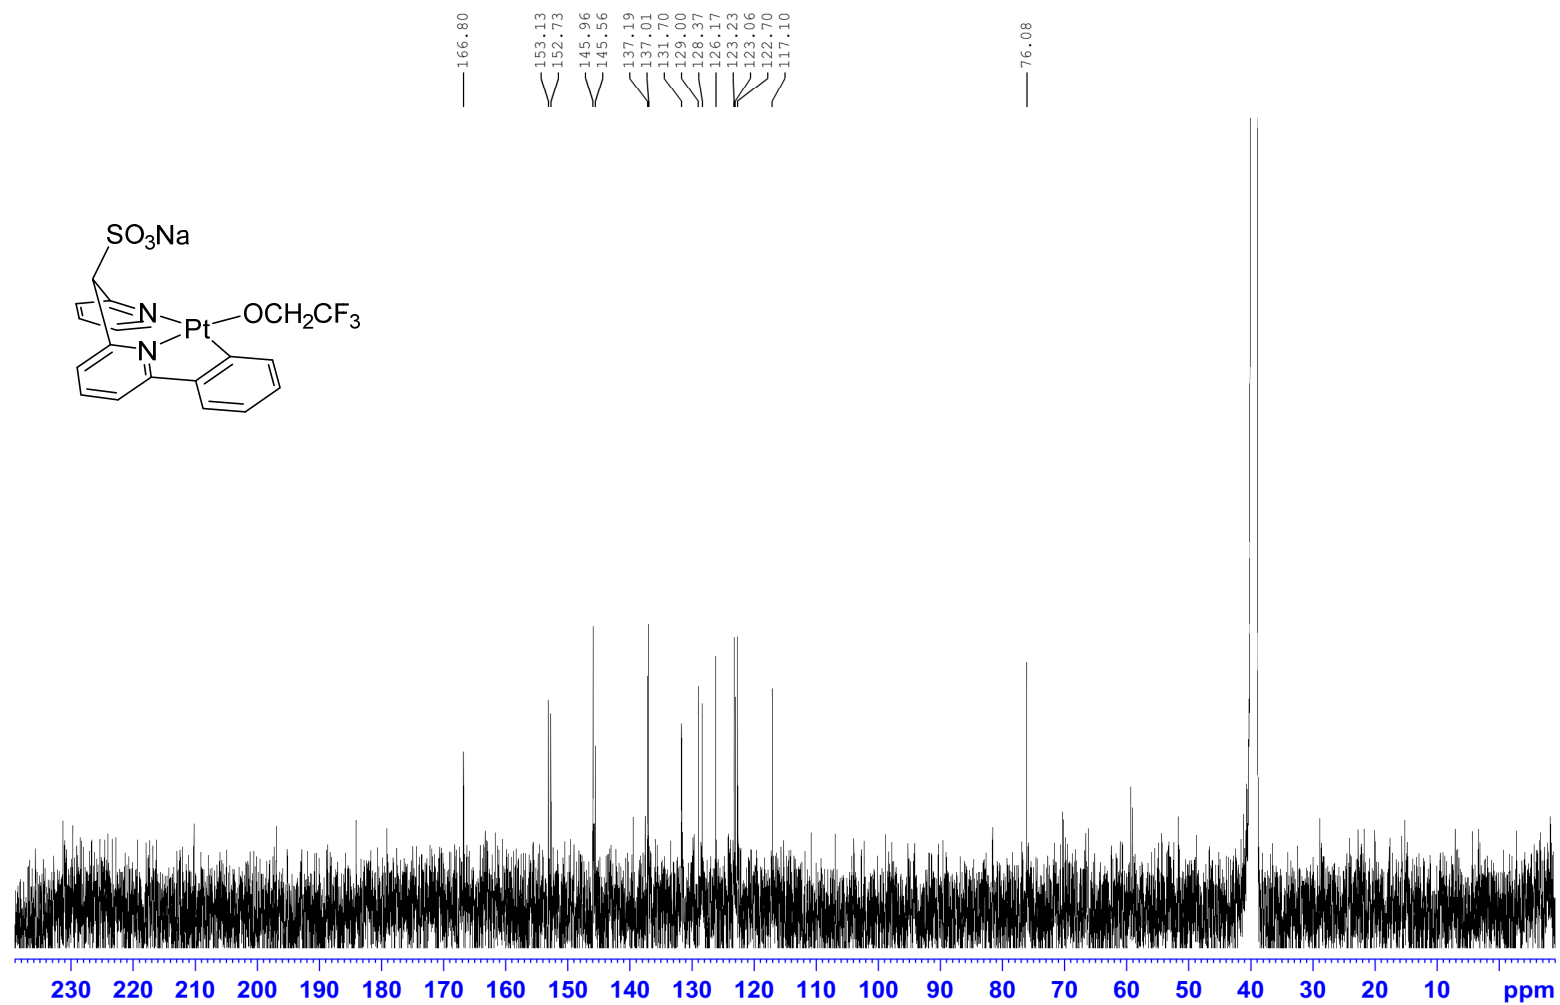

**Figure S40.**  $^{13}\text{C}$ -NMR of  $\text{Na}[(\text{C}_6\text{H}_4\text{-dpms})\text{Pt}(\text{OCH}_2\text{CF}_3)]$  in  $\text{DMSO-d}_6$ .

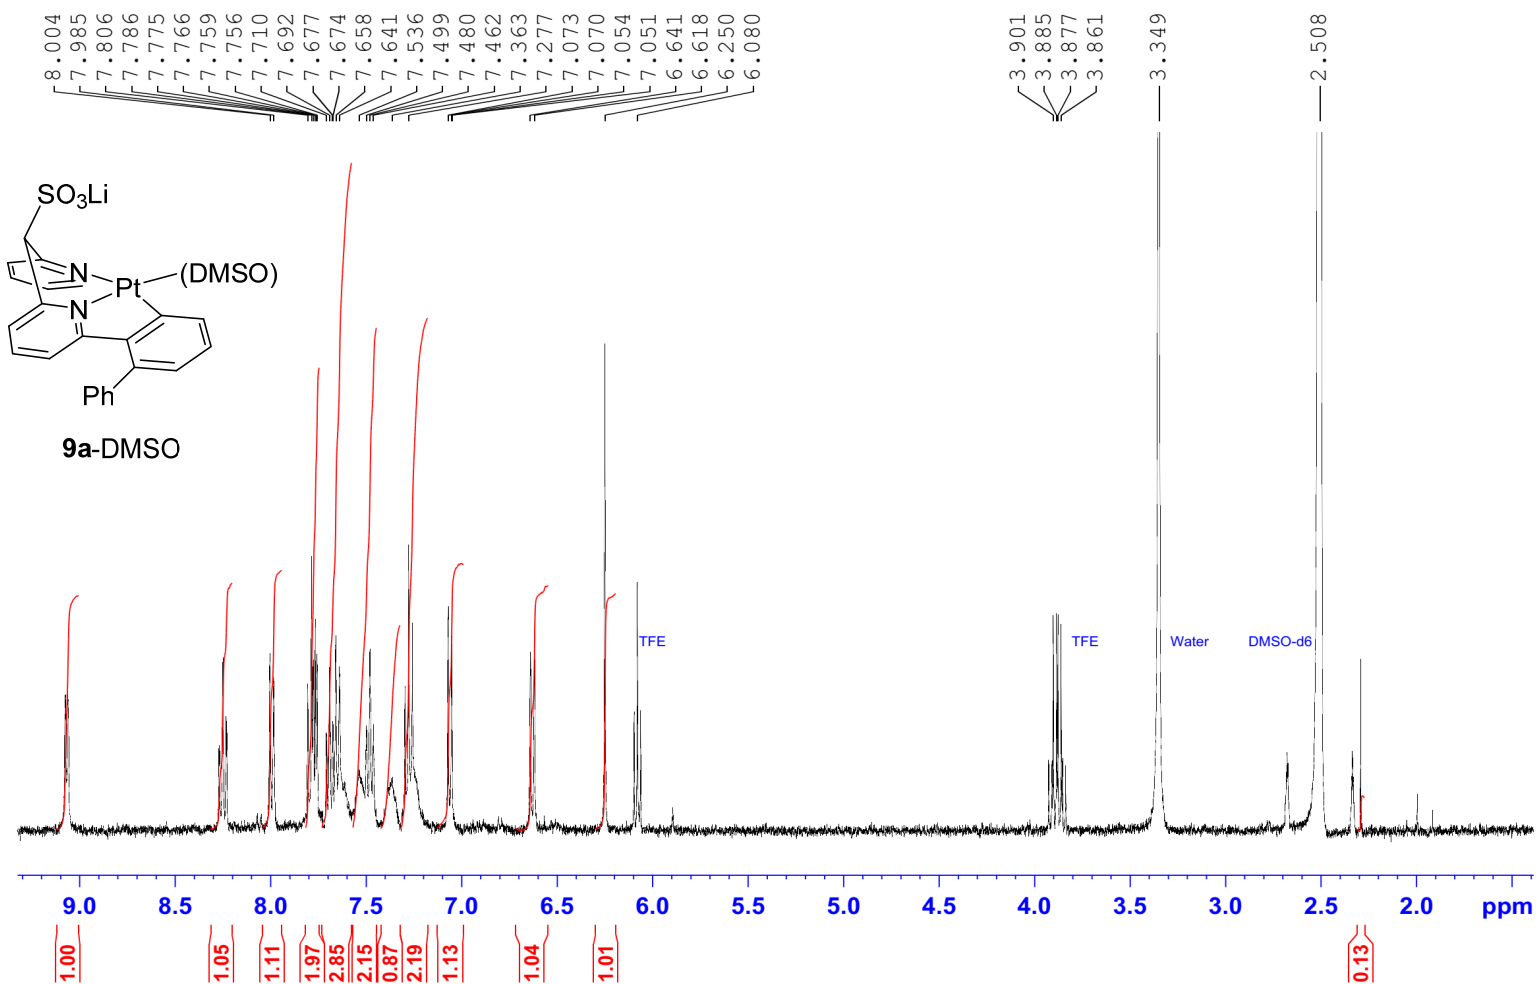

**Figure S41.** <sup>1</sup>H-NMR of 9a-DMSO in DMSO-d<sub>6</sub>.



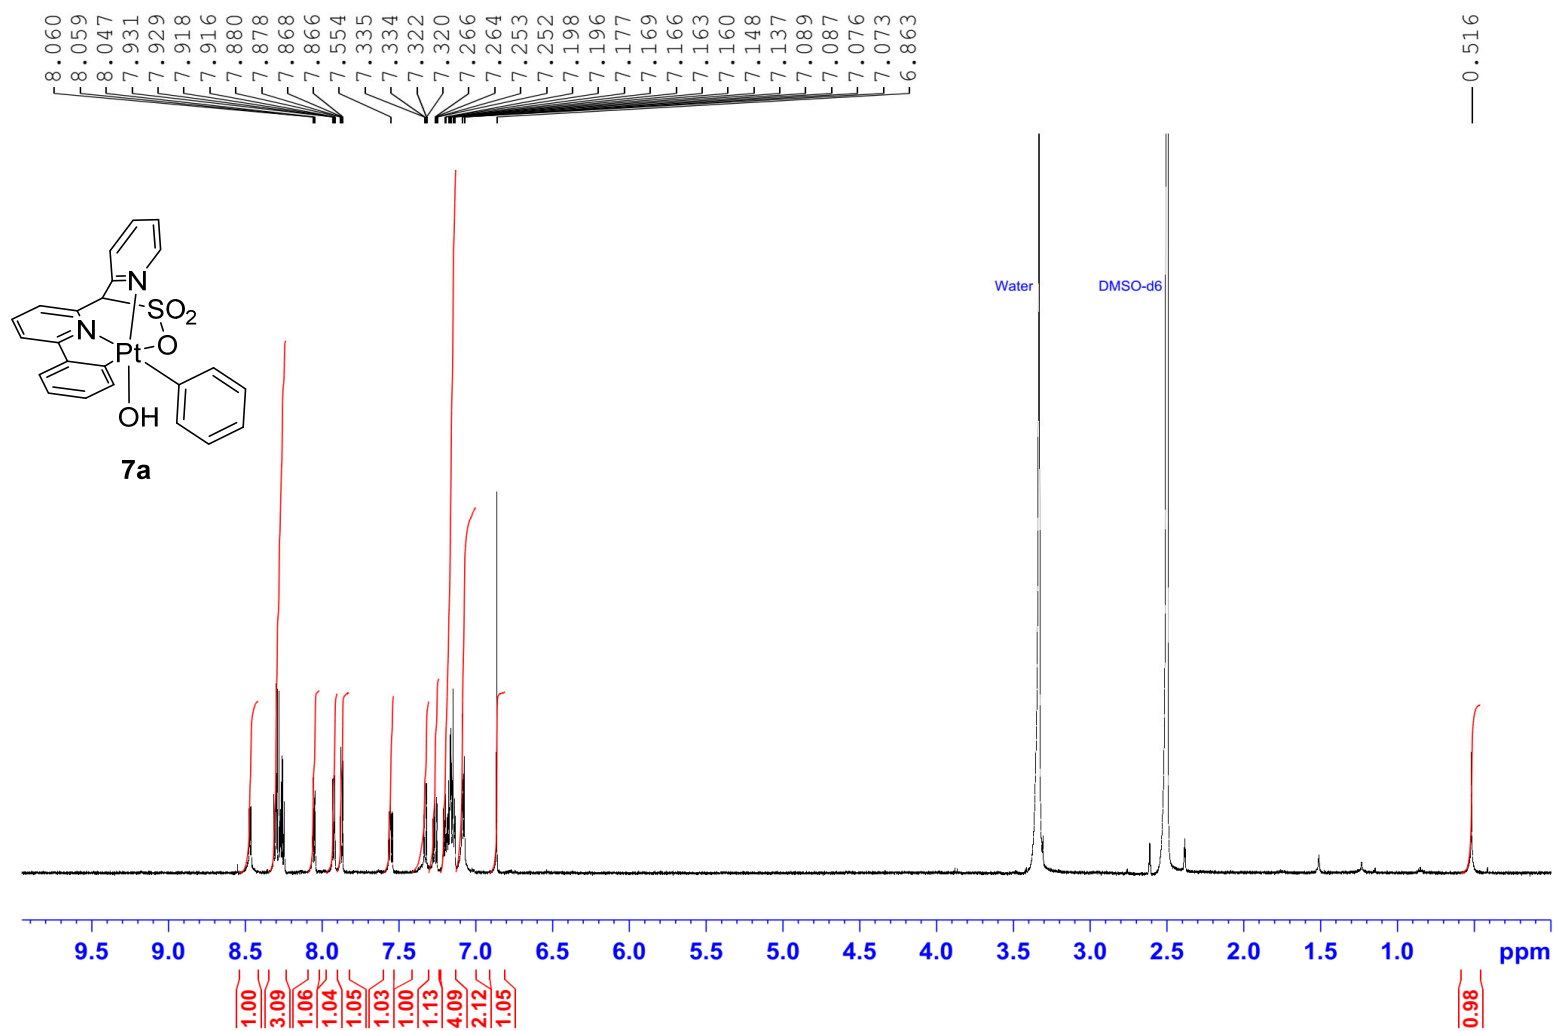

Figure S42. <sup>1</sup>H-NMR of 7a in DMSO-d<sub>6</sub>.

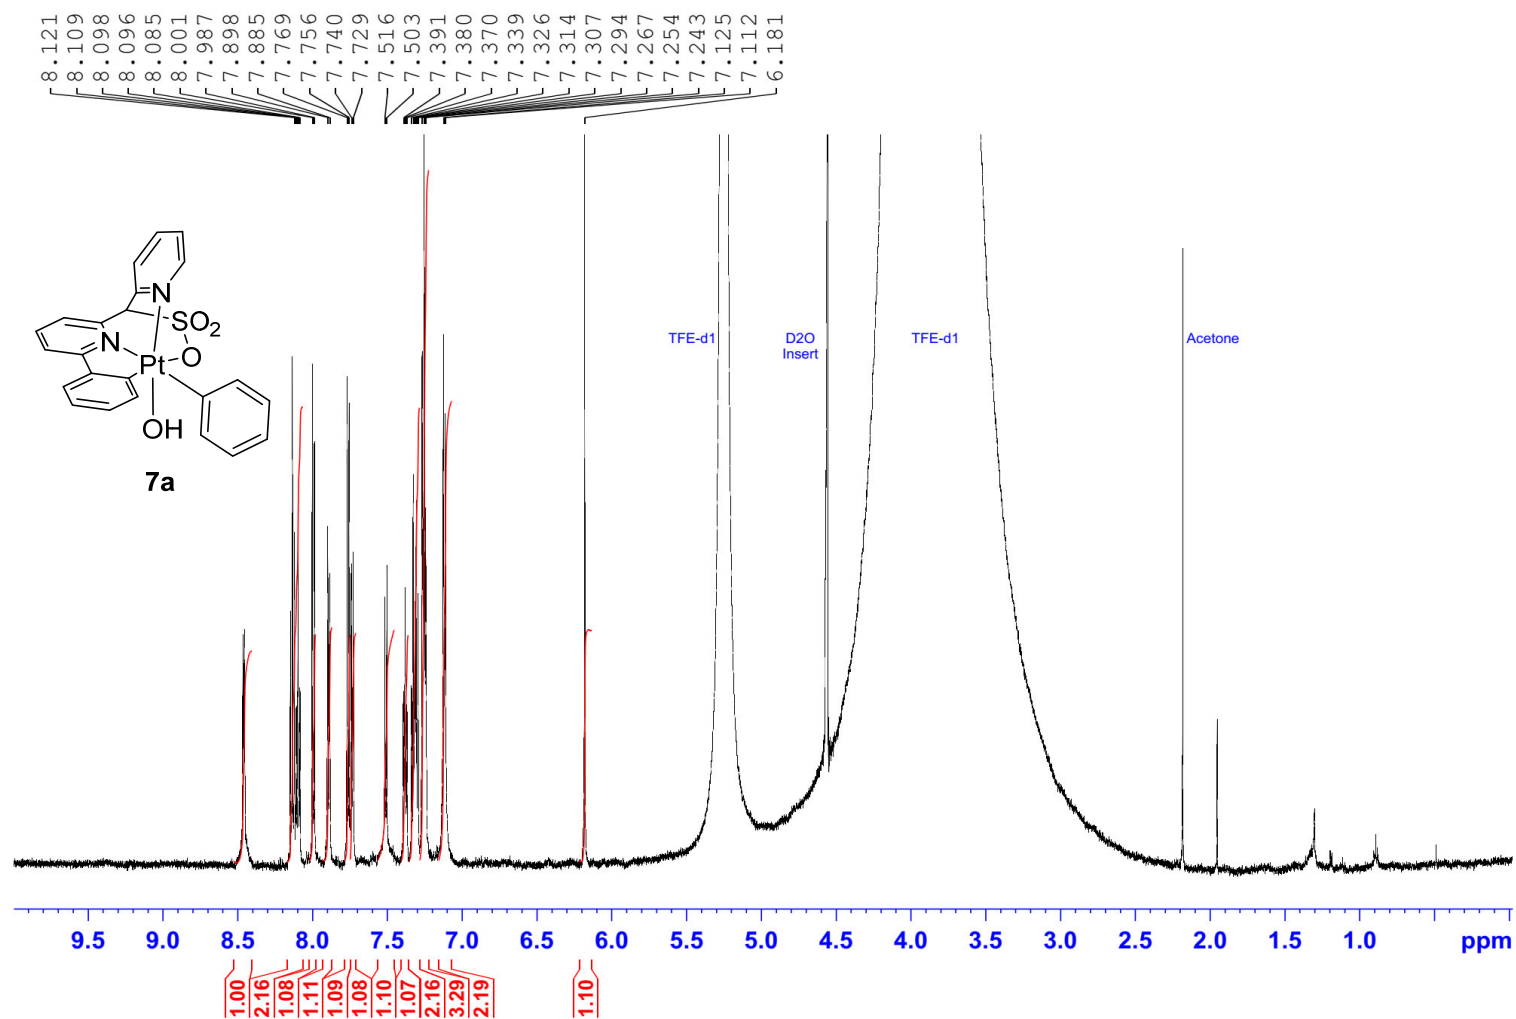

**Figure S43.**  $^1\text{H}$ -NMR of **7a** in  $\text{TFE-d}_1$ .

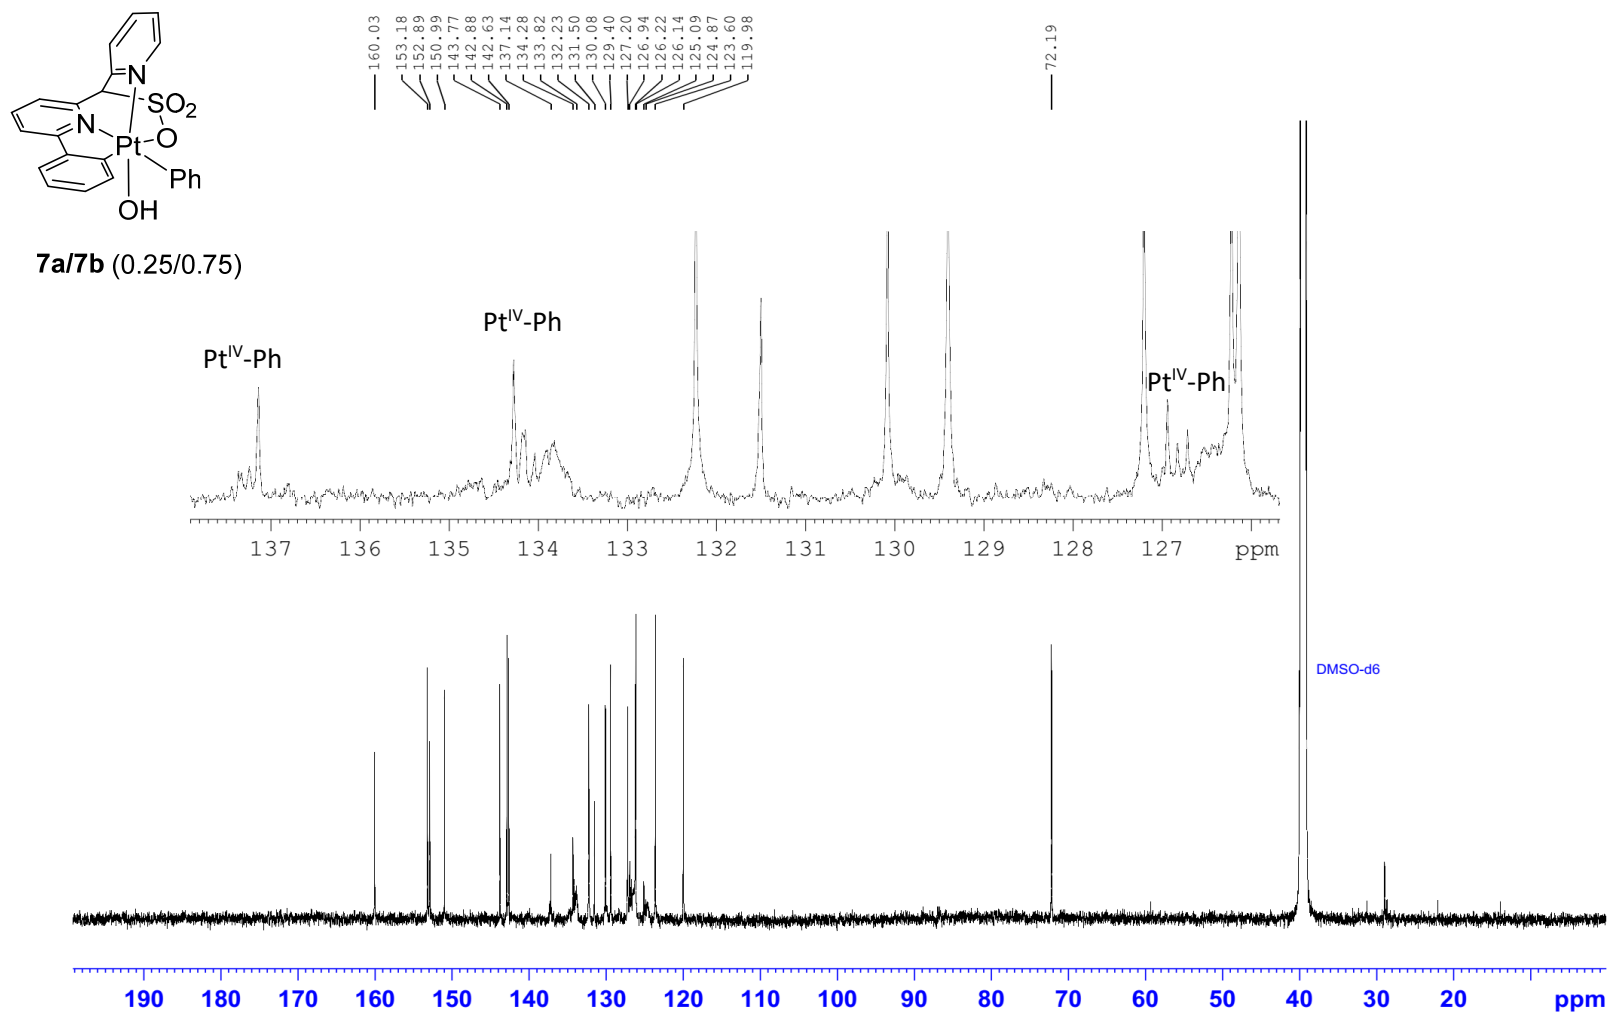

**Figure S44.** <sup>13</sup>C-NMR of a **7a/7b** mixture (**7a/7b** ≈ 0.25/0.75) in DMSO-d<sub>6</sub>. Inset shows <sup>13</sup>C signals, belonging to carbons in the Pt<sup>IV</sup>-Ph group, split by deuterium.

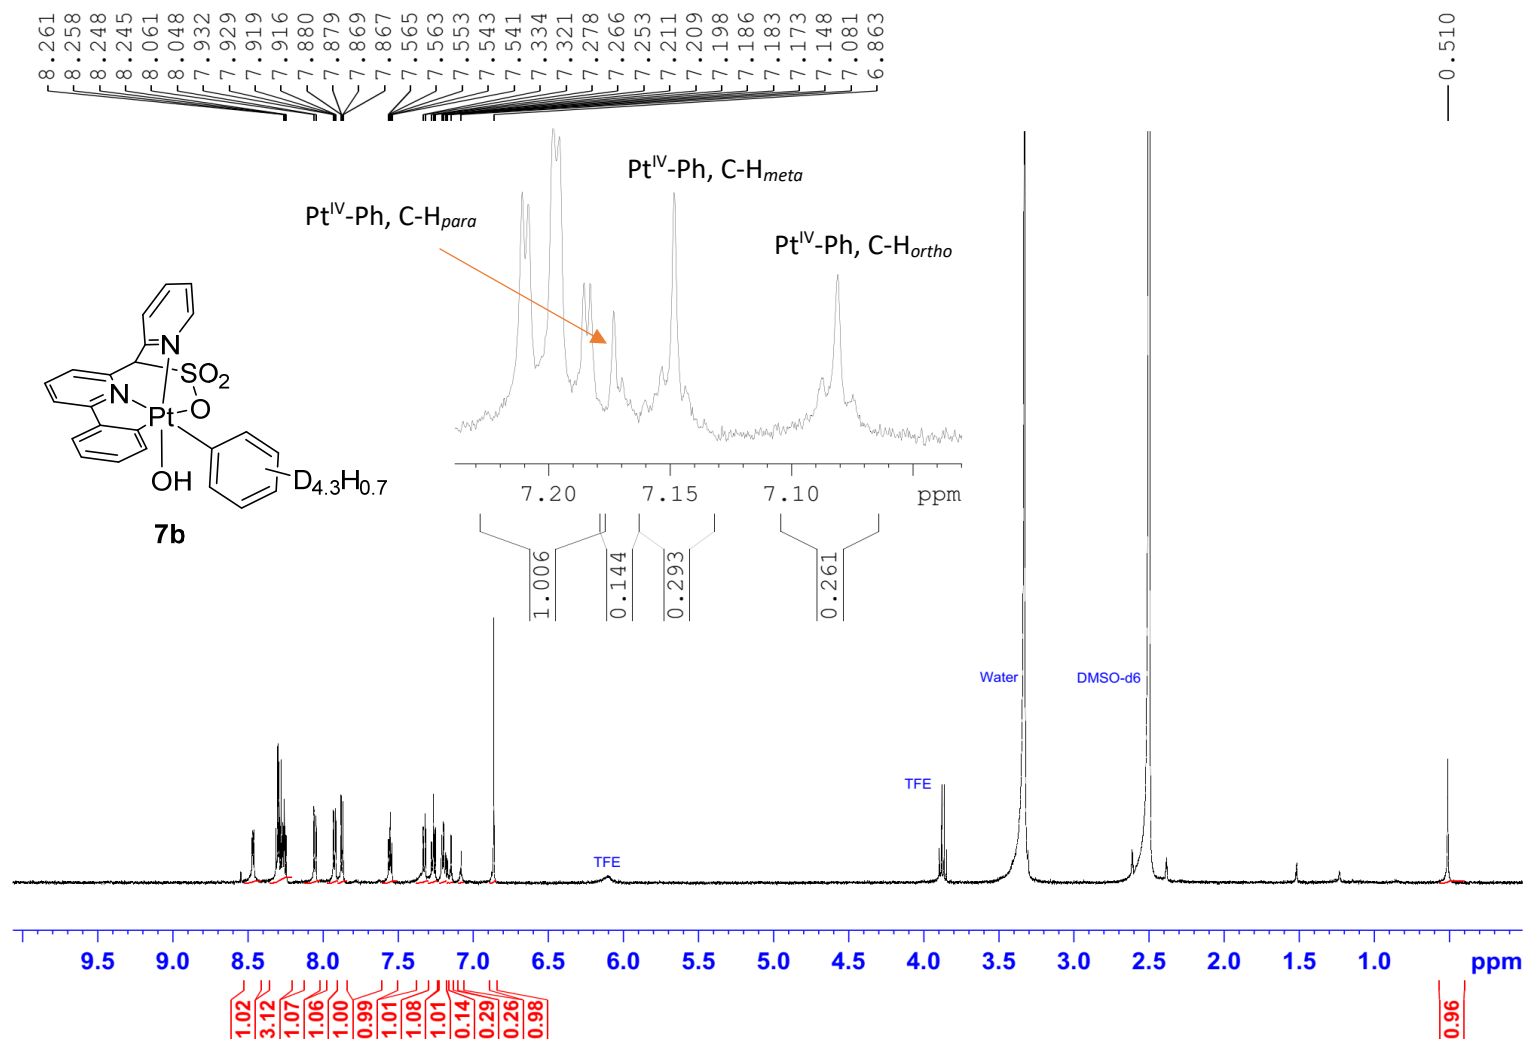

**Figure S45.**  $^1\text{H}$ -NMR of **7b** in DMSO-d<sub>6</sub> containing 15 %  $^1\text{H}$  incorporation into the phenyl group (inset).

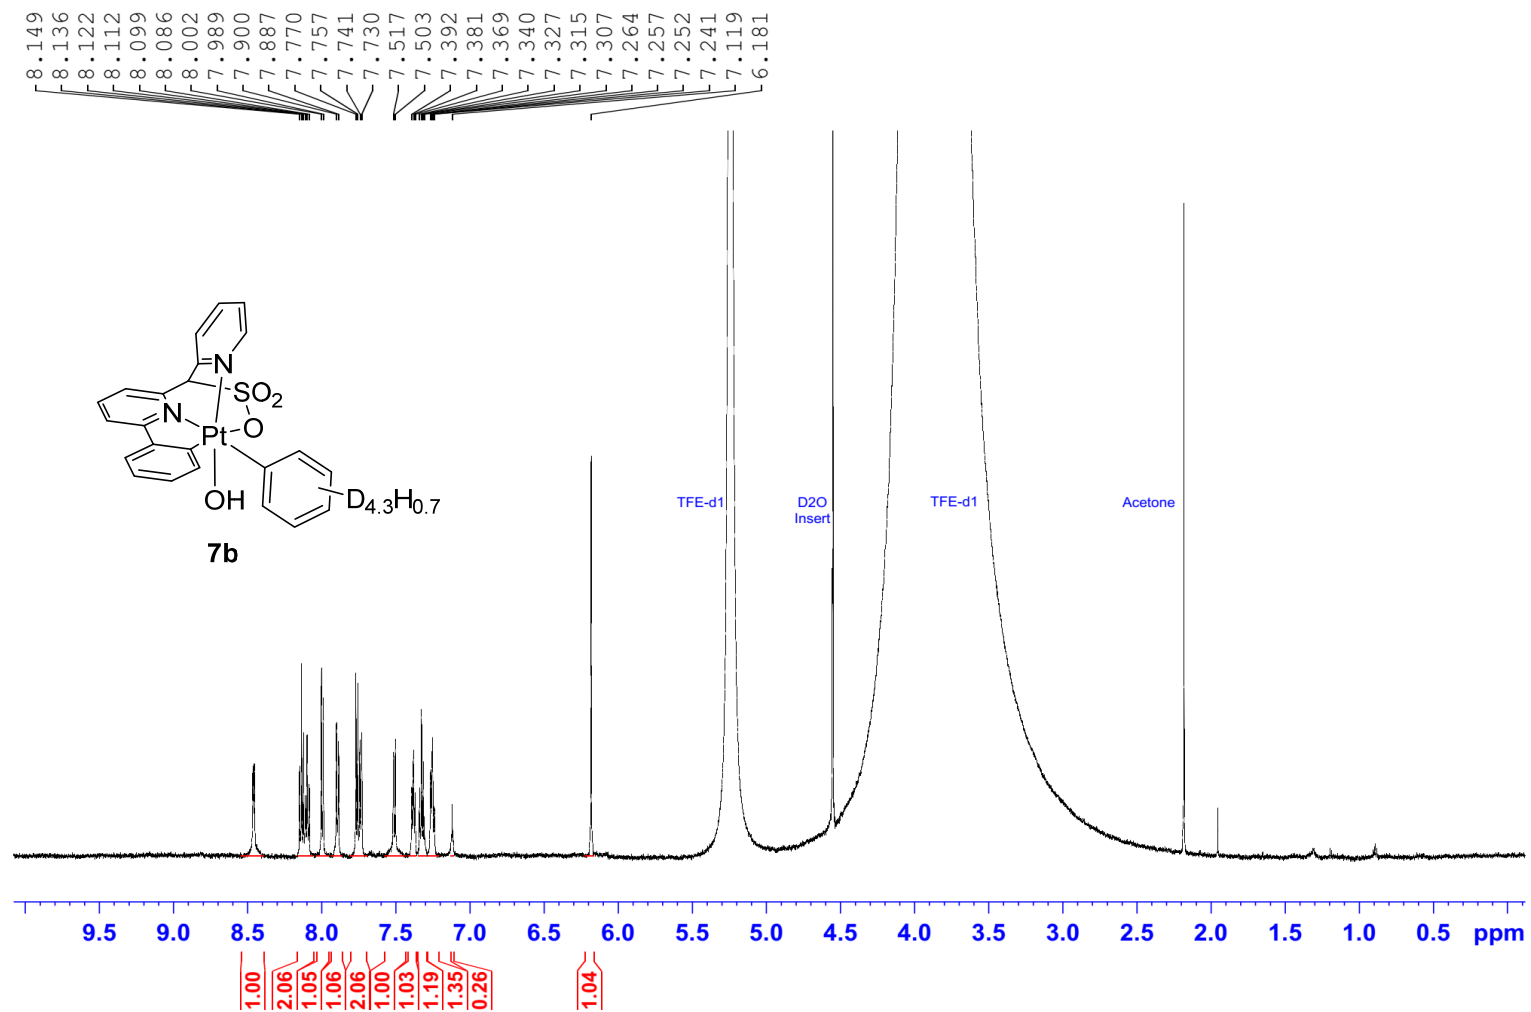

**Figure S46.**  $^1\text{H}$ -NMR of **7b** in  $\text{TFE-d}_1$ .

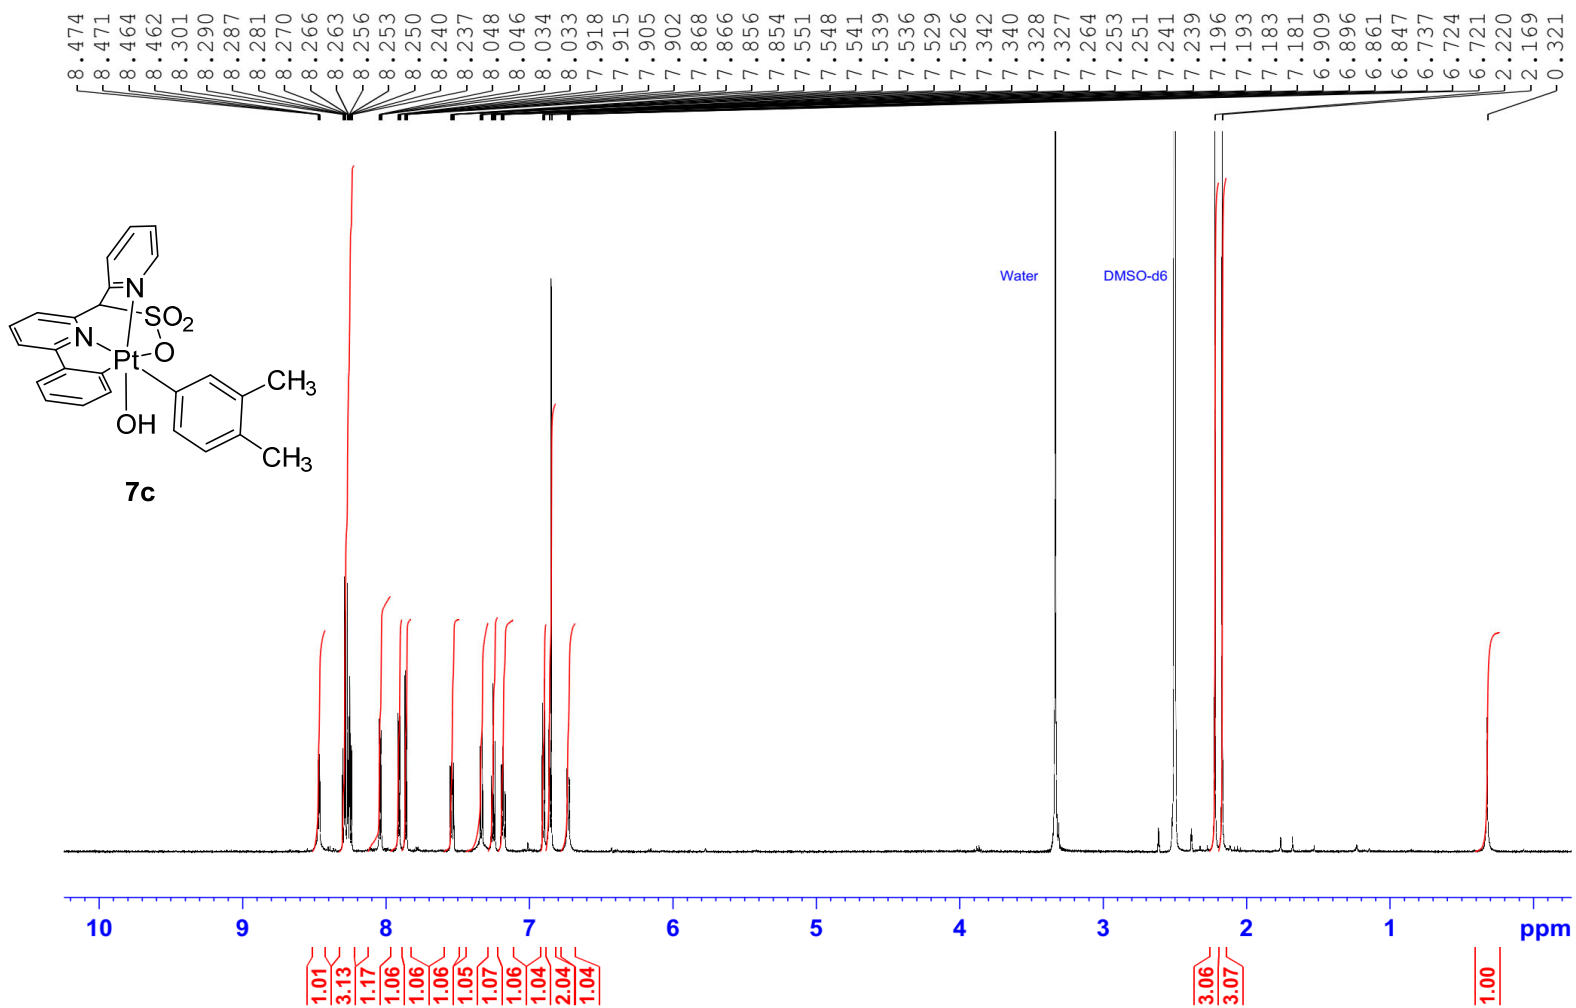

**Figure S47.** <sup>1</sup>H-NMR of **7c** in DMSO-d<sub>6</sub>.

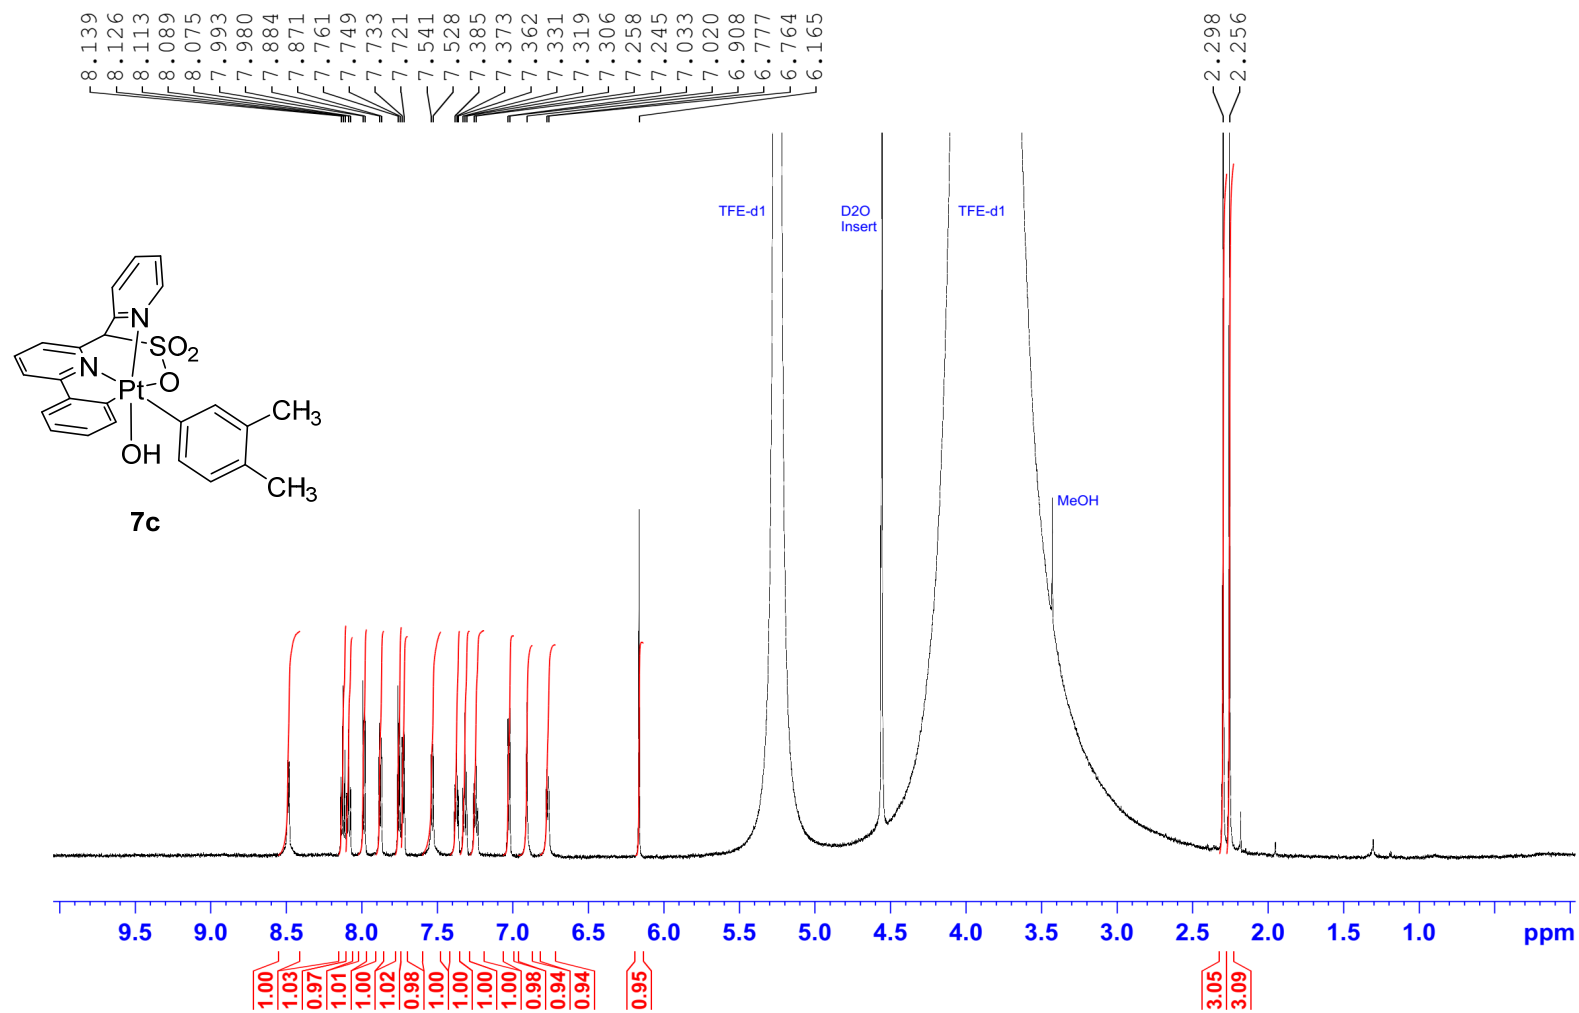

**Figure S48.**  $^1\text{H}$ -NMR of **7c** in TFE- $\text{d}_1$ .

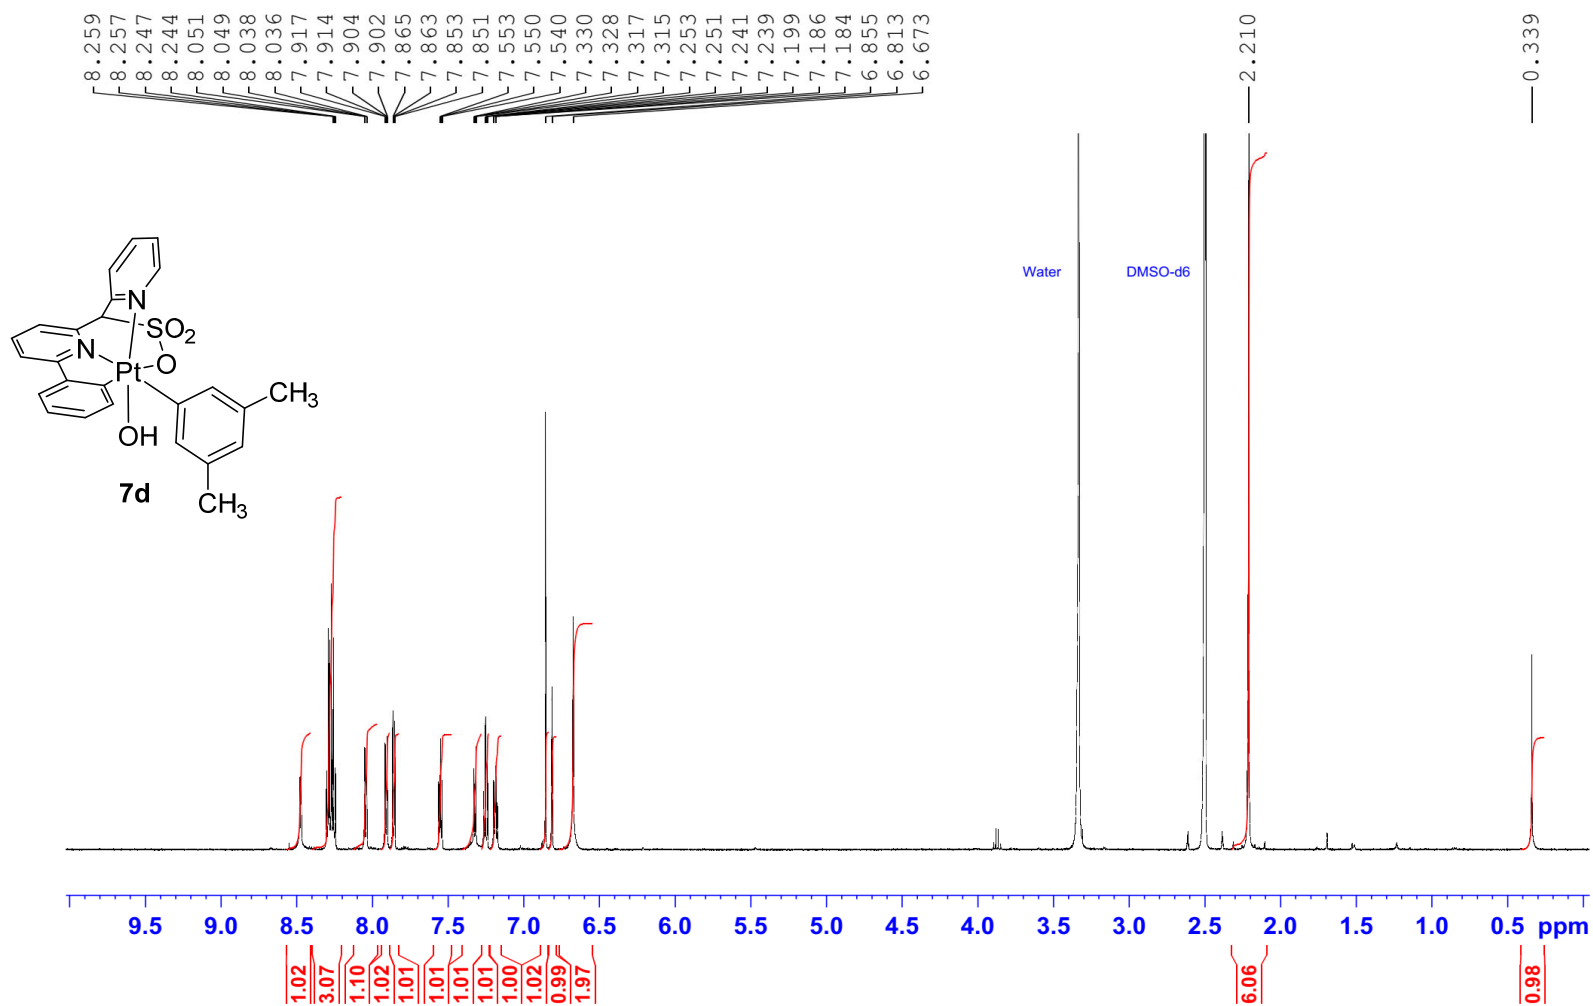

**Figure S49.**  $^1\text{H}$ -NMR of **7d** in  $\text{DMSO-d}_6$ .



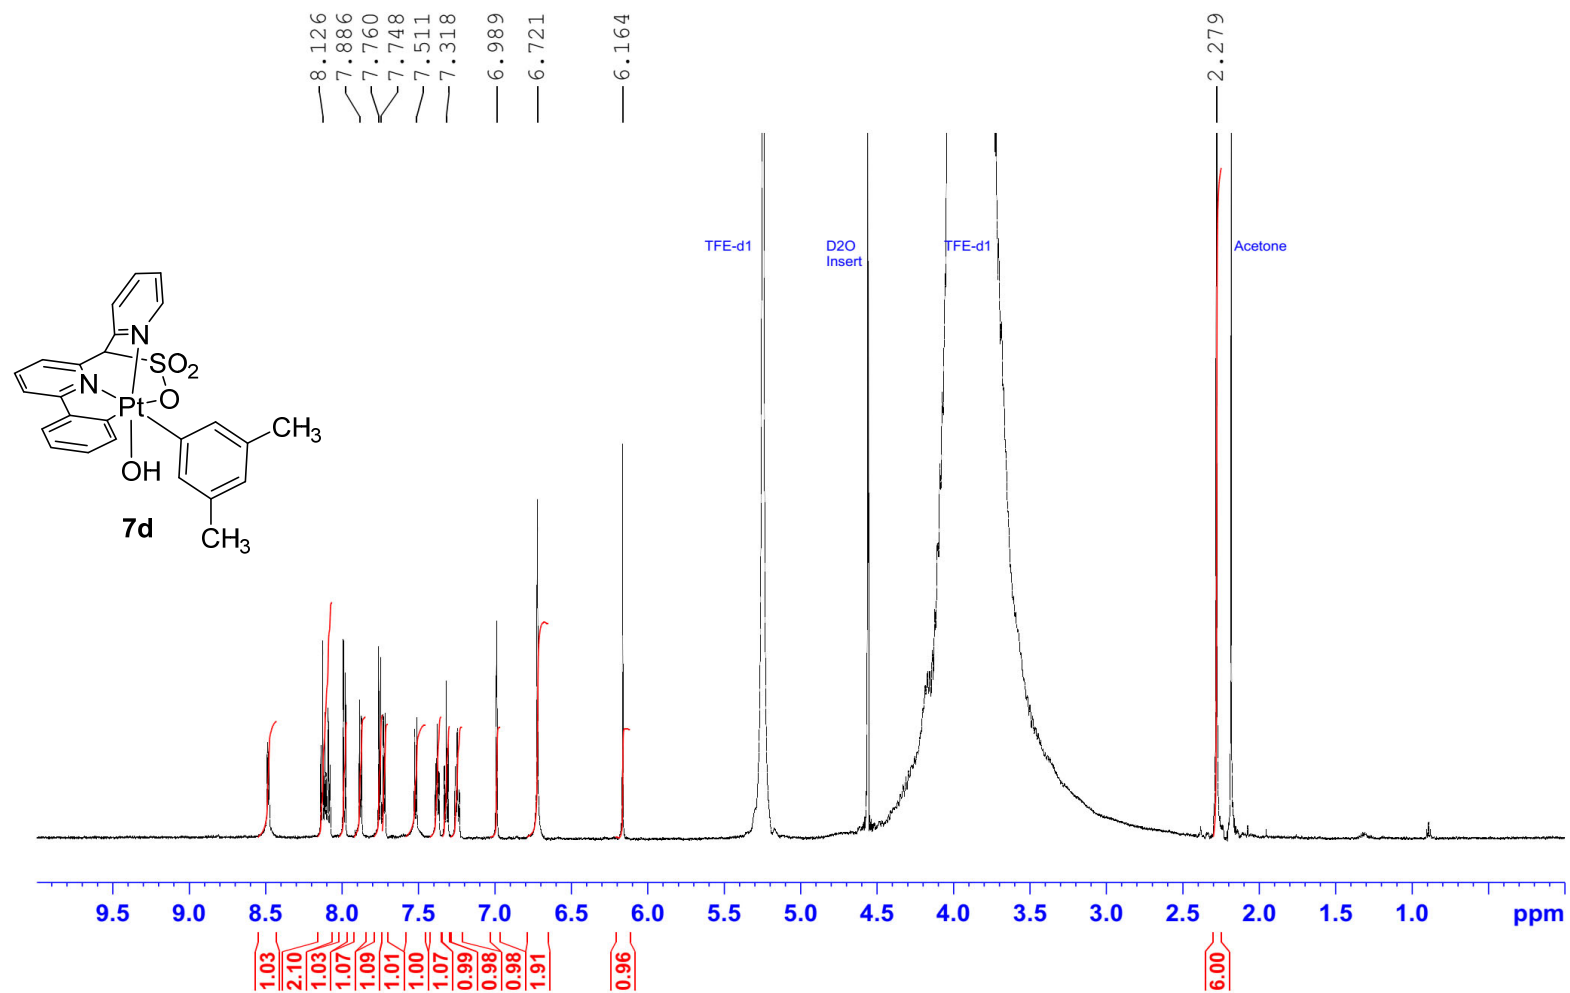

**Figure S50.** <sup>1</sup>H-NMR of **7d** in TFE-d<sub>1</sub>.

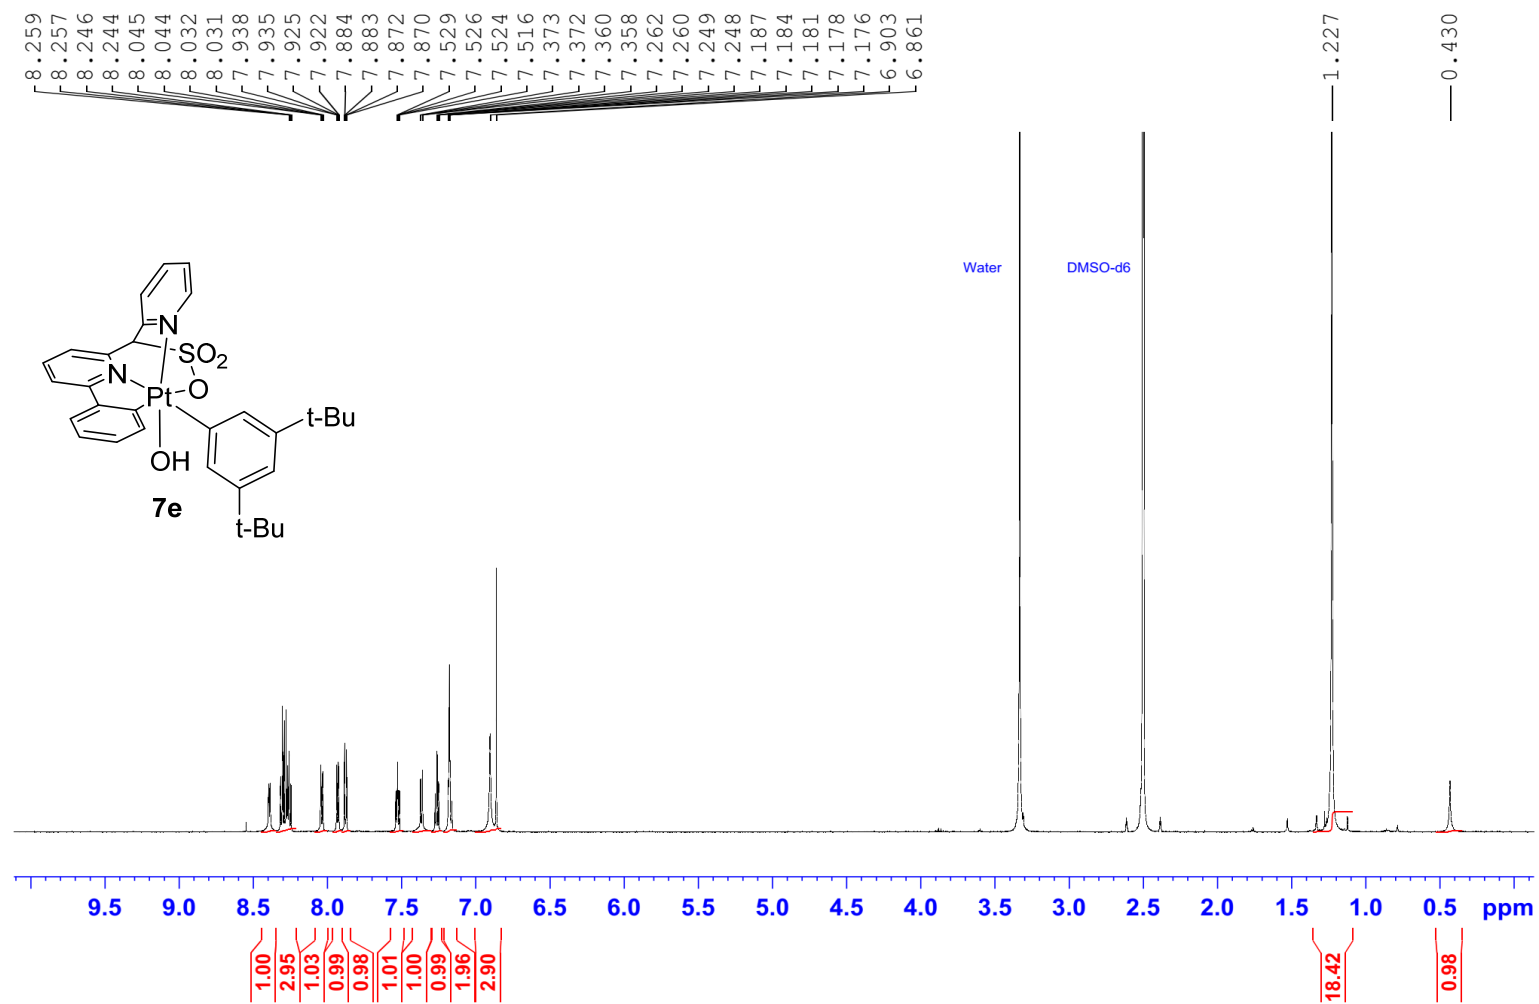

**Figure S51.** <sup>1</sup>H-NMR of **7e** in DMSO-d<sub>6</sub>.

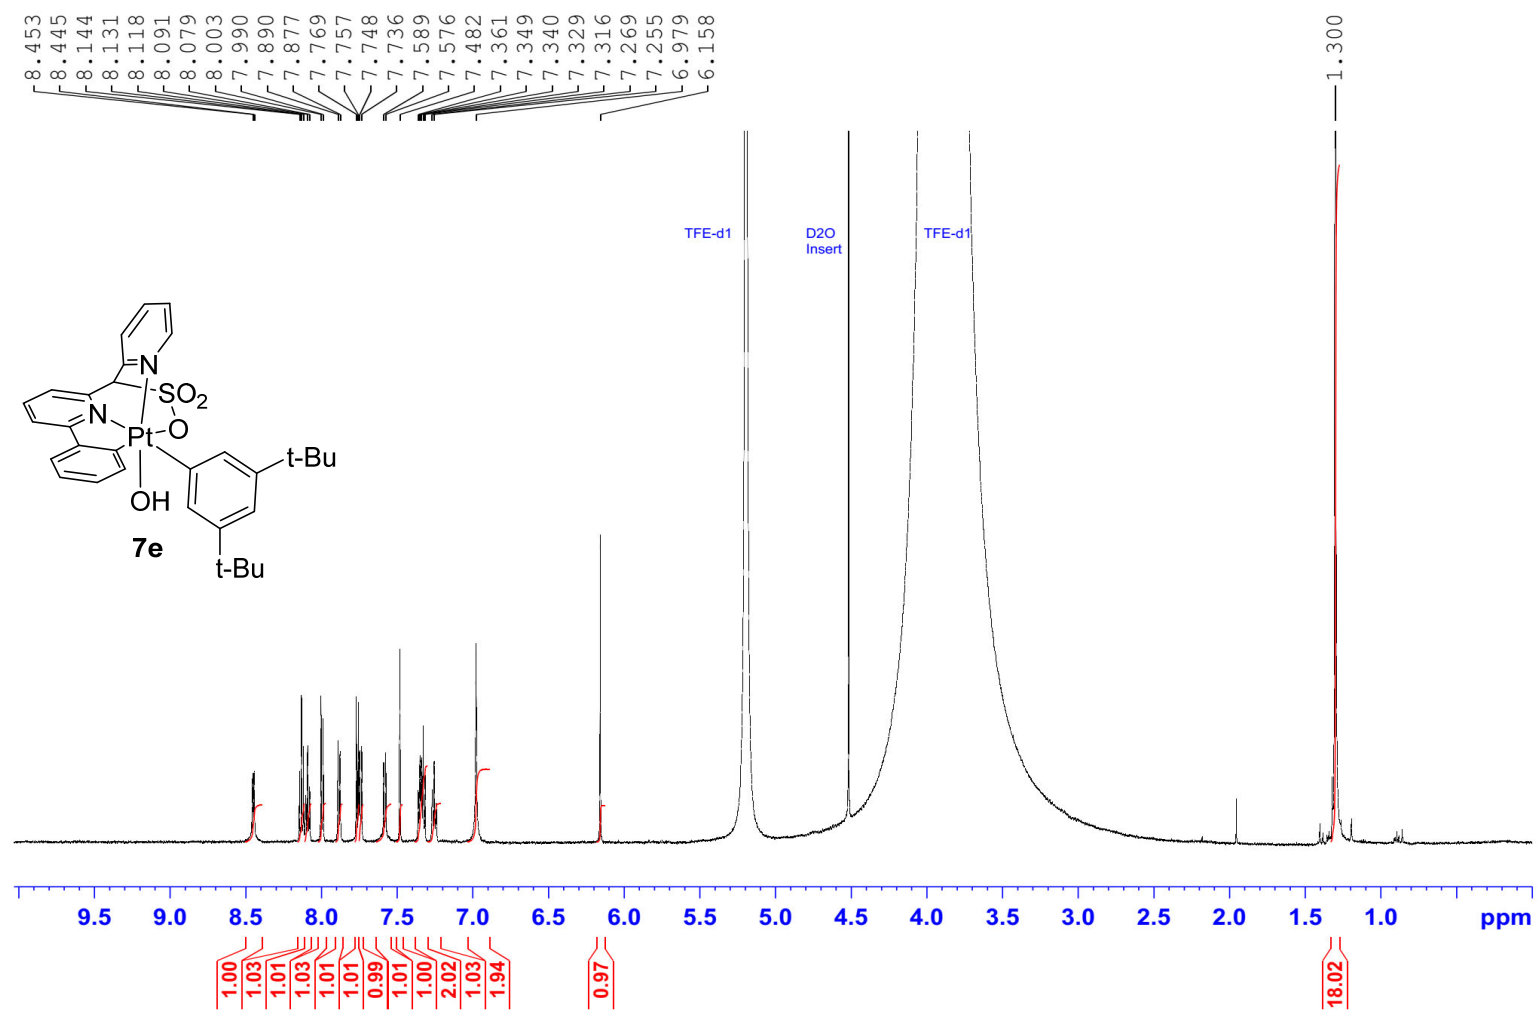

**Figure S52.**  $^1\text{H-NMR}$  spectrum of **7e** in  $\text{TFE-d}_1$ .

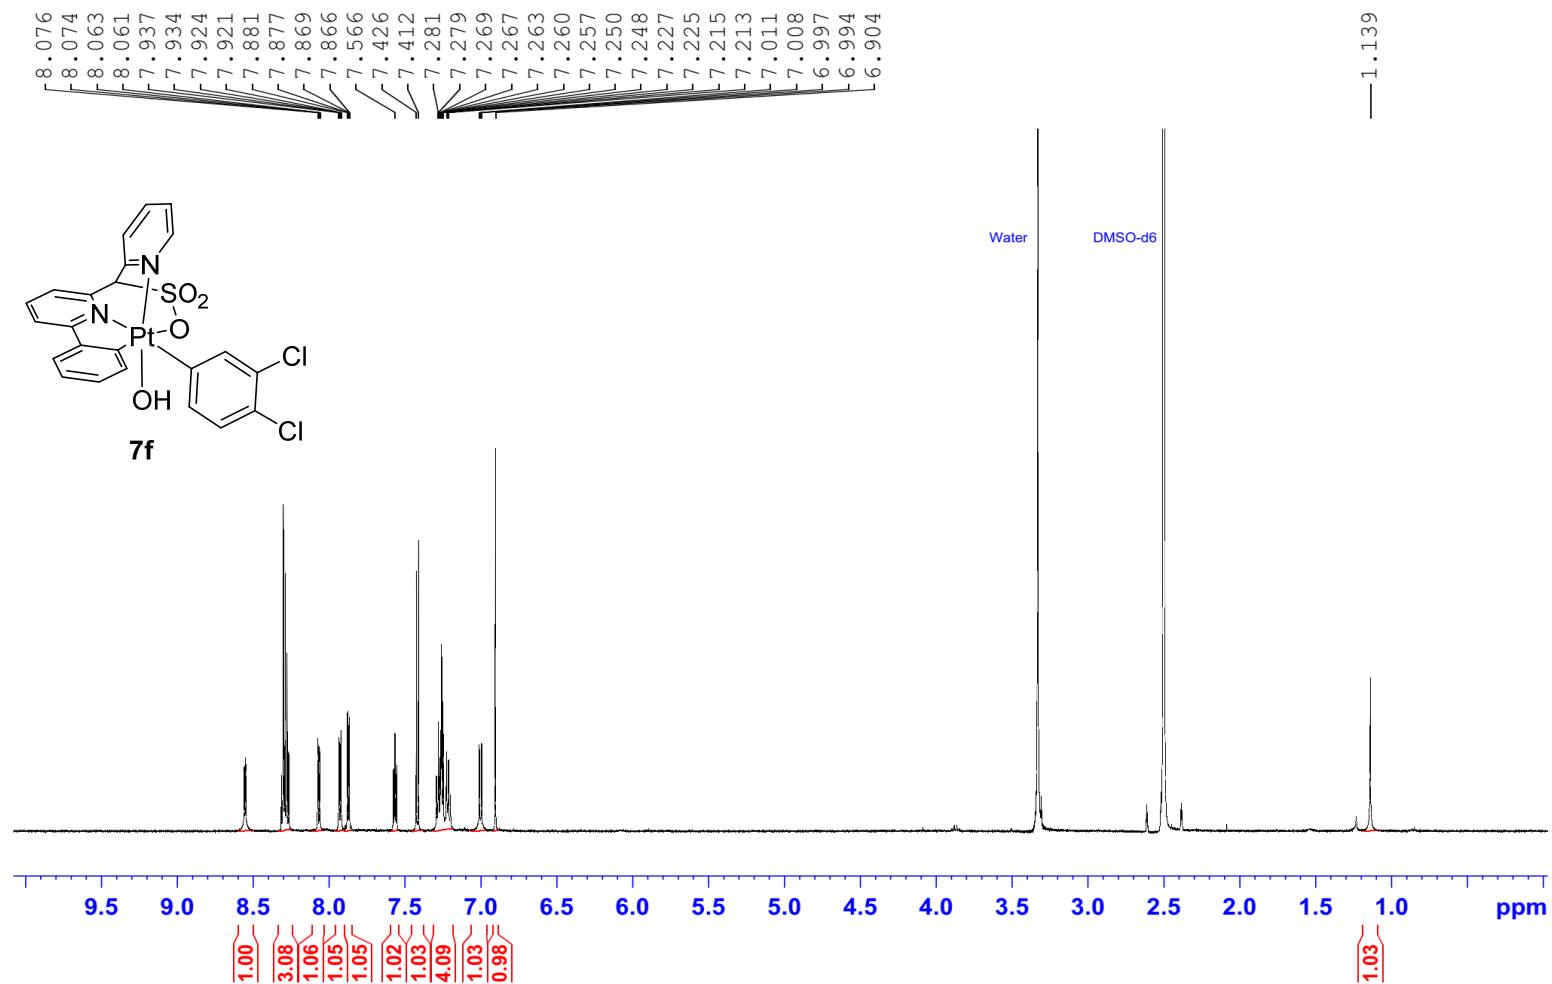

**Figure S53.** <sup>1</sup>H-NMR of **7f** in DMSO-d<sub>6</sub>.

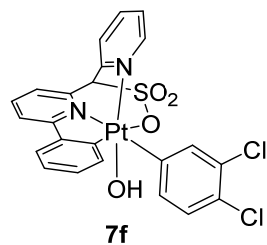

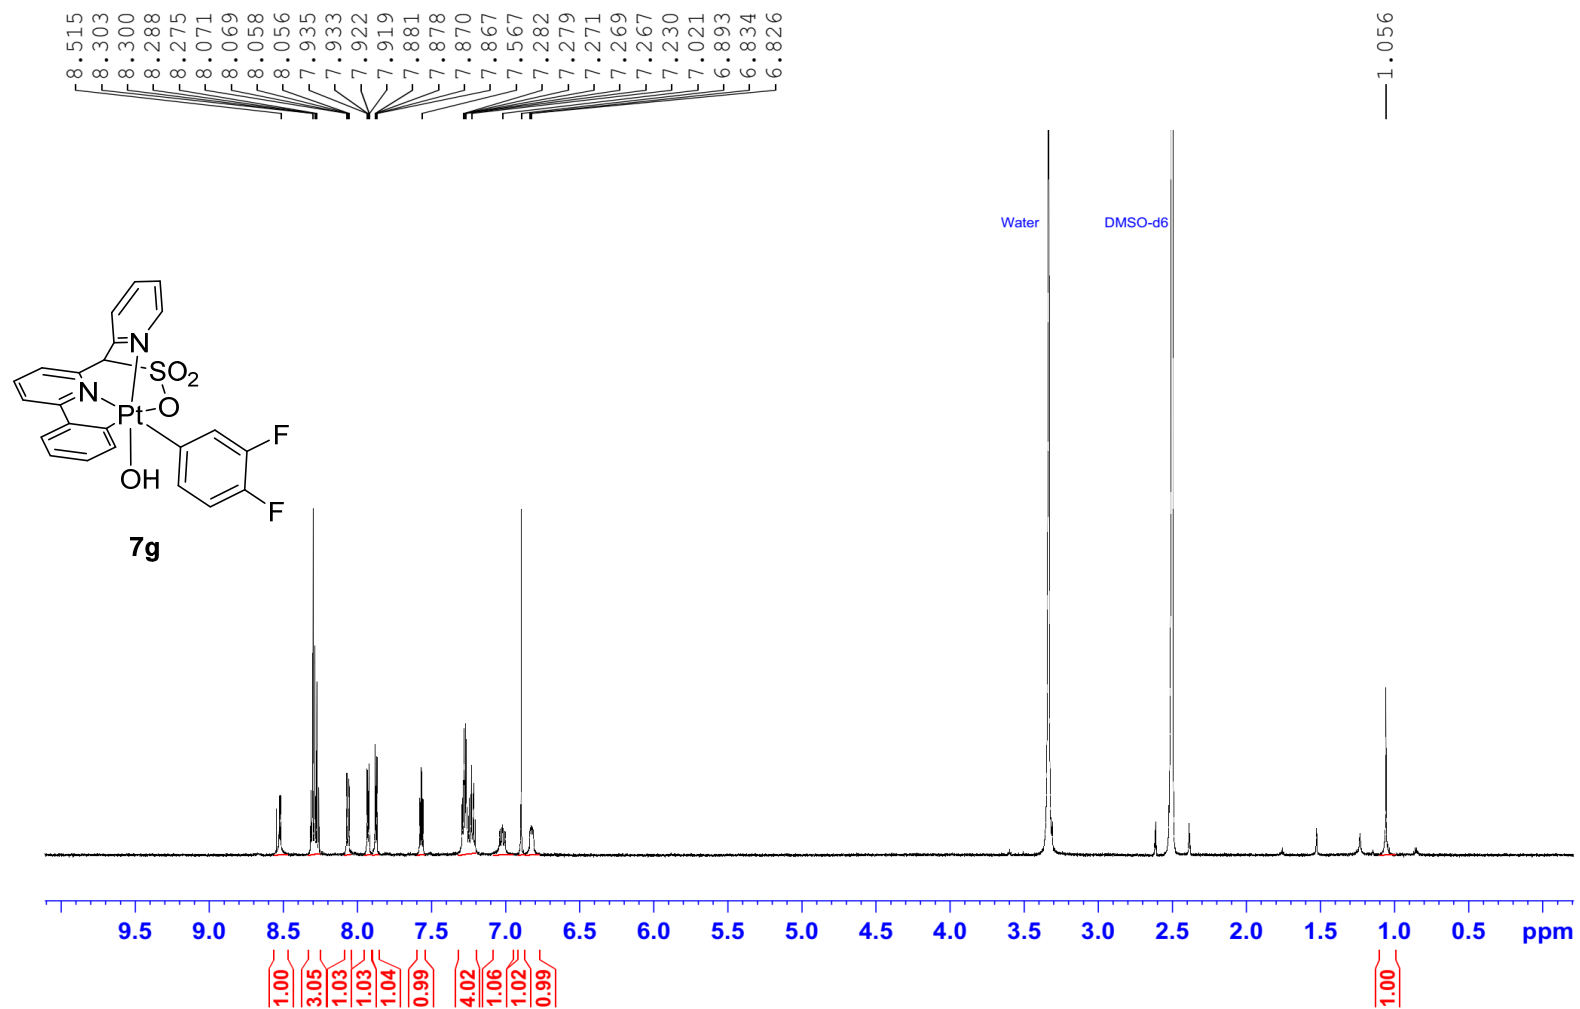

Figure S26. <sup>1</sup>H-NMR of **7g** in DMSO-d<sub>6</sub>.

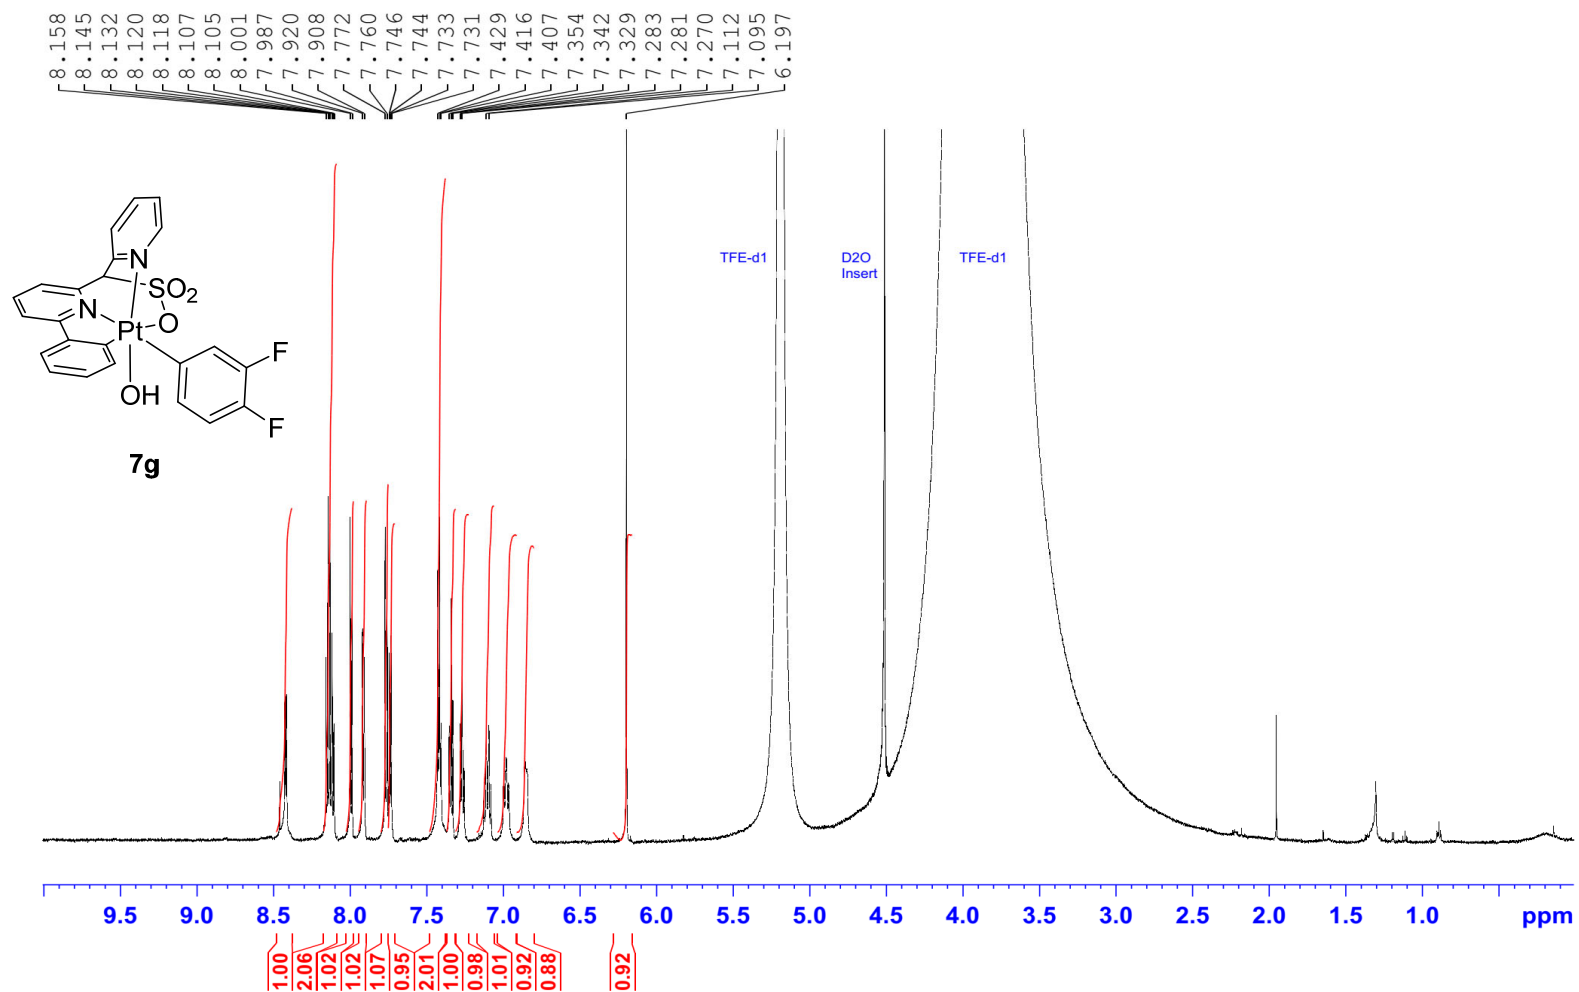

Figure S27. <sup>1</sup>H-NMR of **7g** in TFE-d<sub>1</sub>.

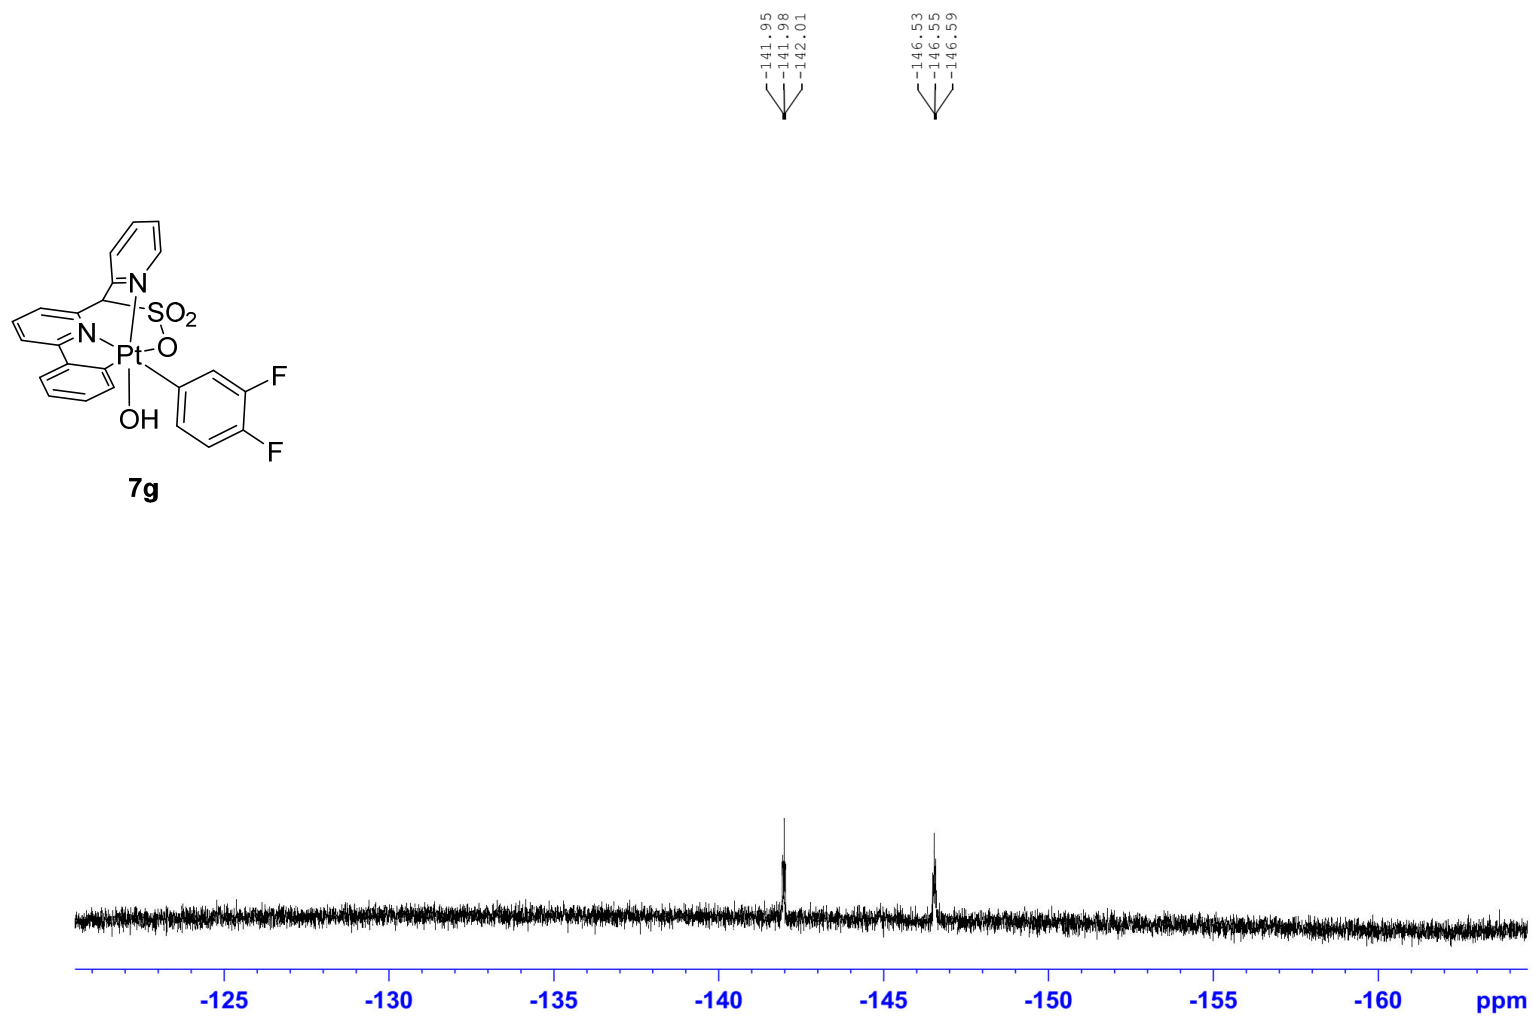

**Figure S28.**  $^{19}\text{F}$ -NMR of **7g** in acetone- $\text{d}_6$ .



## IX. References

1. Watts, D.; Wang, D.; Zavalij, P. Y.; Vedernikov A. N., *Isr. J. Chem.* **2017**, 1010-1022.
2. Watts, D.; Wang, D.; Adelberg, M.; Zavalij, P. Y.; Vedernikov A. N., *Organometallics* **2017**, 207-219.
3. Hadj-Bagheri, N.; Puddephatt, R., *Polyhedron* **1988**, 7, 2695-2702.
